# Supplementary material for: Cyclin F drives proliferation through SCF-dependent degradation of the retinoblastoma-like tumor suppressor p130/RBL2
Source: eLife journal article supplement (doi:10.7554/elife.70691), 2021-12-01

# Enrico\_Fig1\_Source Data 1 For Fig1D

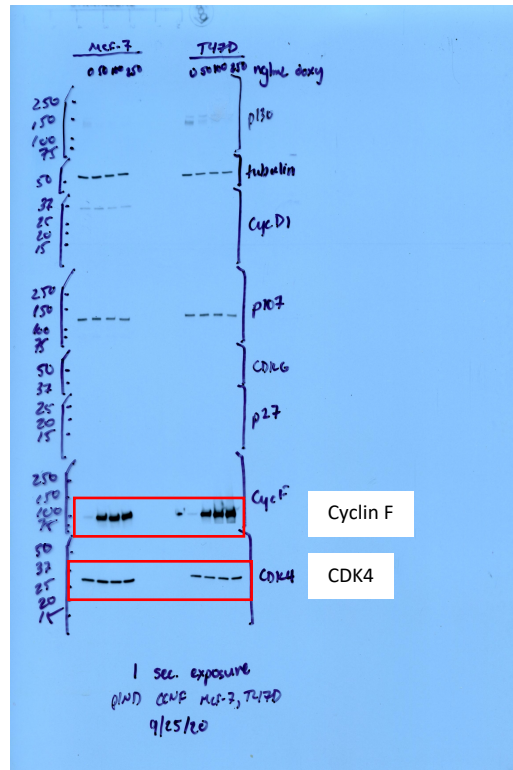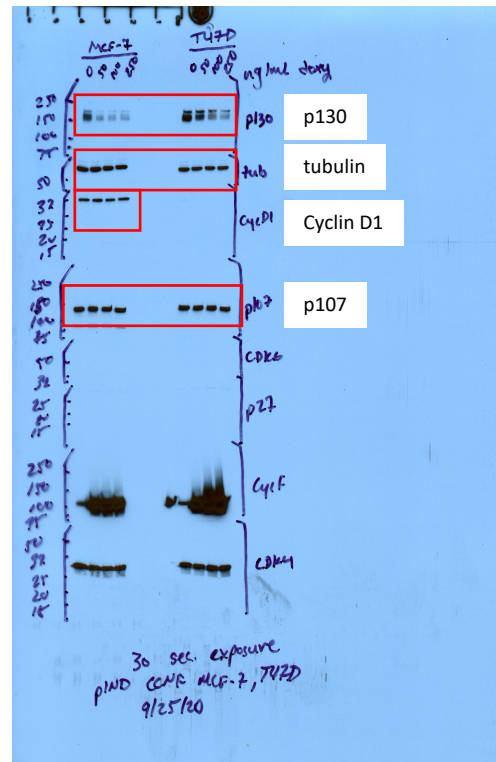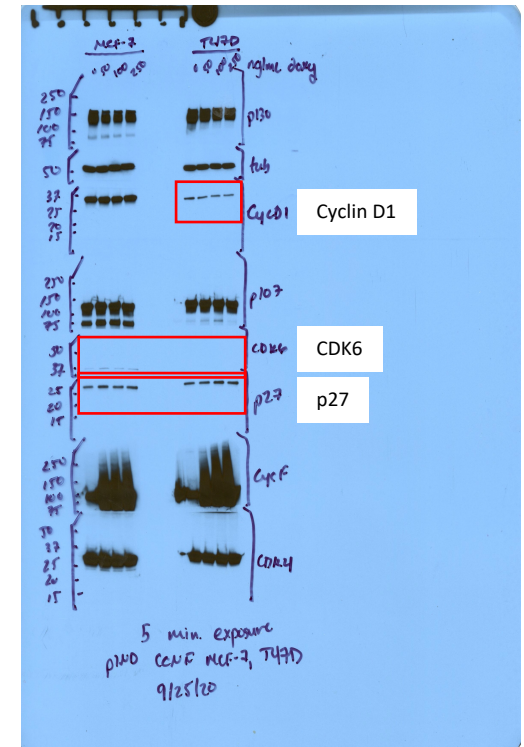

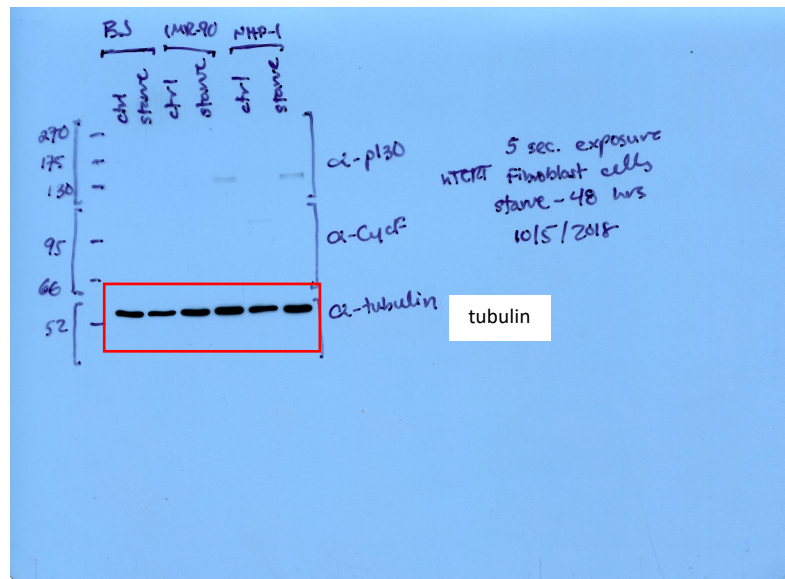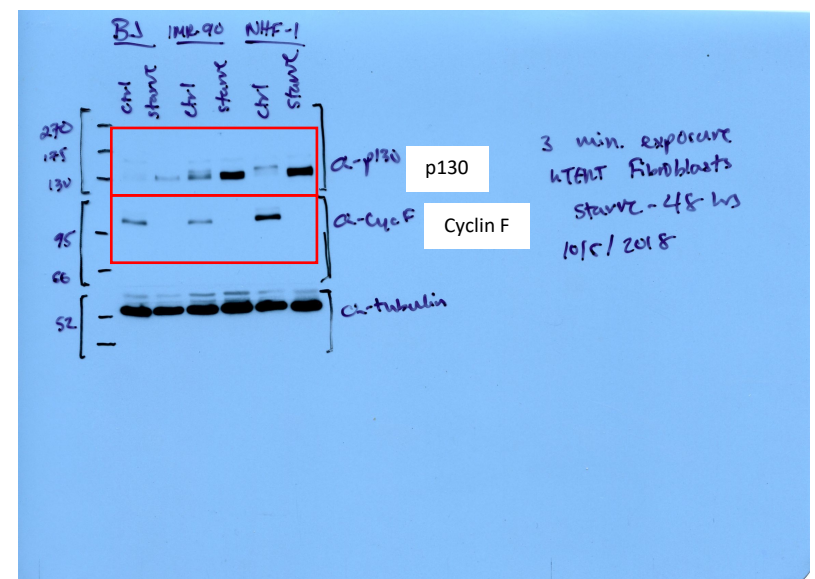



# Enrico\_Fig1\_Source Data 3 For Fig 1F

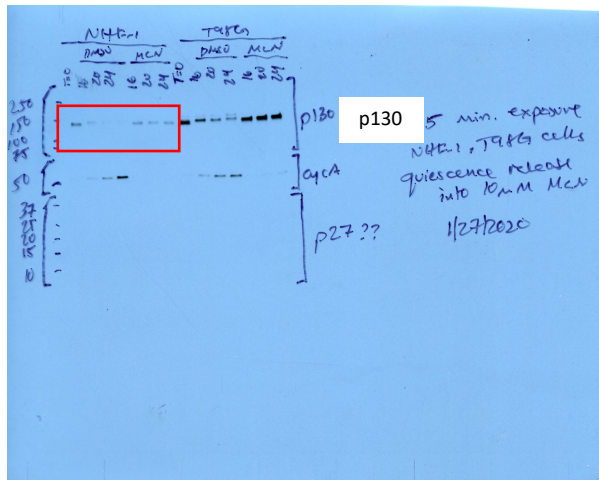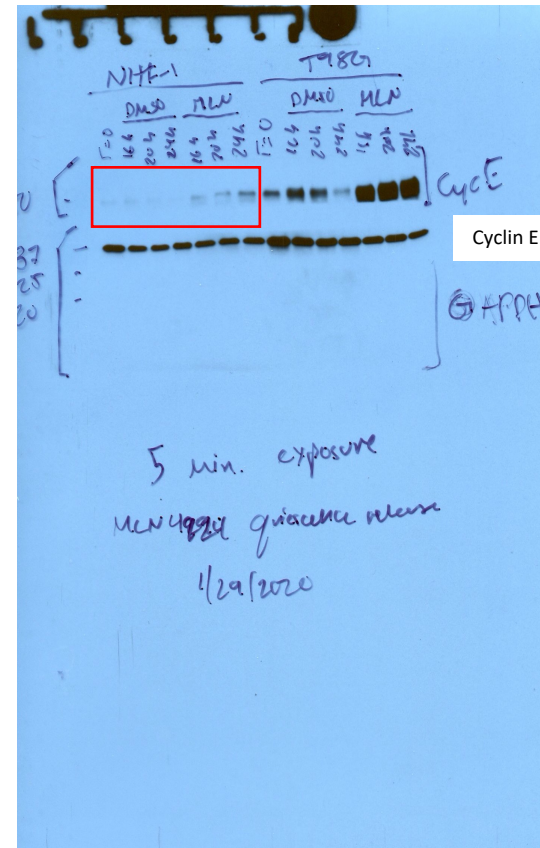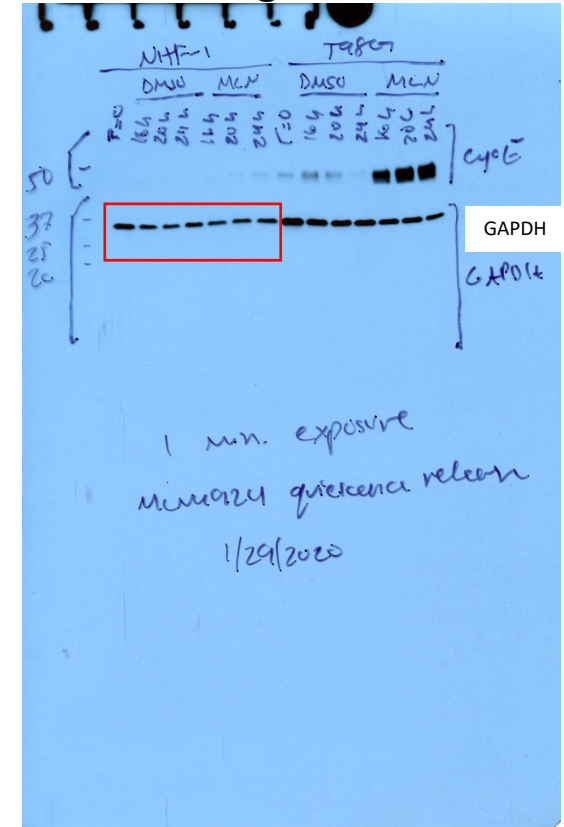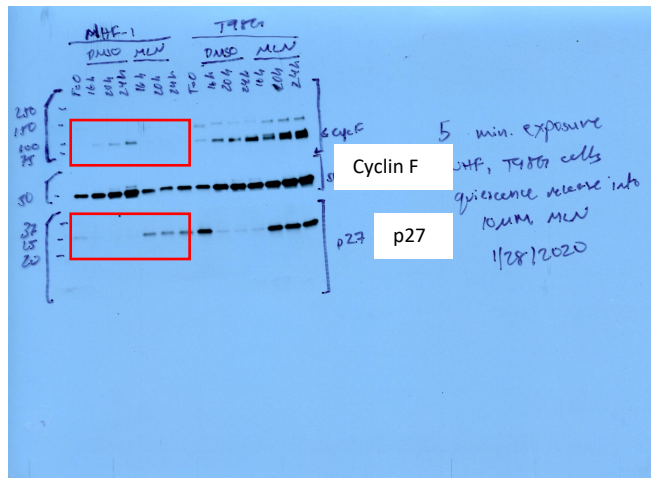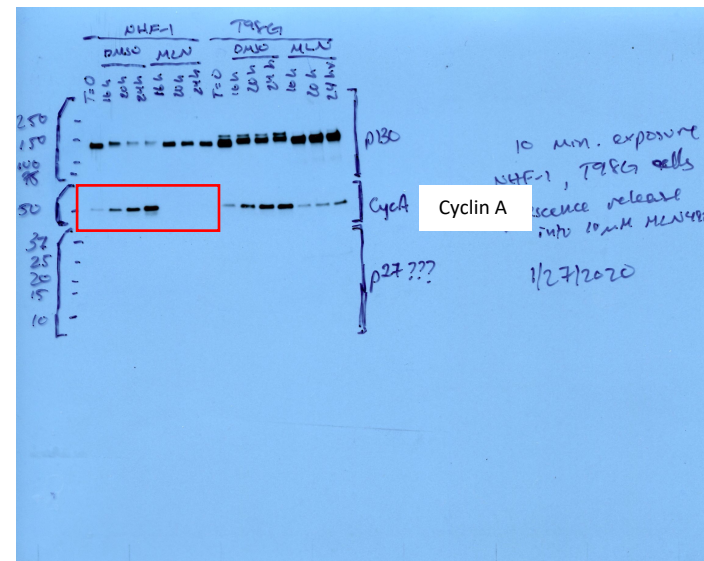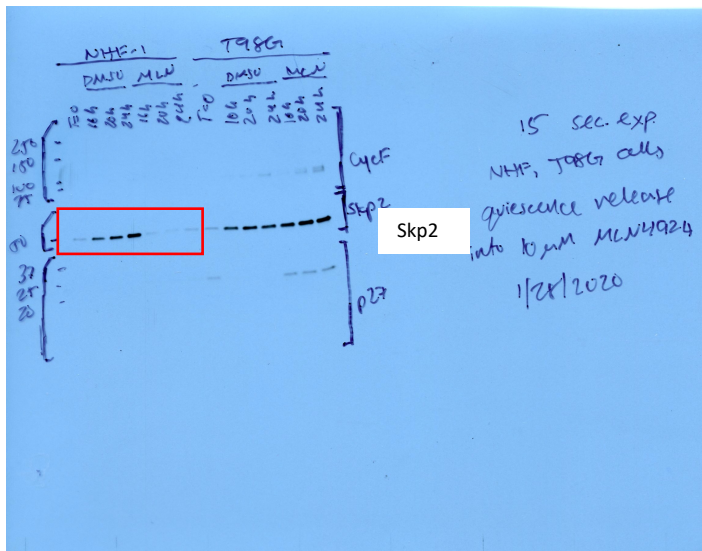

# Enrico\_Fig1\_Source Data 4 For Fig1D

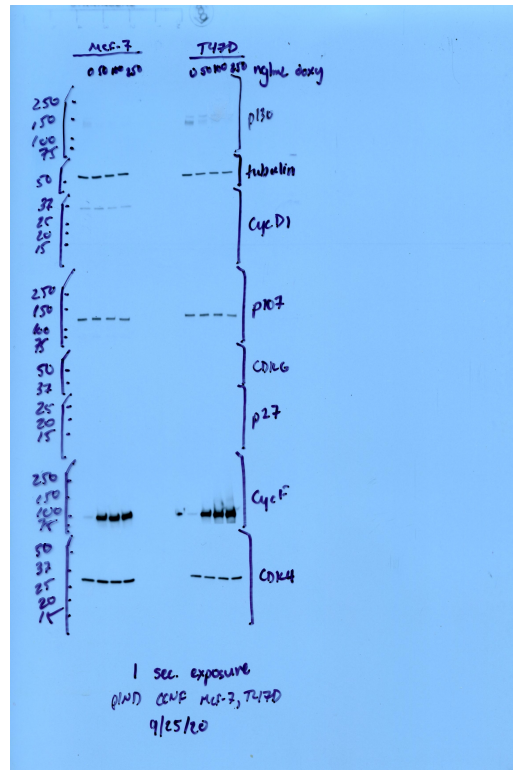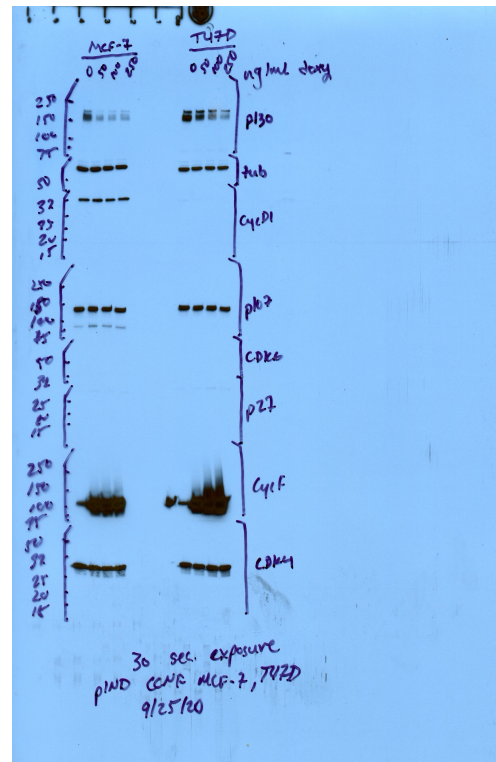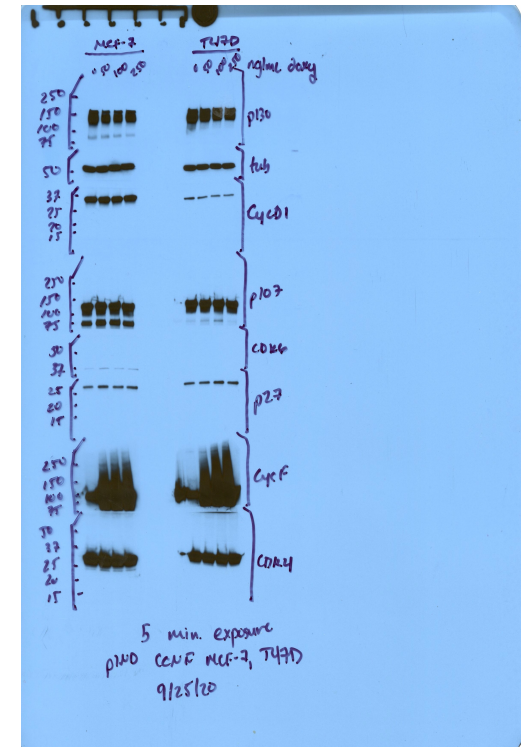



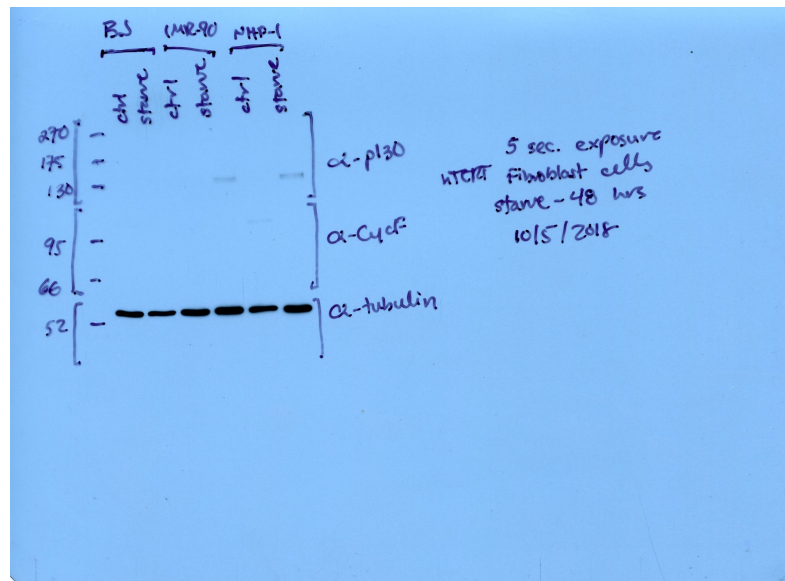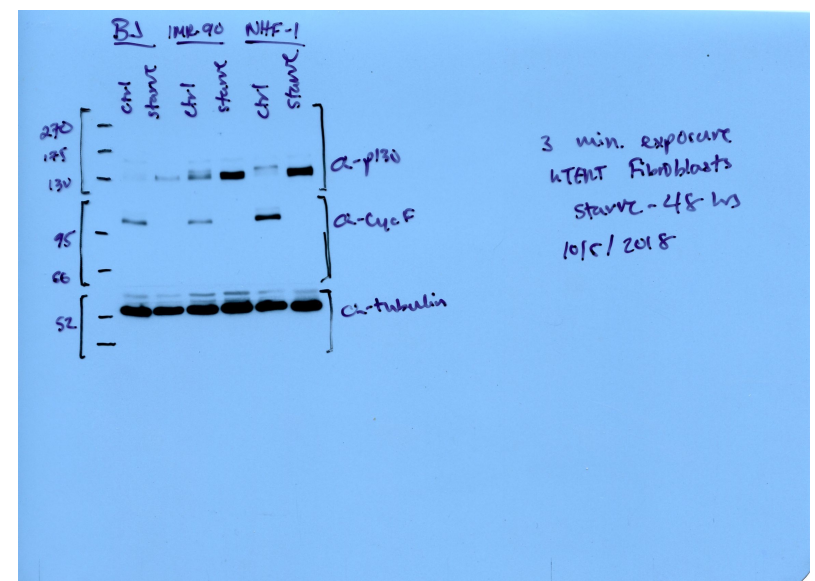

# Enrico\_Fig1\_Source Data 6 For Fig 1F

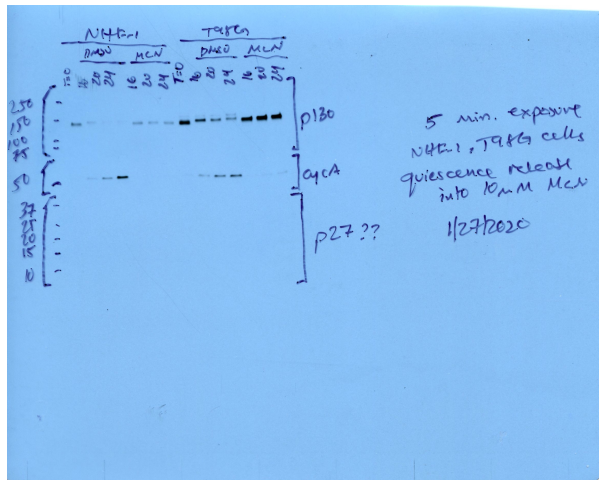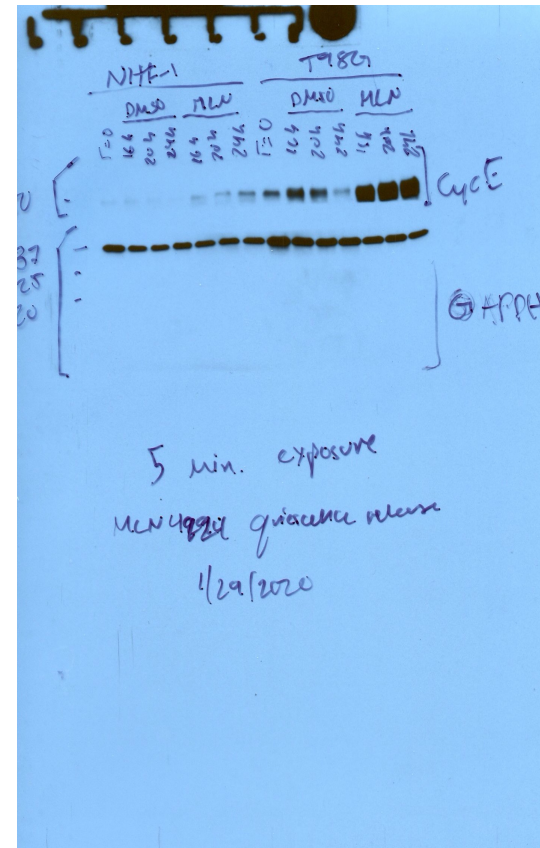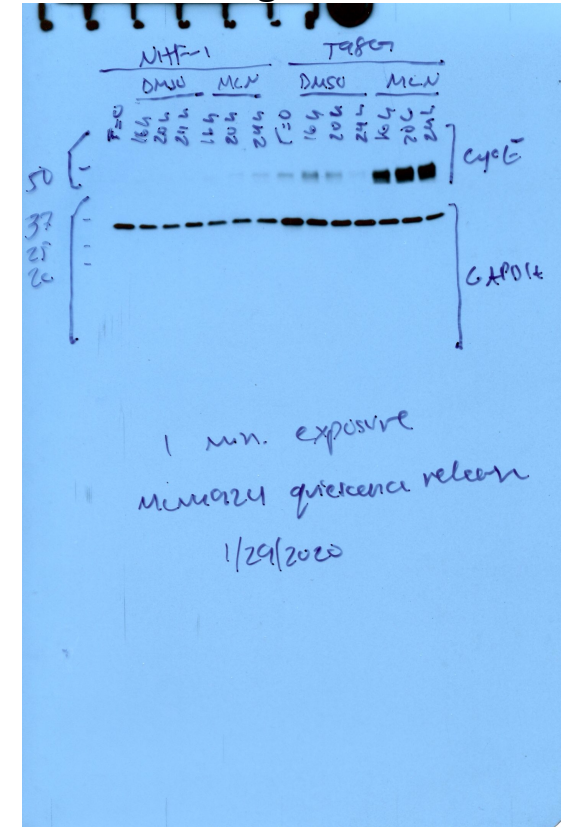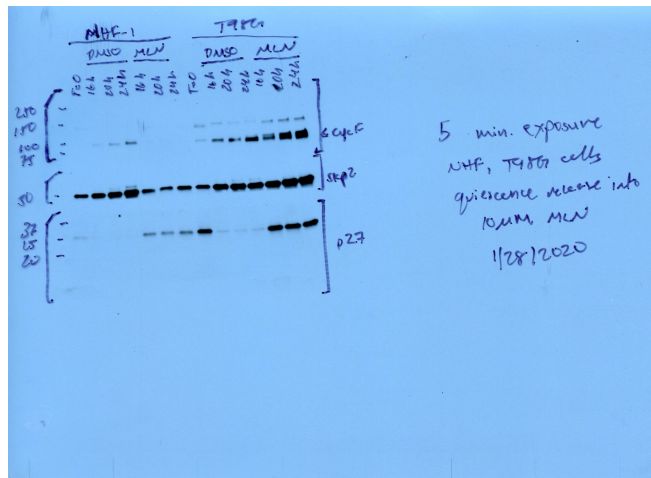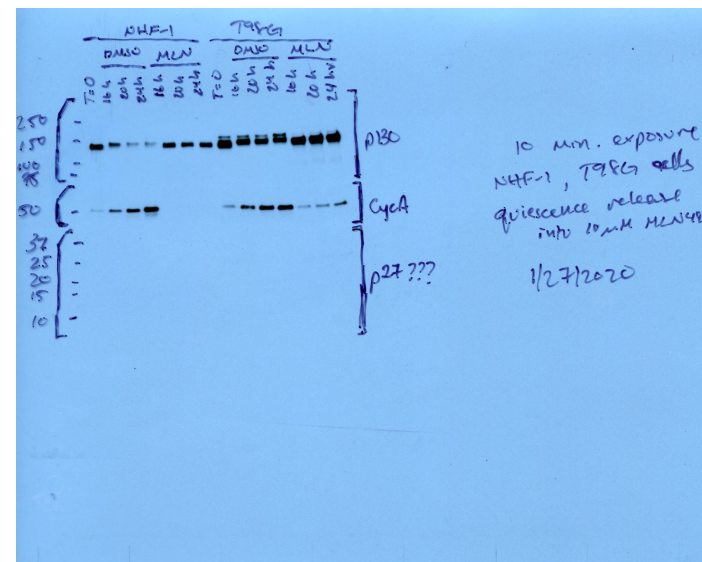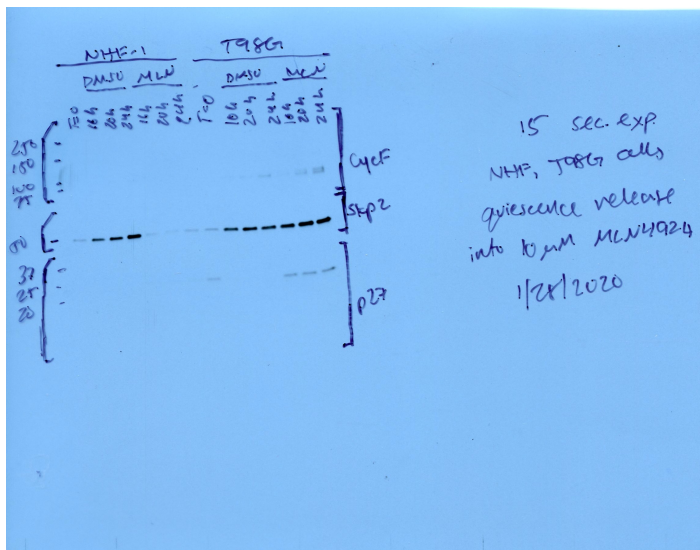

Supplement: supp2 [file elife-70691-supp2-v2.zip]
