# Supplementary material for: Cyclin F drives proliferation through SCF-dependent degradation of the retinoblastoma-like tumor suppressor p130/RBL2
Source: eLife. 2021 Dec 1;10:e70691. doi: 10.7554/eLife.70691 (PMC8670743; doi:10.7554/eLife.70691)
Supplement: Source data 1. — This source data file includes all uncropped blots used to generate data for the main figures and figure supplements. Additionally, copies of the uncropped images are shown a second time where blot strips shown in figures are highlighted with a red square and the protein that was blotted for is noted. [file elife-70691-supp2.zip]

Archive with 30 entries (29 files):
- Source Data 1/
- __MACOSX/._Source Data 1
- Source Data 1/Enrico-Fig7S2-source-data.pdf
- __MACOSX/Source Data 1/._Enrico-Fig7S2-source-data.pdf
- Source Data 1/Enrico-Fig4-source-data.pdf
- __MACOSX/Source Data 1/._Enrico-Fig4-source-data.pdf
- Source Data 1/Enrico-Fig1S3-source-data.pdf
- __MACOSX/Source Data 1/._Enrico-Fig1S3-source-data.pdf
- Source Data 1/.DS_Store
- __MACOSX/Source Data 1/._.DS_Store
- Source Data 1/Enrico-Fig3-source-data.pdf
- __MACOSX/Source Data 1/._Enrico-Fig3-source-data.pdf
- Source Data 1/Enrico-Fig5S2-source-data.pdf
- __MACOSX/Source Data 1/._Enrico-Fig5S2-source-data.pdf
- Source Data 1/Enrico-Fig2-source-data.pdf
- __MACOSX/Source Data 1/._Enrico-Fig2-source-data.pdf
- Source Data 1/Enrico-Fig5-source-data.pdf
- __MACOSX/Source Data 1/._Enrico-Fig5-source-data.pdf
- Source Data 1/Enrico-Fig3S1-source-data.pdf
- __MACOSX/Source Data 1/._Enrico-Fig3S1-source-data.pdf
- Source Data 1/Enrico-Fig2S1-source-data.pdf
- __MACOSX/Source Data 1/._Enrico-Fig2S1-source-data.pdf
- Source Data 1/Enrico-Fig4S1-source-data.pdf
- __MACOSX/Source Data 1/._Enrico-Fig4S1-source-data.pdf
- Source Data 1/Enrico-Fig6-source-data.pdf
- __MACOSX/Source Data 1/._Enrico-Fig6-source-data.pdf
- Source Data 1/Enrico-Fig5S1-source-data.pdf
- __MACOSX/Source Data 1/._Enrico-Fig5S1-source-data.pdf
- Source Data 1/Enrico-Fig1-source-data.pdf
- __MACOSX/Source Data 1/._Enrico-Fig1-source-data.pdf
