# Supplementary material for: Cyclin F drives proliferation through SCF-dependent degradation of the retinoblastoma-like tumor suppressor p130/RBL2
Source: eLife. 2021 Dec 1;10:e70691. doi: 10.7554/eLife.70691 (PMC8670743; doi:10.7554/eLife.70691)
Supplement: Source data 2. — This source data file contains quantified band densities and background used to generate the cycloheximide protein degradation plot and for the protein half-life calculations. [file elife-70691-supp3.xlsx]

## Sheet: WT n=1
			invert pixel density	minus background		band to loading control ratio	norm to zero timepoint
WT p130	0	93.259	161.741	101.906		1.27277	1
	2	97.629	157.371	97.536		1.15397	0.906658
	4	114.46	140.54	80.705		0.980989	0.770748
	8	132.351	122.649	62.814		0.653904	0.513762
	0	146.363	108.637	48.802		0.525086	1
	2	170.651	84.349	24.514		0.263546	0.50191
	4	183.052	71.948	12.113		0.139499	0.265669
	8	187.44	67.56	7.725		0.0951402	0.18119
	background	195.165	59.835
tubulin	0	174.934	80.066	80.066
	2	170.478	84.522	84.522
	4	172.731	82.269	82.269
	8	158.94	96.06	96.06
	0	162.059	92.941	92.941
	2	161.984	93.016	93.016
	4	168.168	86.832	86.832
	8	173.804	81.196	81.196
	backgorund	196.994	58.006

## Sheet: AA n=1
			invert pixel density	minus background		band to loading control ratio	norm to zero timepoint
p130	0	93.42	161.58	161.58		5.22963	1
	2	102.78	152.22	152.22		4.57103	0.874064
	4	120.707	134.293	134.293		6.22188	1.18973
	8	141.32	113.68	113.68		5.50455	1.05257
	0	121.728	133.272	133.272		5.60202	1
	2	128.522	126.478	126.478		3.92825	0.701221
	4	140.942	114.058	114.058		4.89603	0.873977
	8	159.212	95.788	95.788		4.75445	0.848704
	background	195.165	59.835
tubulin	0	166.097	88.903	30.897
	2	163.693	91.307	33.301
	4	175.41	79.59	21.584
	8	176.342	78.658	20.652
	0	173.204	81.796	23.79
	2	164.797	90.203	32.197
	4	173.698	81.302	23.296
	8	176.847	78.153	20.147
	background	196.994	58.006

## Sheet: WT n=2
p130			invert pixel density	minus background		band to loading control ratio	norm to zero timepoint
	0	94.612	160.388	92.627		1.96086	1
	2	91.922	163.078	95.317		1.72448	0.87945
	4	101.891	153.109	85.348		1.49878	0.764349
	8	120.183	134.817	67.056		1.21663	0.62046
	0	156.556	98.444	30.683		0.593642	1
	2	180.158	74.842	7.081		0.142555	0.240136
	4	183.963	71.037	3.276		0.055957	0.0942604
	8	186.416	68.584	0.823		0.0136279	0.0229563
	background	187.239	67.761
tubulin
	0	141.17	113.83	47.238
	2	133.135	121.865	55.273
	4	131.463	123.537	56.945
	8	133.292	121.708	55.116
	0	136.722	118.278	51.686
	2	138.736	116.264	49.672
	4	129.863	125.137	58.545
	8	128.017	126.983	60.391
	background	188.408	66.592

## Sheet: AA n=2
p130			invert pixel density	minus background		band to loading control ratio	norm to zero timepoint
	0	114.769	140.231	75.583		4.65413	1
	2	117.313	137.687	73.039		3.23912	0.695968
	4	128.893	126.107	61.459		2.87581	0.617906
	8	154.827	100.173	35.525		1.30047	0.279424
	0	134.145	120.855	56.207		2.43605	1
	2	138.447	116.553	51.905		2.24105	0.919953
	4	153.313	101.687	37.039		1.44882	0.59474
	8	170.102	84.898	20.25		0.717068	0.294357
	background	190.352	64.648
tubulin
	0	174.112	80.888	16.24
	2	167.803	87.197	22.549
	4	168.981	86.019	21.371
	8	163.035	91.965	27.317
	0	167.279	87.721	23.073
	2	167.191	87.809	23.161
	4	164.787	90.213	25.565
	8	162.112	92.888	28.24
	background	190.352	64.648

## Sheet: WT n=3
p130			invert pixel density	minus background		band to loading control ratio	norm to zero timepoint
	0	116.971	138.029	78.585		6.64679	1
	2	120.698	134.302	74.858		7.4382	1.11907
	4	129.013	125.987	66.543		4.27709	0.643482
	8	141.231	113.769	54.325		4.30127	0.647119
	0	153.625	101.375	41.931		2.63138	1
	2	180.635	74.365	14.921		0.676045	0.256917
	4	189.921	65.079	5.635		0.211199	0.0802618
	8	190.424	64.576	5.132		0.210431	0.07997
	background	195.556	59.444
tubulin
	0	184.526	70.474	11.823
	2	186.285	68.715	10.064
	4	180.791	74.209	15.558
	8	183.719	71.281	12.63
	0	180.414	74.586	15.935
	2	174.278	80.722	22.071
	4	169.668	85.332	26.681
	8	171.961	83.039	24.388
	background	196.349	58.651

## Sheet: AA n=3
p130			invert pixel density	minus background		band to loading control ratio	norm to zero timepoint
	0	135.467	119.533	59.034		4.81242	1
	2	140.717	114.283	53.784		4.38445	0.911068
	4	153.534	101.466	40.967		4.31731	0.897119
	8	164.74	90.26	29.761		3.33382	0.692753
	0	152.092	102.908	42.409		7.44279	1
	2	155.624	99.376	38.877		3.22256	0.432978
	4	163.19	91.81	31.311		4.89158	0.657224
	8	177.44	77.56	17.061		2.66536	0.358114
	background	194.501	60.499
tubulin
	0	184.582	70.418	12.267
	2	184.582	70.418	12.267
	4	187.36	67.64	9.489
	8	187.922	67.078	8.927
	0	191.151	63.849	5.698
	2	184.785	70.215	12.064
	4	190.448	64.552	6.401
	8	190.448	64.552	6.401
	background	196.849	58.151
