# Supplementary material for: Cyclin F drives proliferation through SCF-dependent degradation of the retinoblastoma-like tumor suppressor p130/RBL2
Source: eLife journal article supplement (doi:10.7554/elife.70691), 2021-12-01
Supplement: supp4 [file Apoptosis-necrosis.xlsx]

## Sheet: Sheet1
	Live %			Apoptotic/necrotic %
WT STN	38.7	43.3	44.4	59.1	54.5	53.4
WT d0	85.6	85.7	86.4	12	12	11.4
WT d2	85.2	85.4	85.9	12.4	12.1	11.7
WT d8	86.3	86.7	87.2	11.4	11	10.5
WT d14	84.2	84.6	84.8	13.3	12.9	12.7
AA STN	43.8	53.9	53.5	54.2	44.1	44.5
AA d0	86.6	86.8	87.7	11	10.9	10
AA d2	86.1	86.2	86.7	11.6	11.5	11
AA d8	69.3	69.4	69	27.9	27.7	28.1
AA d14	85.8	85.9	86.5	11.6	11.5	11
