# Supplementary material for: Cyclin F drives proliferation through SCF-dependent degradation of the retinoblastoma-like tumor suppressor p130/RBL2
Source: eLife journal article supplement (doi:10.7554/elife.70691), 2021-12-01
Supplement: supp4 [file cyclin F depletion flow.xlsx]

## Sheet: Sheet1
HeLa	sgCTRL			sgCCNF
	1	2	3	1	2	3
G1%	18.3	14.8	10.5	32.7	18.5	10.9
S%	15.4	18.2	15.4	13.5	14.4	14.9
G2-M%	64.4	64.4	64.4	51.2	61.6	69.9
NHF	sgCTRL			sgCCNF
	1	2	3	1	2	3
G1%	66.3	70.3	71.5	71.9	71.4	72.1
S%	8.06	8.7	8.15	8.64	8.61	8.86
G2-M%	17.1	14.7	15.2	14.8	15.1	14.9
IMR90	sgCTRL			sgCCNF
	1	2	3	1	2	3
G1%	31.8	32.2	32.7	32.3	30.5	31
S%	38.6	37.8	37.3	37.1	37.1	40.4
G2-M%	24.5	24.3	24.4	24.8	25.9	23
