# Supplementary material for: Cyclin F drives proliferation through SCF-dependent degradation of the retinoblastoma-like tumor suppressor p130/RBL2
Source: eLife journal article supplement (doi:10.7554/elife.70691), 2021-12-01
Supplement: supp4 [file p130 WT v AA cell cycle flow.xlsx]

## Sheet: Sheet1
G1%
WT Ctrl	28	49.4	36.3	42.2	31.8
AA Ctrl	53.5	33.9	38.5	41.1	37.3
WT d3	52.6	50.4	49.3
AA d3	47.8	55.3	58.7
WT d5	47.5	42.3	48.9
AA d5	62.5	61.7	60.4
WT d7	42.7	34.9	29.1
AA d7	50.9	53.9	56.2
WT d10	48.7	49.9	43.2
AA d10	45.9	45.8	45.7
WT d14	47.4	48.7	50.6
AA d14	52.7	51.4	48.6
S%
WT Ctrl	35	13.2	19.6	14	16.7
AA Ctrl	15.7	16.5	20.5	16.2	20.8
WT d3	21.4	23.7	22.8
AA d3	19.4	17	17.3
WT d5	21.5	22.9	20.6
AA d5	13.8	16.9	14.8
WT d7	15.4	32.1	36.6
AA d7	15.4	13.6	15.2
WT d10	18.1	18	16.6
AA d10	15.4	16.1	15.8
WT d14	18.7	18.7	21.2
AA d14	19.4	17.8	18.6
G2/M%
WT Ctrl	1.37	2.22	16.2	0.35	17.2
AA Ctrl	2.52	12.3	11.2	0.51	8.32
WT d3	0.27	0.15	0.47
AA d3	0.33	0.37	0.3
WT d5	0.64	0.88	0.65
AA d5	5.43	5.89	4
WT d7	0.65	4.15	1.42
AA d7	0.4	0.42	0.45
WT d10	2.45	2.02	3.21
AA d10	0.83	1.01	0.89
WT d14	5.25	6.08	3.52
AA d14	4.19	5.64	6.62
