# Supplementary material for: Cyclin F drives proliferation through SCF-dependent degradation of the retinoblastoma-like tumor suppressor p130/RBL2
Source: eLife journal article supplement (doi:10.7554/elife.70691), 2021-12-01
Supplement: supp6 [file rt-qPCR Cdt1.xlsx]

## Sheet: Sheet1
Sample Name	Target Name	CT
WT ctrl n1	GAPDH	18.8479
WT ctrl n1	GAPDH	19.3636
WT ctrl n1	GAPDH	18.9598
WT ctrl n2	GAPDH	17.6347
WT ctrl n2	GAPDH	21.9104
WT ctrl n2	GAPDH	20.7647
WT ctrl n3	GAPDH	20.073
WT ctrl n3	GAPDH	20.6892
WT ctrl n3	GAPDH	19.7874
AA ctrl n1	GAPDH	19.518
AA ctrl n1	GAPDH	25.3171
AA ctrl n1	GAPDH	16.5823
AA ctrl n2	GAPDH	17.5654
AA ctrl n2	GAPDH	22.0858
AA ctrl n2	GAPDH	21.3012
AA ctrl n3	GAPDH	23.5989
AA ctrl n3	GAPDH	23.9718
AA ctrl n3	GAPDH	21.7303
WT doxy n1	GAPDH	20.1397
WT doxy n1	GAPDH	23.0227
WT doxy n1	GAPDH	25.9485
WT doxy n2	GAPDH	22.5462
WT doxy n2	GAPDH	24.212
WT doxy n2	GAPDH	22.882
WT doxy n3	GAPDH	18.9774
WT doxy n3	GAPDH	21.5217
WT doxy n3	GAPDH	28.9708
AA doxy n1	GAPDH	19.2536
AA doxy n1	GAPDH	21.3656
AA doxy n1	GAPDH	26.7206
AA doxy n2	GAPDH	20.9973
AA doxy n2	GAPDH	28.9514
AA doxy n2	GAPDH	21.8036
AA doxy n3	GAPDH	21.1228
AA doxy n3	GAPDH	24.212
AA doxy n3	GAPDH	18.8049
WT ctrl n1	Cdt1	26.555
WT ctrl n1	Cdt1	27.7566
WT ctrl n1	Cdt1	27.6151
WT ctrl n2	Cdt1	28.2818
WT ctrl n2	Cdt1	28.3306
WT ctrl n2	Cdt1	28.1542
WT ctrl n3	Cdt1	27.9872
WT ctrl n3	Cdt1	28.1847
WT ctrl n3	Cdt1	28.0606
AA ctrl n1	Cdt1	28.7159
AA ctrl n1	Cdt1	28.5532
AA ctrl n1	Cdt1	28.2736
AA ctrl n2	Cdt1	28.9961
AA ctrl n2	Cdt1	28.1813
AA ctrl n2	Cdt1	29.2931
AA ctrl n3	Cdt1	29.1517
AA ctrl n3	Cdt1	28.7216
AA ctrl n3	Cdt1	28.9597
WT doxy n1	Cdt1	31.2158
WT doxy n1	Cdt1	31.5577
WT doxy n1	Cdt1	32.0024
WT doxy n2	Cdt1	31.6517
WT doxy n2	Cdt1	32.5928
WT doxy n2	Cdt1	31.9736
WT doxy n3	Cdt1	31.77
WT doxy n3	Cdt1	31.937
WT doxy n3	Cdt1	31.5145
AA doxy n1	Cdt1	32.4642
AA doxy n1	Cdt1	34.1652
AA doxy n1	Cdt1	31.5799
AA doxy n2	Cdt1	34.8189
AA doxy n2	Cdt1	35.92
AA doxy n2	Cdt1	36.8912
AA doxy n3	Cdt1	33.5195
AA doxy n3	Cdt1	35.0985
AA doxy n3	Cdt1	33.5614
