# Supplementary material for: Cyclin F drives proliferation through SCF-dependent degradation of the retinoblastoma-like tumor suppressor p130/RBL2
Source: eLife journal article supplement (doi:10.7554/elife.70691), 2021-12-01
Supplement: supp6 [file rt-qPCR DREAM target genes.xlsx]

## Sheet: Sheet1
Sample Name	Target Name	CT
WT Ctrl n1	GAPDH	26.3801
WT Ctrl n1	GAPDH	26.4036
WT Ctrl n1	GAPDH	26.4849
wt ctrl n2	GAPDH	26.3113
wt ctrl n2	GAPDH	26.2946
wt ctrl n2	GAPDH	26.3787
wt ctrl n3	GAPDH	26.8284
wt ctrl n3	GAPDH	26.5265
wt ctrl n3	GAPDH	26.2703
AA ctrl n1	GAPDH	26.834
AA ctrl n1	GAPDH	27.0768
AA ctrl n1	GAPDH	26.6407
AA ctrl n2	GAPDH	26.2355
AA ctrl n2	GAPDH	26.485
AA ctrl n2	GAPDH	26.3471
AA ctrl n3	GAPDH	26.5289
AA ctrl n3	GAPDH	26.7623
AA ctrl n3	GAPDH	26.699
WT doxy n1	GAPDH	26.3559
WT doxy n1	GAPDH	26.5909
WT doxy n1	GAPDH	26.8487
wt doxy n2	GAPDH	26.2041
wt doxy n2	GAPDH	26.2868
wt doxy n2	GAPDH	26.3377
wt doxy n3	GAPDH	26.6146
wt doxy n3	GAPDH	26.6854
wt doxy n3	GAPDH	26.639
AA doxy n1	GAPDH	26.9892
AA doxy n1	GAPDH	26.9426
AA doxy n1	GAPDH	27.0525
AA doxy n2	GAPDH	26.4553
AA doxy n2	GAPDH	26.538
AA doxy n2	GAPDH	26.4842
AA doxy n3	GAPDH	26.7108
AA doxy n3	GAPDH	25.4576
AA doxy n3	GAPDH	26.801
WT Ctrl n1	CCNF	23.073
WT Ctrl n1	CCNF	23.0919
WT Ctrl n1	CCNF	23.1135
wt ctrl n2	CCNF	22.7318
wt ctrl n2	CCNF	22.8017
wt ctrl n2	CCNF	22.9234
wt ctrl n3	CCNF	23.2066
wt ctrl n3	CCNF	23.3214
wt ctrl n3	CCNF	23.2471
AA ctrl n1	CCNF	23.1825
AA ctrl n1	CCNF	23.2737
AA ctrl n1	CCNF	23.3639
AA ctrl n2	CCNF	23.2005
AA ctrl n2	CCNF	23.2985
AA ctrl n2	CCNF	23.4688
AA ctrl n3	CCNF	23.6481
AA ctrl n3	CCNF	23.729
AA ctrl n3	CCNF	23.6512
WT doxy n1	CCNF	25.8724
WT doxy n1	CCNF	25.7944
WT doxy n1	CCNF	25.9953
wt doxy n2	CCNF	24.8
wt doxy n2	CCNF	24.8834
wt doxy n2	CCNF	24.807
wt doxy n3	CCNF	26.1478
wt doxy n3	CCNF	25.7165
wt doxy n3	CCNF	25.4043
AA doxy n1	CCNF	28.1293
AA doxy n1	CCNF	27.9948
AA doxy n1	CCNF	28.0872
AA doxy n2	CCNF	28.0397
AA doxy n2	CCNF	28.214
AA doxy n2	CCNF	28.2297
AA doxy n3	CCNF	28.4182
AA doxy n3	CCNF	28.4668
AA doxy n3	CCNF	28.4924
WT Ctrl n1	CCNE	26.5827
WT Ctrl n1	CCNE	26.4946
WT Ctrl n1	CCNE	26.5956
wt ctrl n2	CCNE	26.269
wt ctrl n2	CCNE	26.3784
wt ctrl n2	CCNE	26.3319
wt ctrl n3	CCNE	26.9165
wt ctrl n3	CCNE	26.7183
wt ctrl n3	CCNE	26.7019
AA ctrl n1	CCNE	26.9647
AA ctrl n1	CCNE	27.0272
AA ctrl n1	CCNE	26.9773
AA ctrl n2	CCNE	26.6221
AA ctrl n2	CCNE	26.8511
AA ctrl n2	CCNE	26.8908
AA ctrl n3	CCNE	27.2188
AA ctrl n3	CCNE	27.3892
AA ctrl n3	CCNE	27.1844
WT doxy n1	CCNE	29.2426
WT doxy n1	CCNE	29.0861
WT doxy n1	CCNE	29.0833
wt doxy n2	CCNE	28.2224
wt doxy n2	CCNE	28.2314
wt doxy n2	CCNE	28.1697
wt doxy n3	CCNE	29.6467
wt doxy n3	CCNE	29.4024
wt doxy n3	CCNE	29.594
AA doxy n1	CCNE	31.4913
AA doxy n1	CCNE	31.4717
AA doxy n1	CCNE	31.2805
AA doxy n2	CCNE	31.3245
AA doxy n2	CCNE	31.6363
AA doxy n2	CCNE	31.7724
AA doxy n3	CCNE	31.6784
AA doxy n3	CCNE	31.9728
AA doxy n3	CCNE	31.3584
WT Ctrl n1	CDC6	23.6879
WT Ctrl n1	CDC6	23.6523
WT Ctrl n1	CDC6	23.7488
wt ctrl n2	CDC6	23.5933
wt ctrl n2	CDC6	23.5612
wt ctrl n2	CDC6	23.8851
wt ctrl n3	CDC6	23.974
wt ctrl n3	CDC6	23.9759
wt ctrl n3	CDC6	24.0607
AA ctrl n1	CDC6	24.034
AA ctrl n1	CDC6	24.3868
AA ctrl n1	CDC6	24.0679
AA ctrl n2	CDC6	23.0808
AA ctrl n2	CDC6	23.9933
AA ctrl n2	CDC6	23.1871
AA ctrl n3	CDC6	24.3939
AA ctrl n3	CDC6	24.2688
AA ctrl n3	CDC6	24.3068
WT doxy n1	CDC6	26.503
WT doxy n1	CDC6	26.2114
WT doxy n1	CDC6	26.3646
wt doxy n2	CDC6	25.3549
wt doxy n2	CDC6	25.3446
wt doxy n2	CDC6	25.303
wt doxy n3	CDC6	26.4131
wt doxy n3	CDC6	26.3975
wt doxy n3	CDC6	26.4999
AA doxy n1	CDC6	27.9761
AA doxy n1	CDC6	28.4879
AA doxy n1	CDC6	28.4673
AA doxy n2	CDC6	28.579
AA doxy n2	CDC6	28.5918
AA doxy n2	CDC6	28.6658
AA doxy n3	CDC6	28.8054
AA doxy n3	CDC6	28.7213
AA doxy n3	CDC6	28.5865
WT Ctrl n1	DHFR	22.8953
WT Ctrl n1	DHFR	22.9429
WT Ctrl n1	DHFR	22.8594
wt ctrl n2	DHFR	22.732
wt ctrl n2	DHFR	22.5728
wt ctrl n2	DHFR	22.5793
wt ctrl n3	DHFR	22.9859
wt ctrl n3	DHFR	23.1118
wt ctrl n3	DHFR	23.038
AA ctrl n1	DHFR	23.0729
AA ctrl n1	DHFR	22.9165
AA ctrl n1	DHFR	22.9812
AA ctrl n2	DHFR	22.5973
AA ctrl n2	DHFR	22.6763
AA ctrl n2	DHFR	22.9496
AA ctrl n3	DHFR	23.2661
AA ctrl n3	DHFR	23.1073
AA ctrl n3	DHFR	23.2247
WT doxy n1	DHFR	25.4187
WT doxy n1	DHFR	25.4703
WT doxy n1	DHFR	25.4138
wt doxy n2	DHFR	24.3835
wt doxy n2	DHFR	24.4252
wt doxy n2	DHFR	24.4592
wt doxy n3	DHFR	25.536
wt doxy n3	DHFR	25.4687
wt doxy n3	DHFR	25.5636
AA doxy n1	DHFR	27.6252
AA doxy n1	DHFR	27.6063
AA doxy n1	DHFR	27.7361
AA doxy n2	DHFR	27.632
AA doxy n2	DHFR	27.6898
AA doxy n2	DHFR	27.8936
AA doxy n3	DHFR	27.9137
AA doxy n3	DHFR	27.8543
AA doxy n3	DHFR	27.7763
WT Ctrl n1	E2F1	23.1112
WT Ctrl n1	E2F1	23.0679
WT Ctrl n1	E2F1	23.2398
wt ctrl n2	E2F1	23.0519
wt ctrl n2	E2F1	22.9499
wt ctrl n2	E2F1	23.1365
wt ctrl n3	E2F1	23.384
wt ctrl n3	E2F1	23.4365
wt ctrl n3	E2F1	23.4226
AA ctrl n1	E2F1	23.3125
AA ctrl n1	E2F1	23.112
AA ctrl n1	E2F1	23.2378
AA ctrl n2	E2F1	23.1441
AA ctrl n2	E2F1	23.2252
AA ctrl n2	E2F1	23.1268
AA ctrl n3	E2F1	23.6081
AA ctrl n3	E2F1	23.7373
AA ctrl n3	E2F1	23.5922
WT doxy n1	E2F1	25.9157
WT doxy n1	E2F1	25.9413
WT doxy n1	E2F1	26.0325
wt doxy n2	E2F1	25.0262
wt doxy n2	E2F1	25.0566
wt doxy n2	E2F1	25.0939
wt doxy n3	E2F1	26.1019
wt doxy n3	E2F1	25.9962
wt doxy n3	E2F1	25.8995
AA doxy n1	E2F1	28.0589
AA doxy n1	E2F1	28.5448
AA doxy n1	E2F1	28.1931
AA doxy n2	E2F1	28.2542
AA doxy n2	E2F1	28.232
AA doxy n2	E2F1	28.3515
AA doxy n3	E2F1	28.6347
AA doxy n3	E2F1	28.3715
AA doxy n3	E2F1	28.5586
