# Supplementary figures and images for: Cyclin F drives proliferation through SCF-dependent degradation of the retinoblastoma-like tumor suppressor p130/RBL2
Source: eLife journal article supplement (doi:10.7554/elife.70691), 2021-12-01

# Enrico\_Fig4 S1\_Source Data 1 For Fig4 S1A

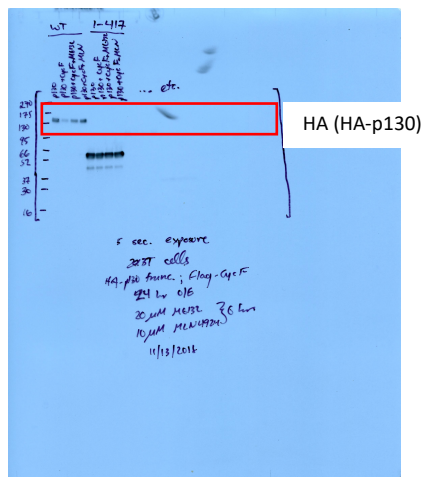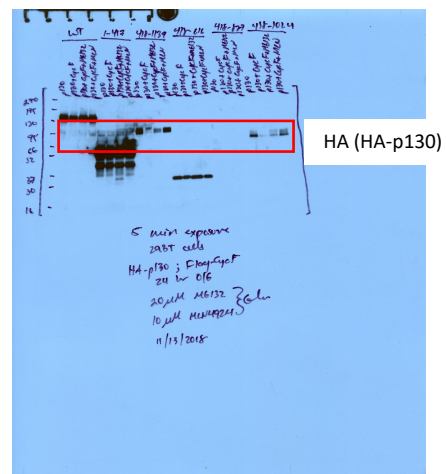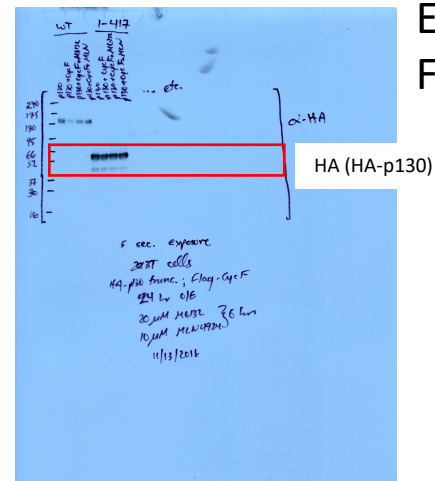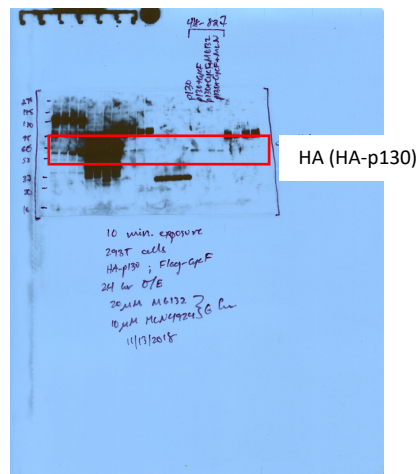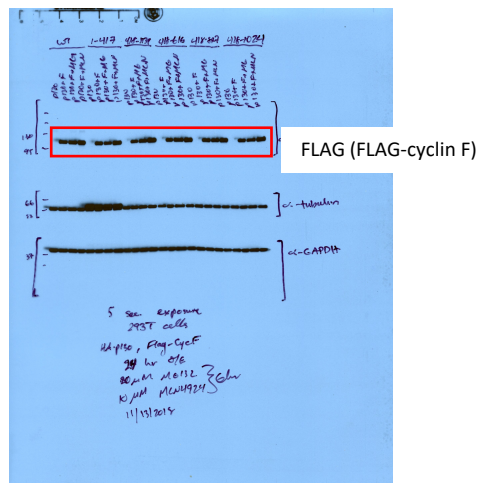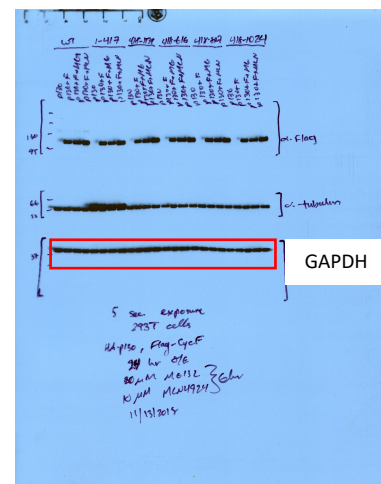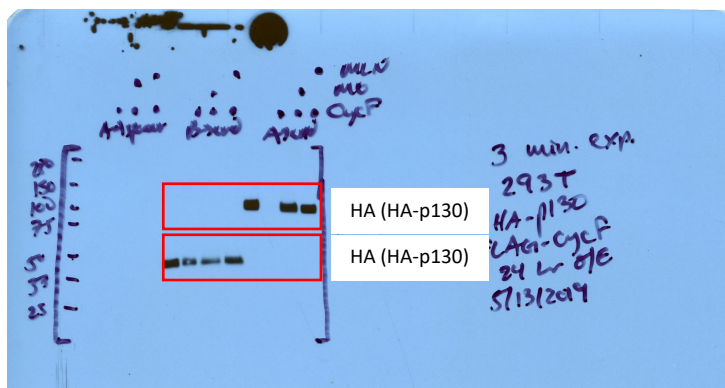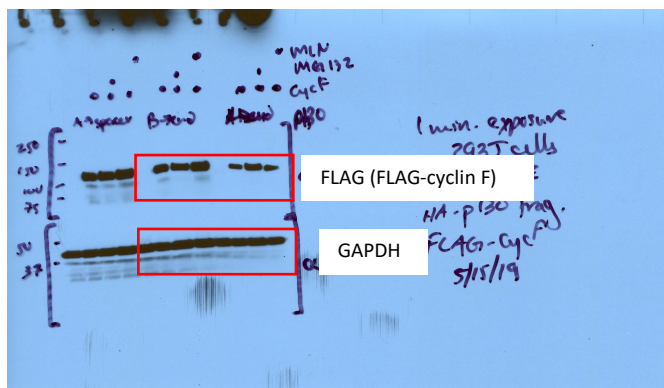

# Enrico\_Fig4 S1\_Source Data 2 For Fig4 S1A

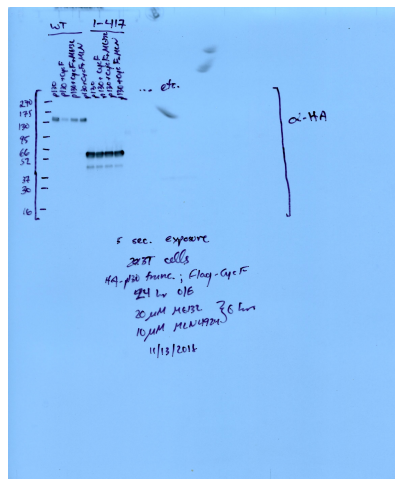

Supplement: supp2 [file elife-70691-supp2-v2.zip]

# Enrico\_Fig7 S2\_Source Data 1 For Fig7S2A

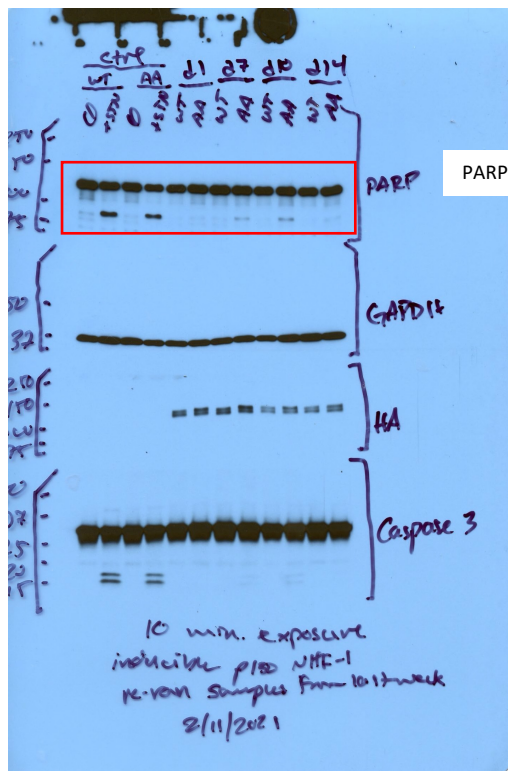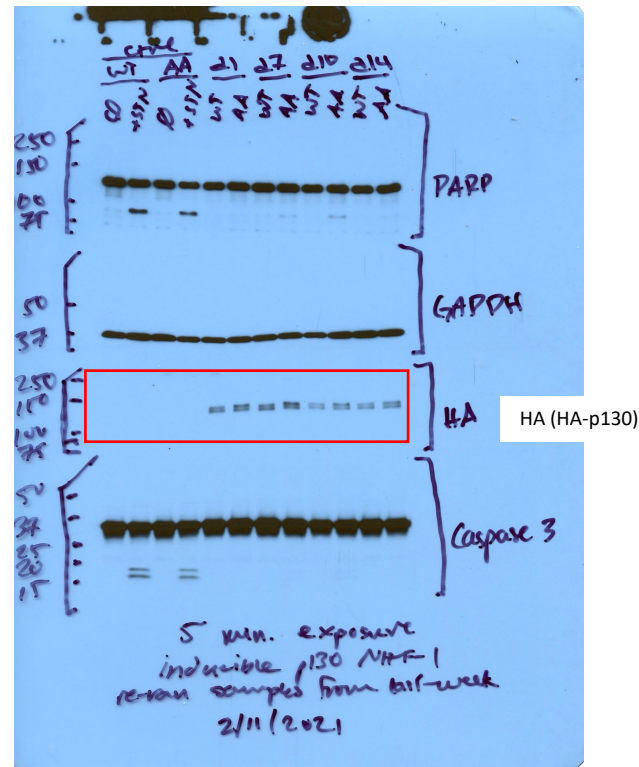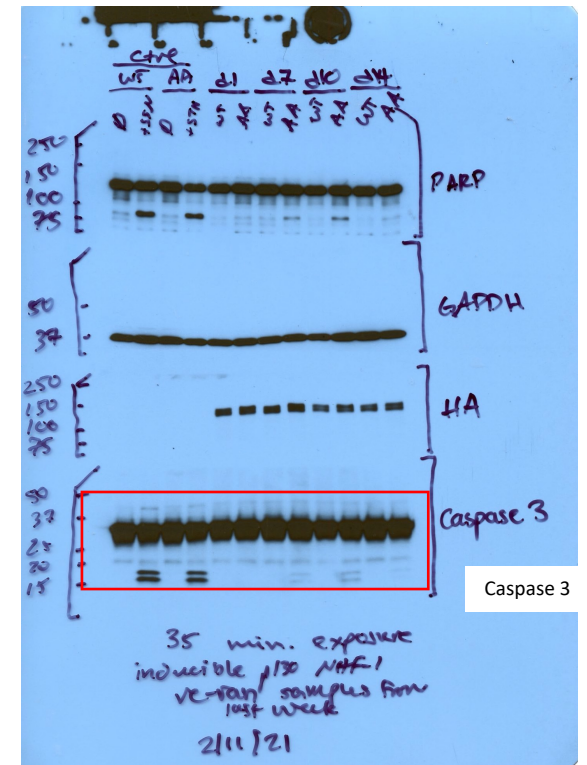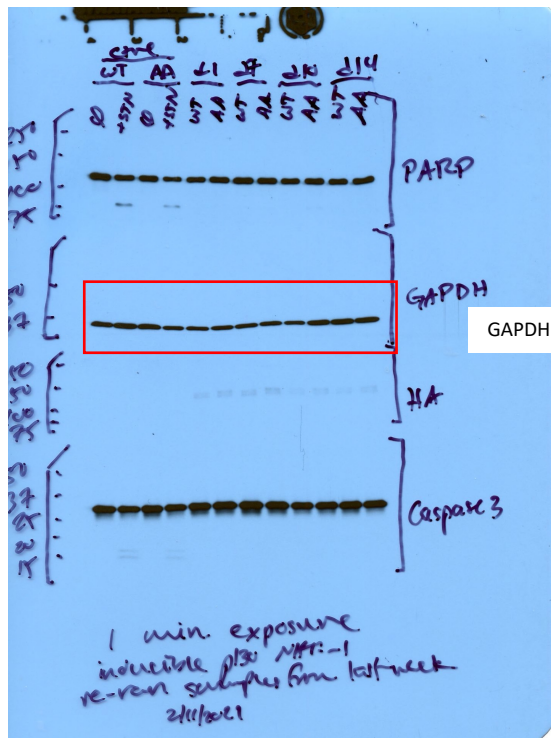

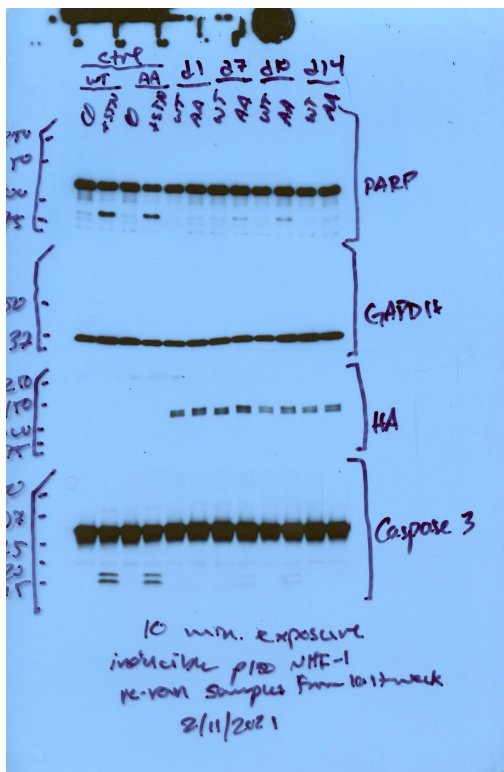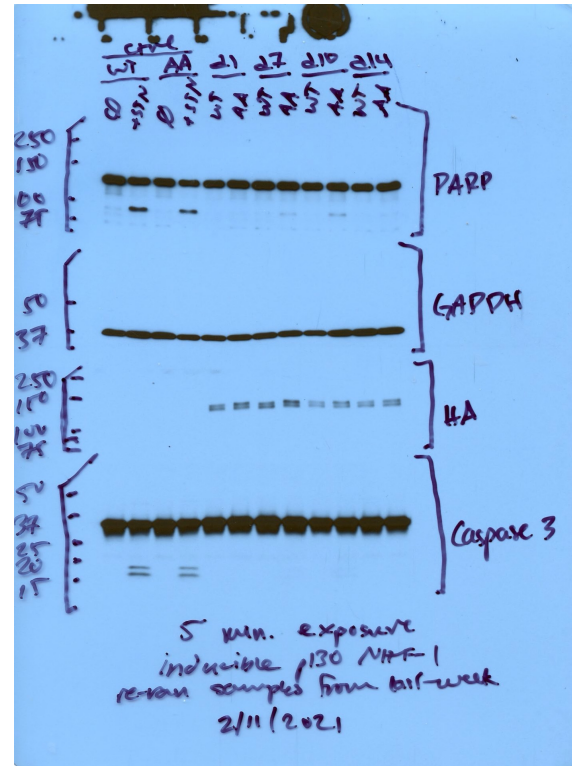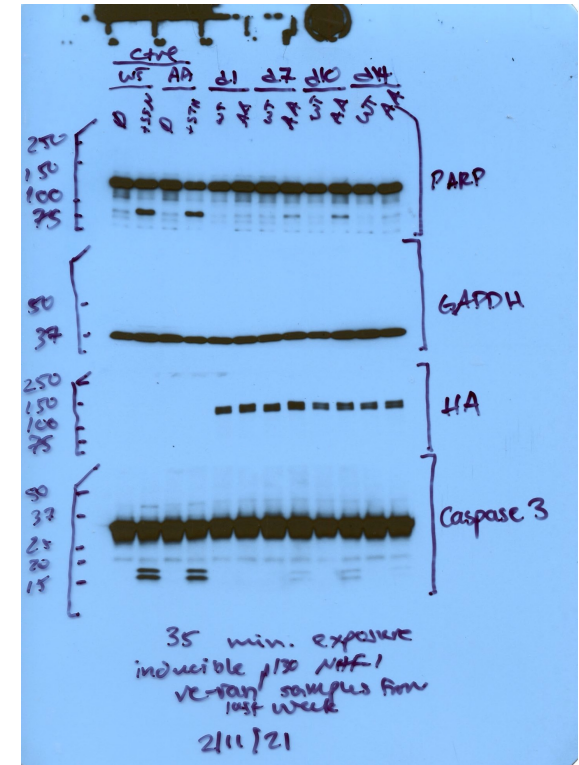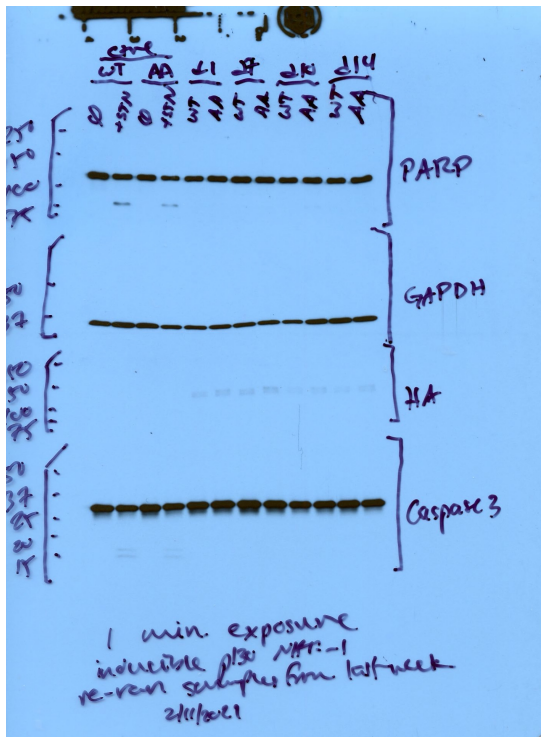

Supplement: supp2 [file elife-70691-supp2-v2.zip]

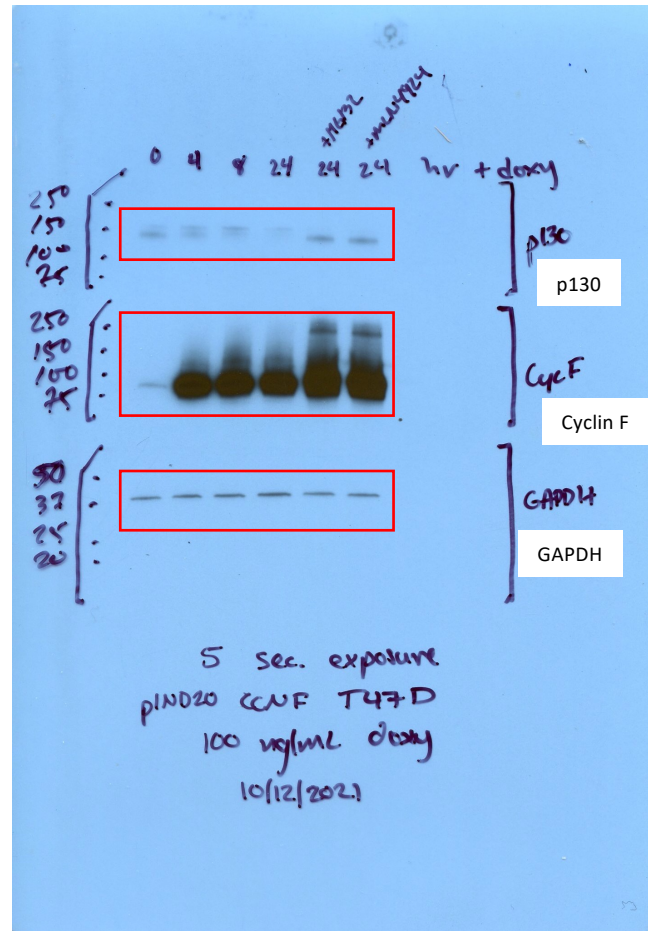

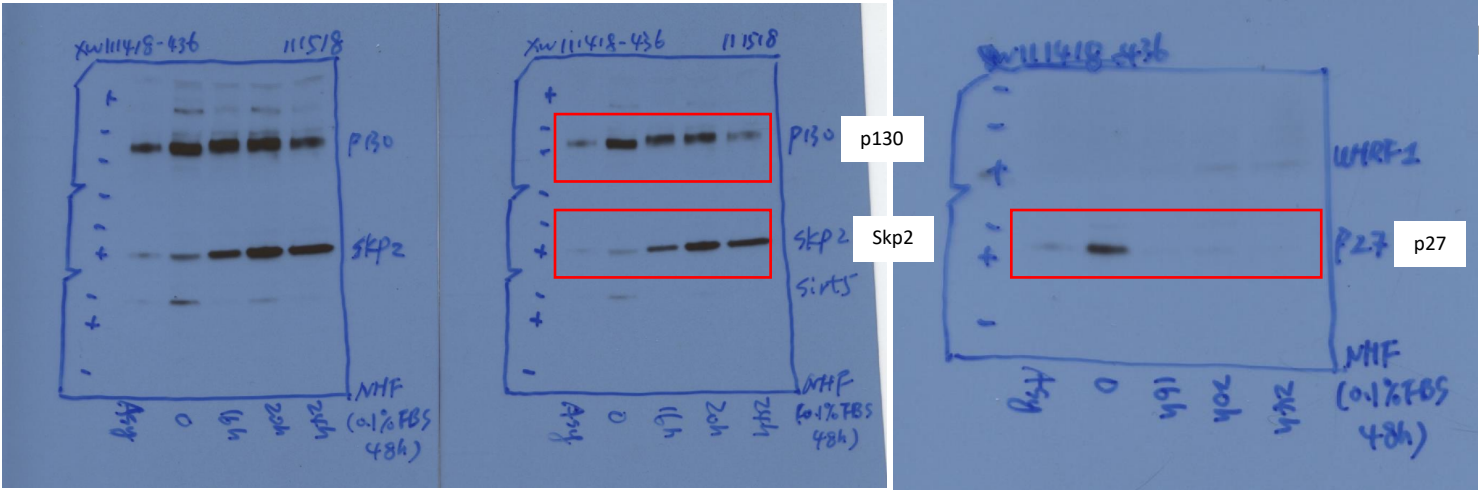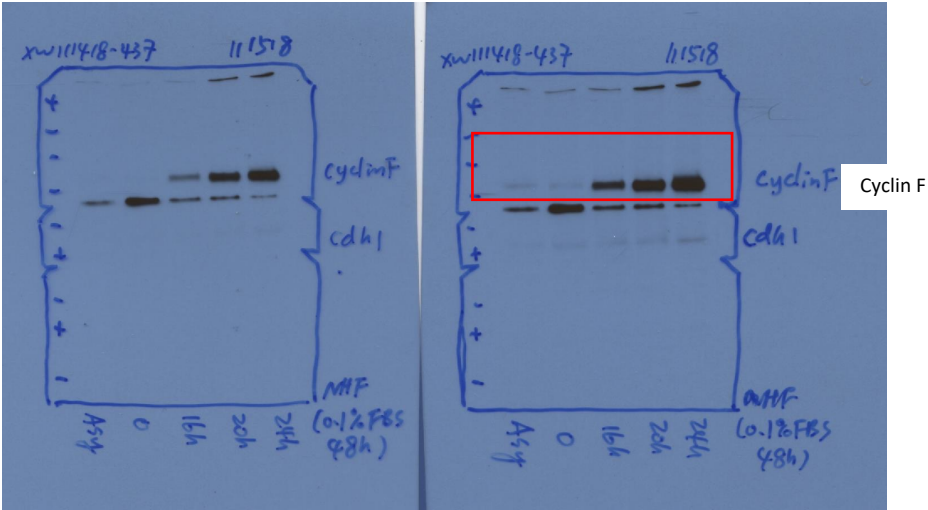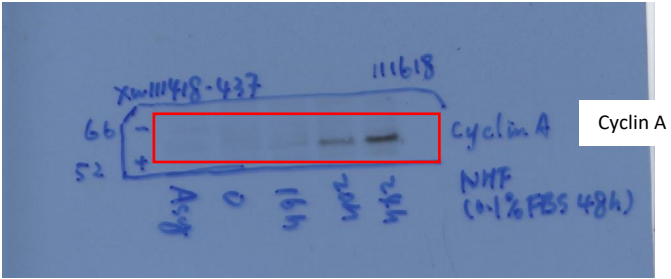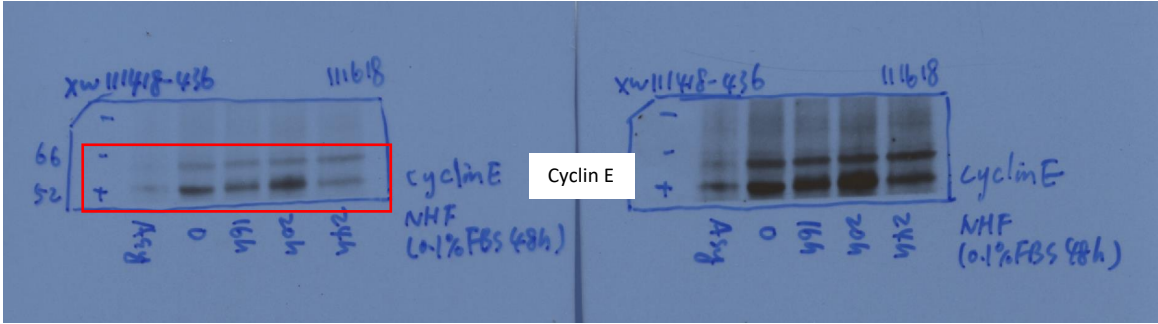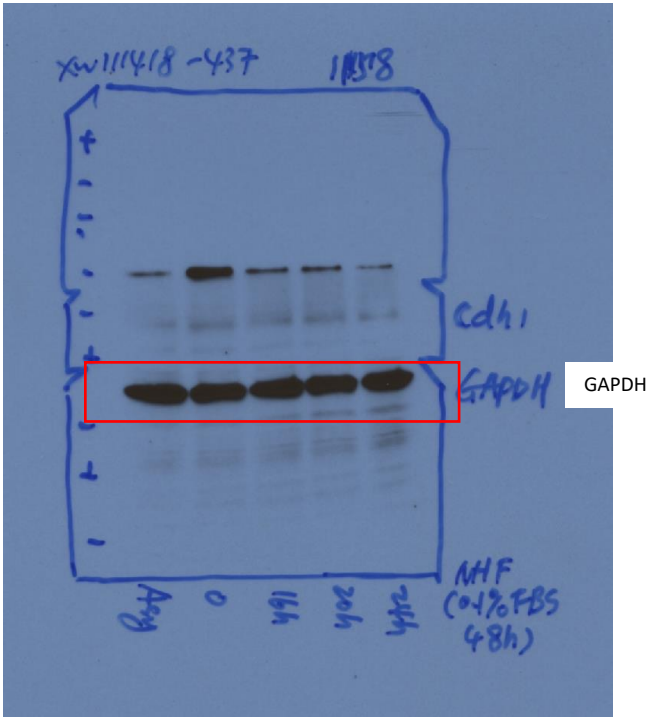



# Enrico\_Fig1 S3\_Source Data 3 For Fig1 S3D

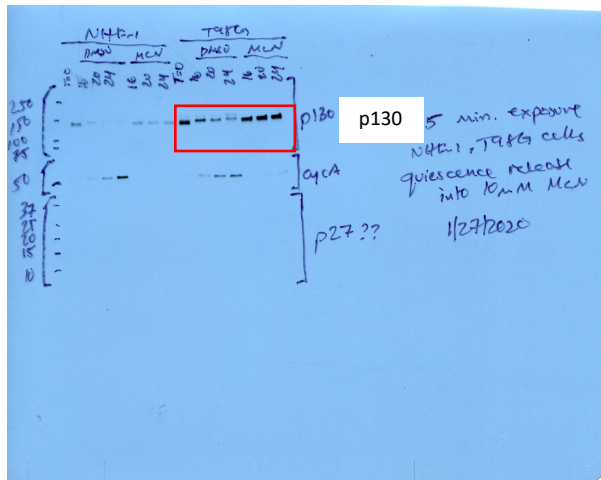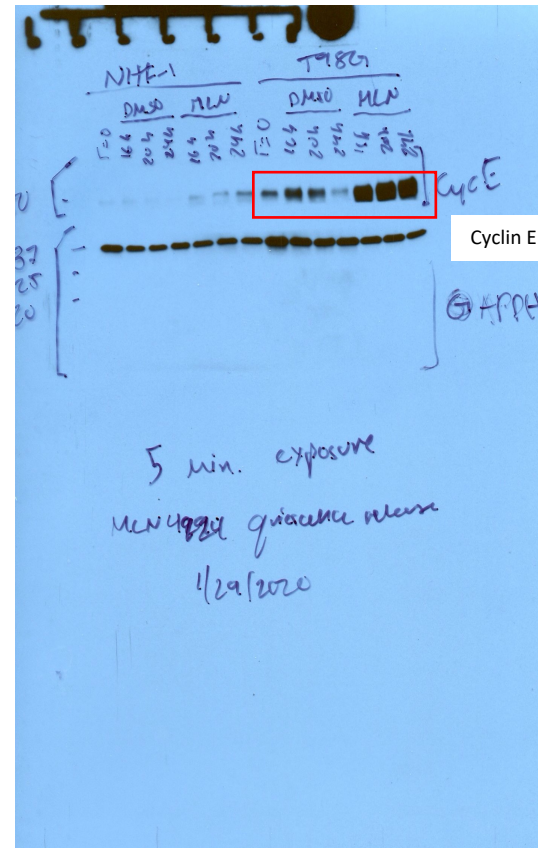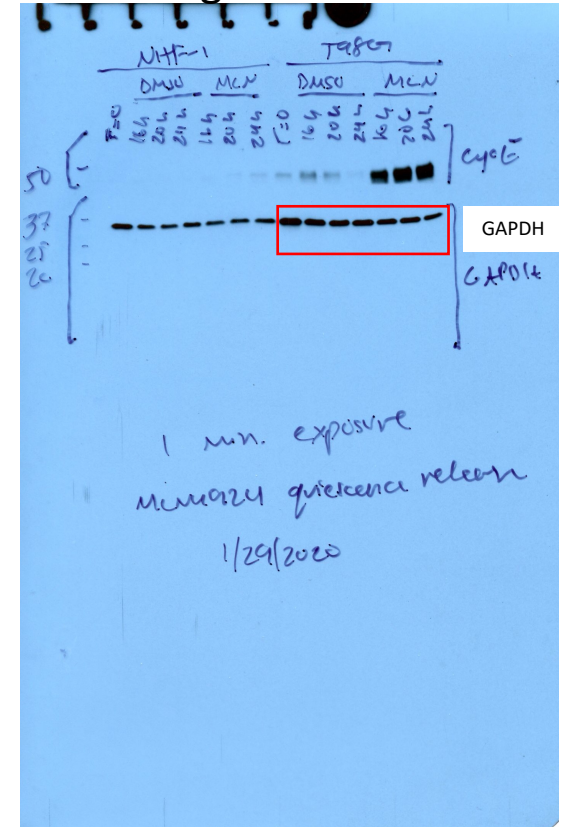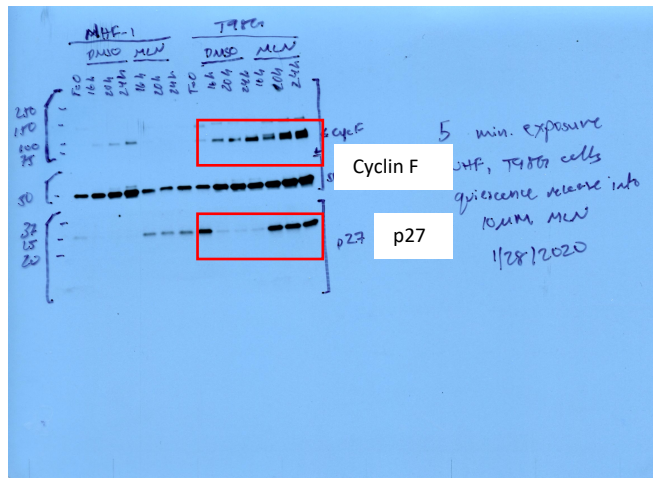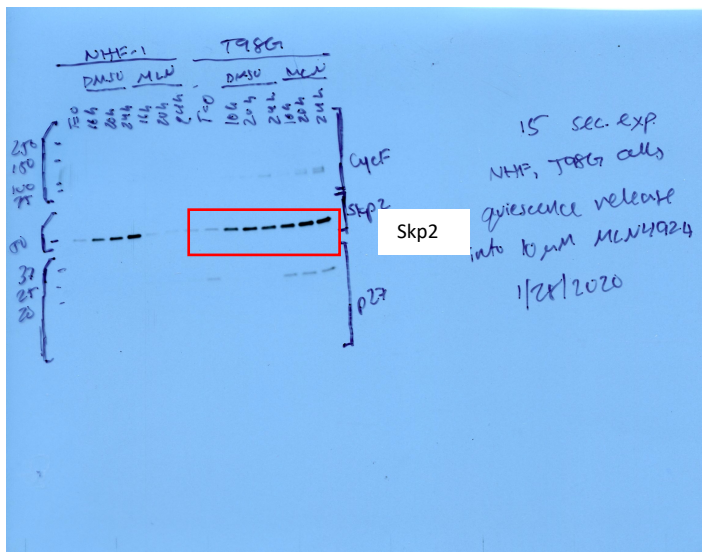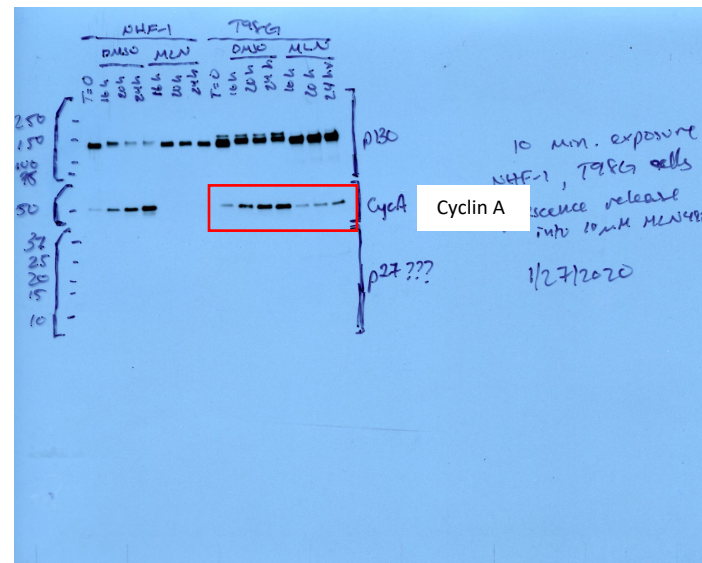

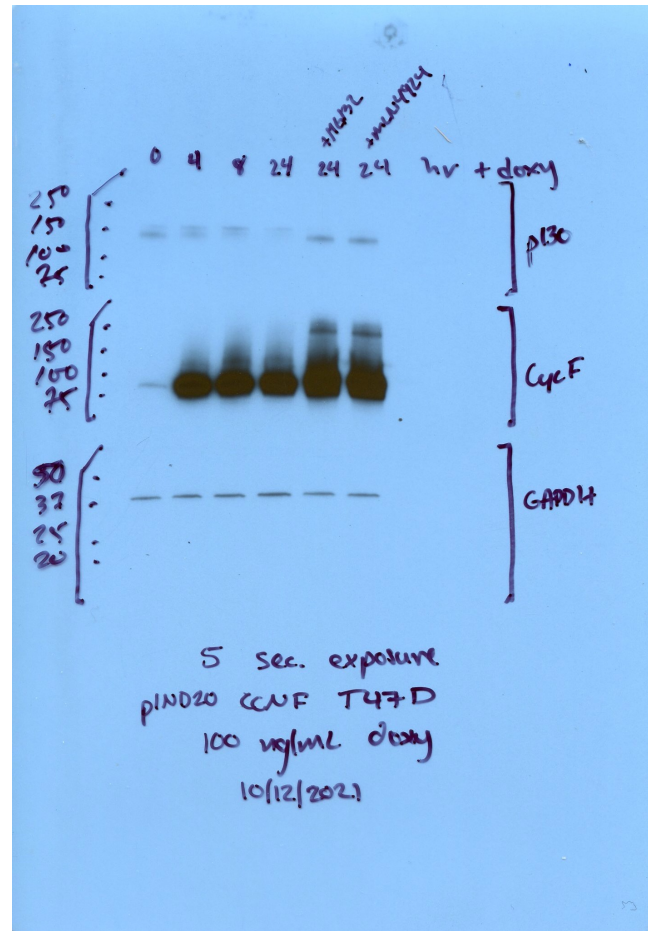



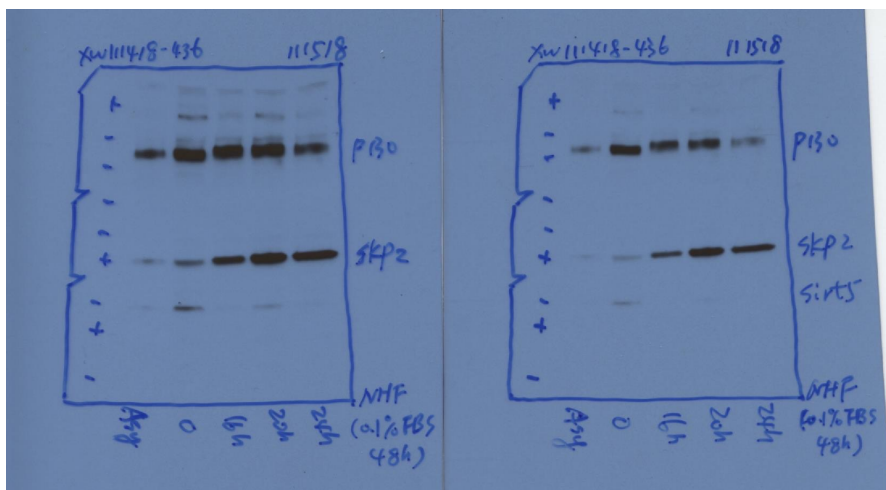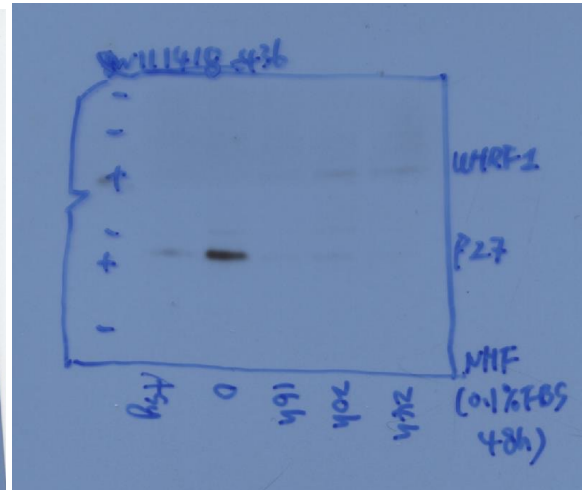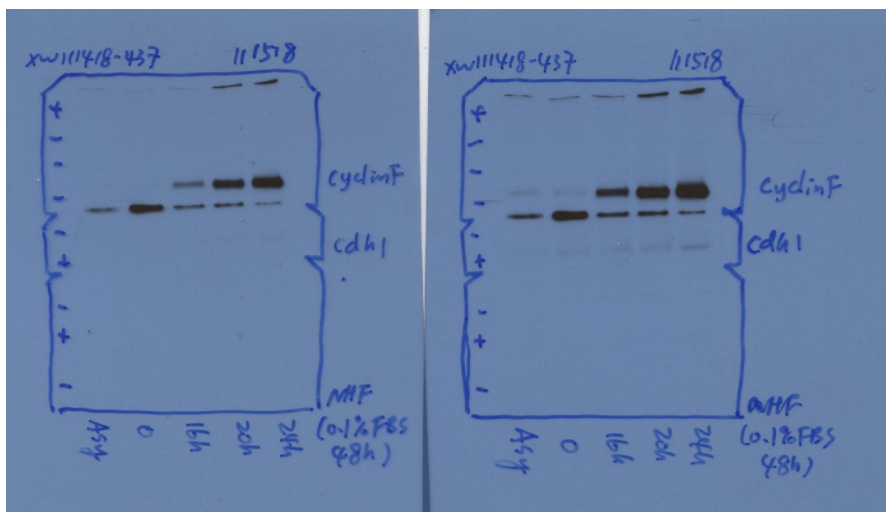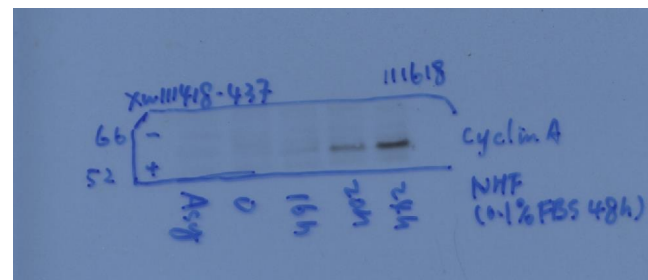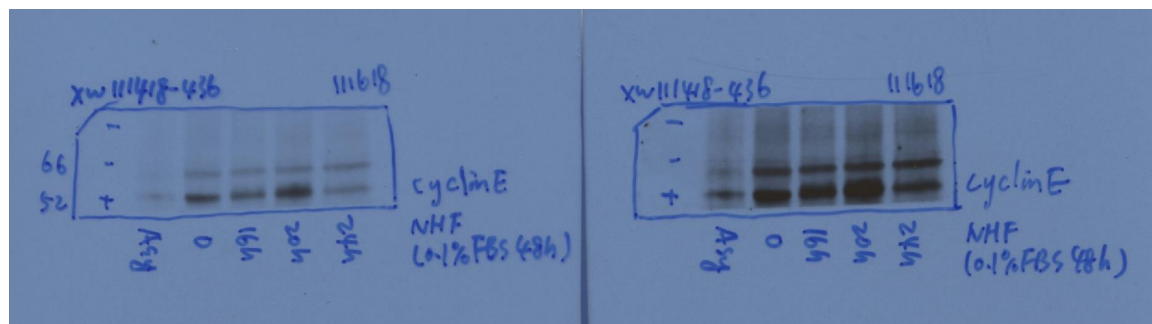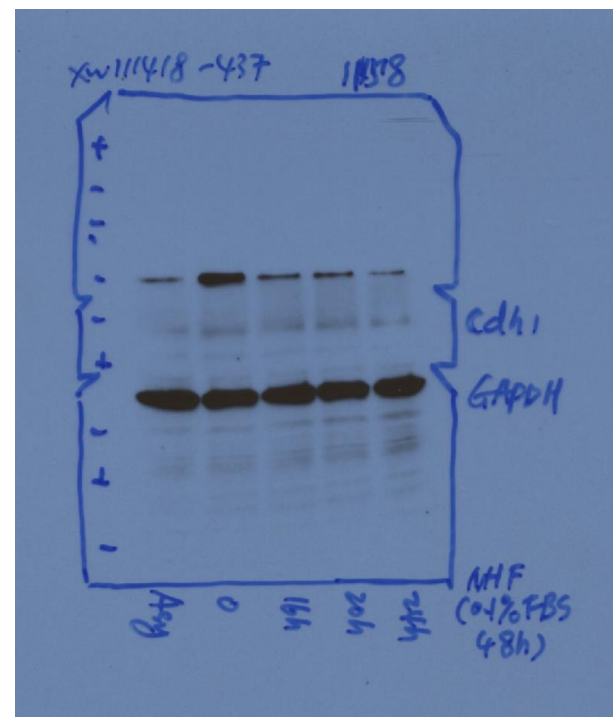

# Enrico\_Fig1 S3\_Source Data 6 For Fig1 S3D

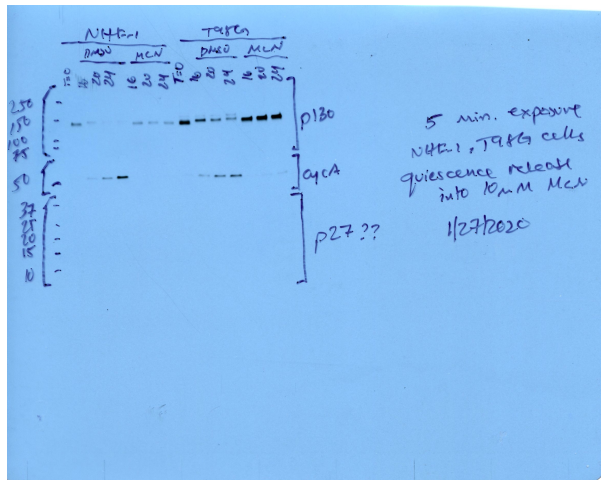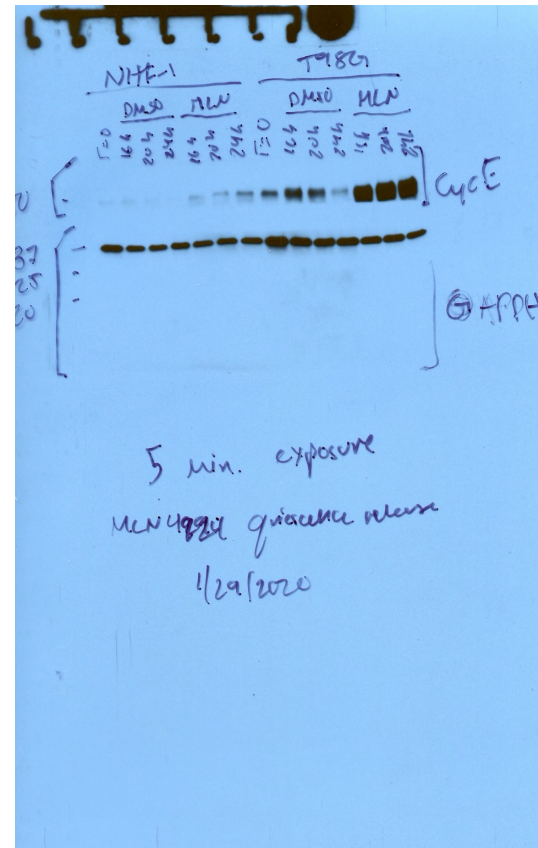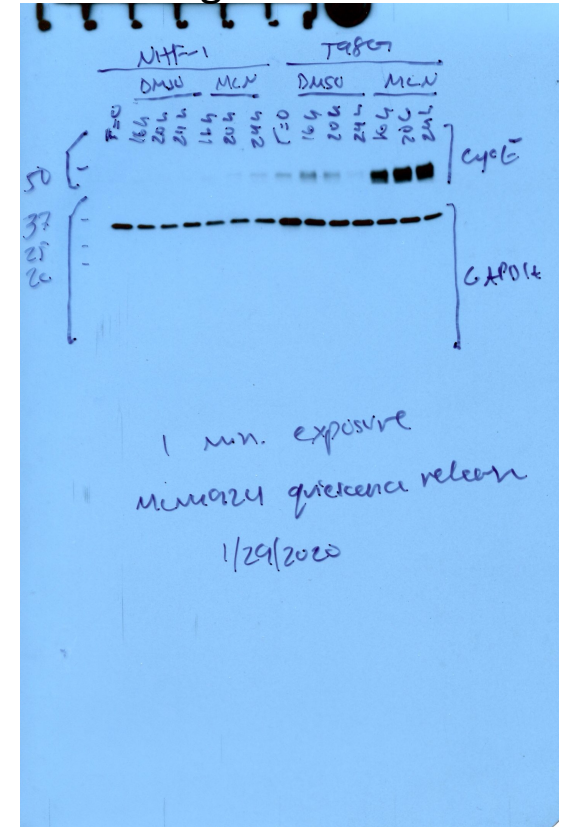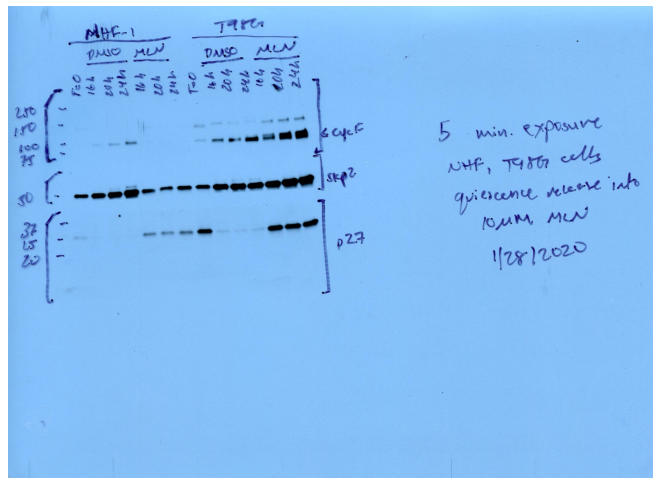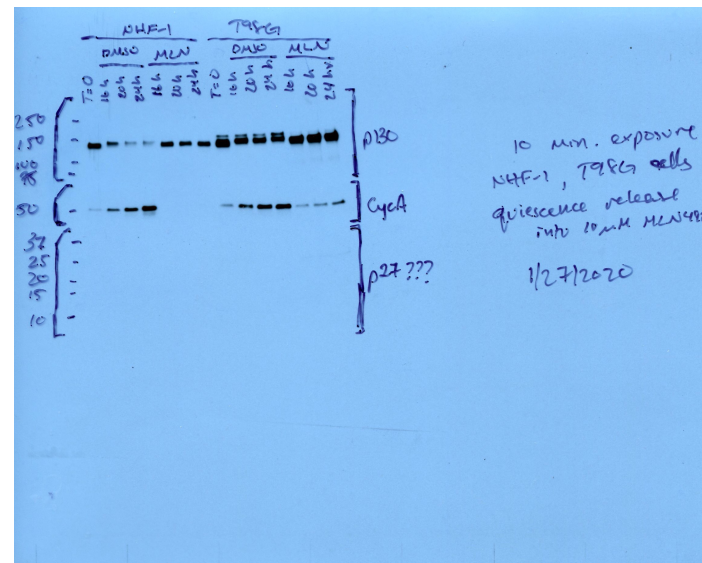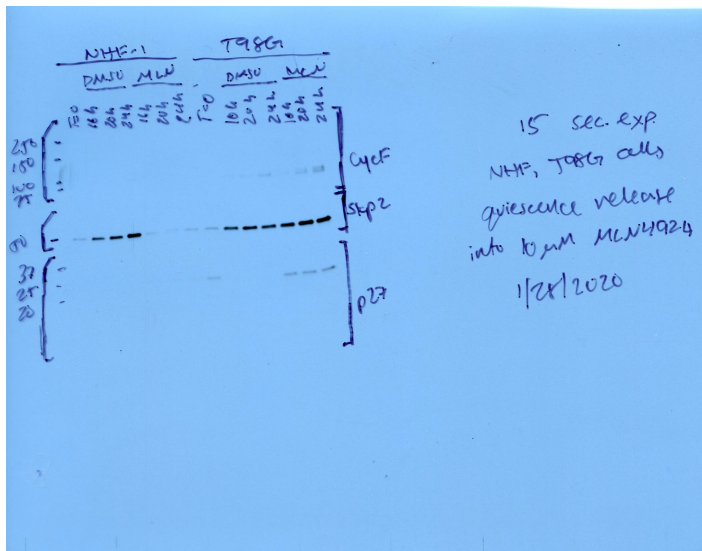

Supplement: supp2 [file elife-70691-supp2-v2.zip]

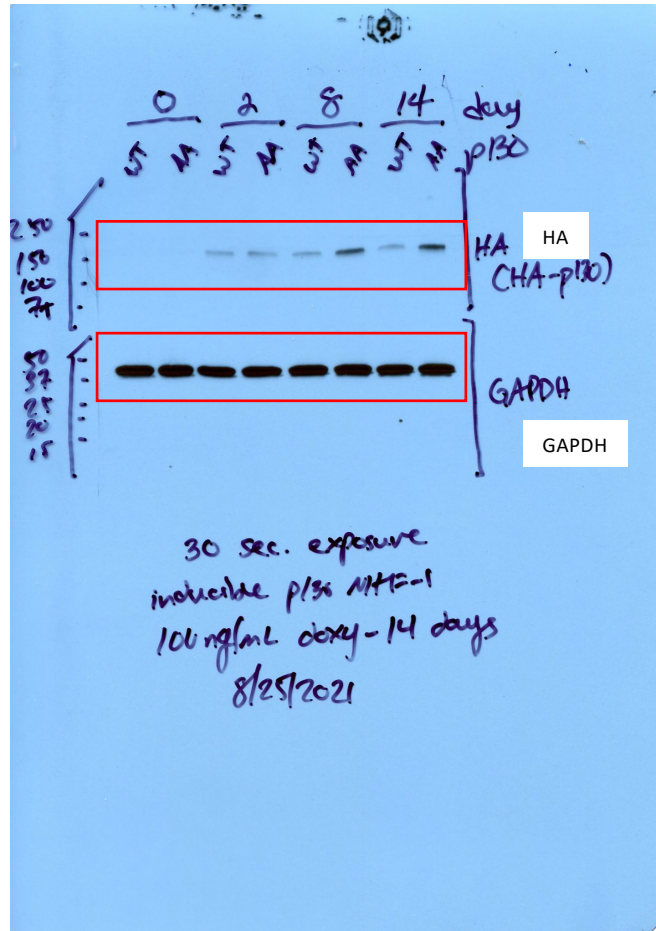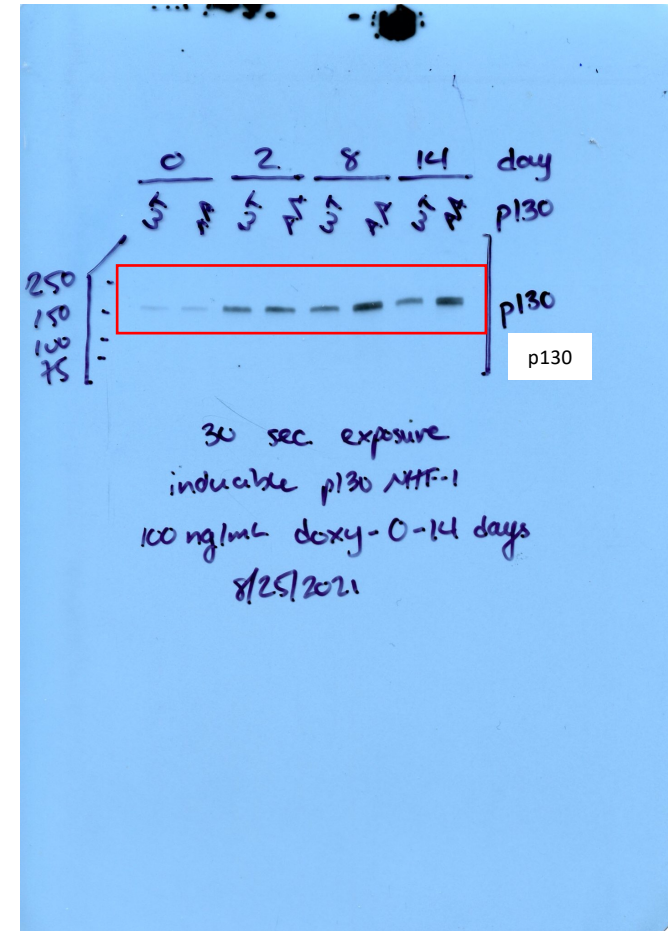

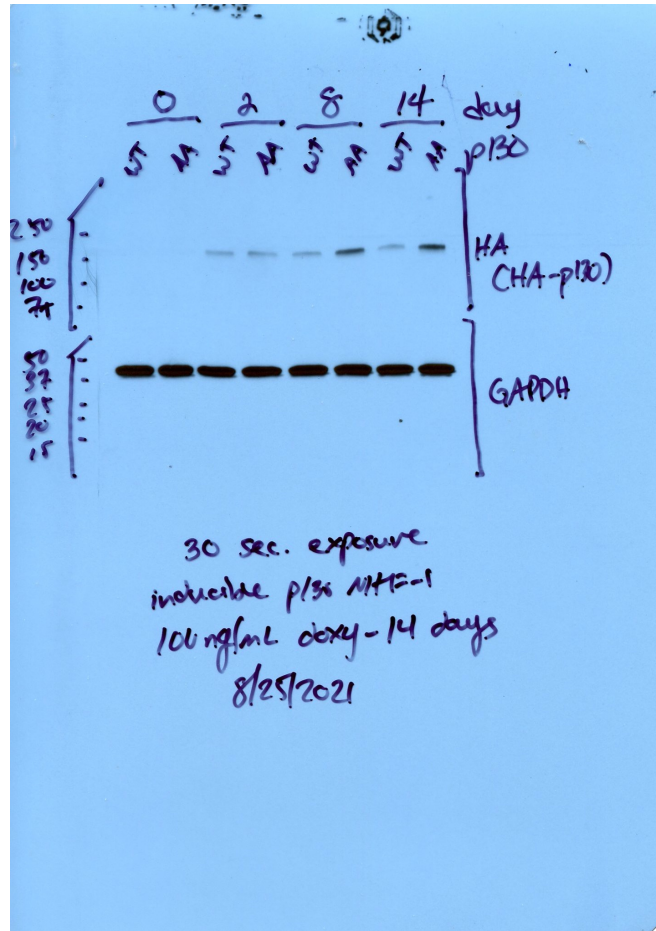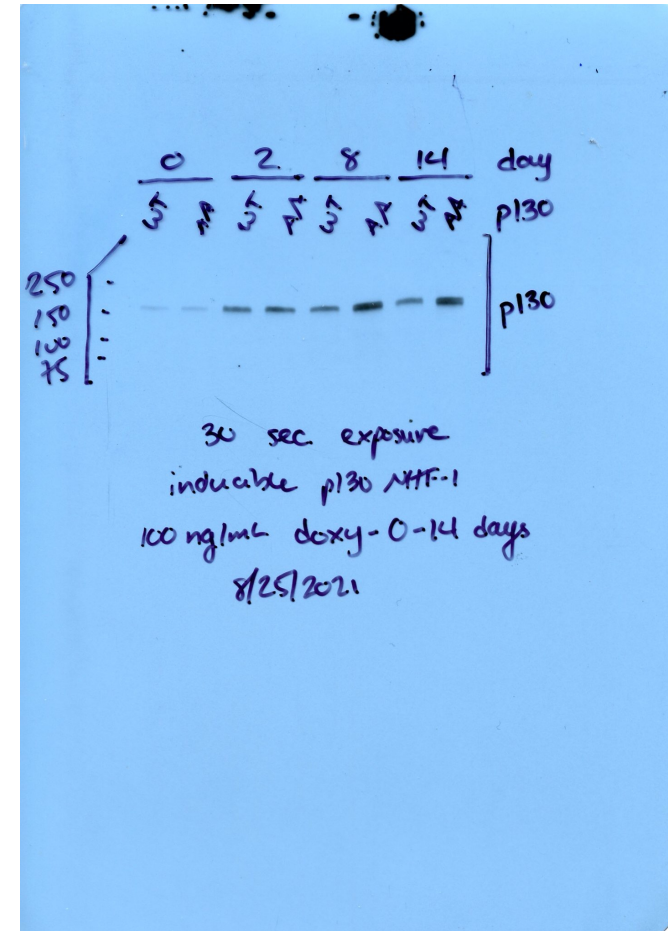

Supplement: supp2 [file elife-70691-supp2-v2.zip]

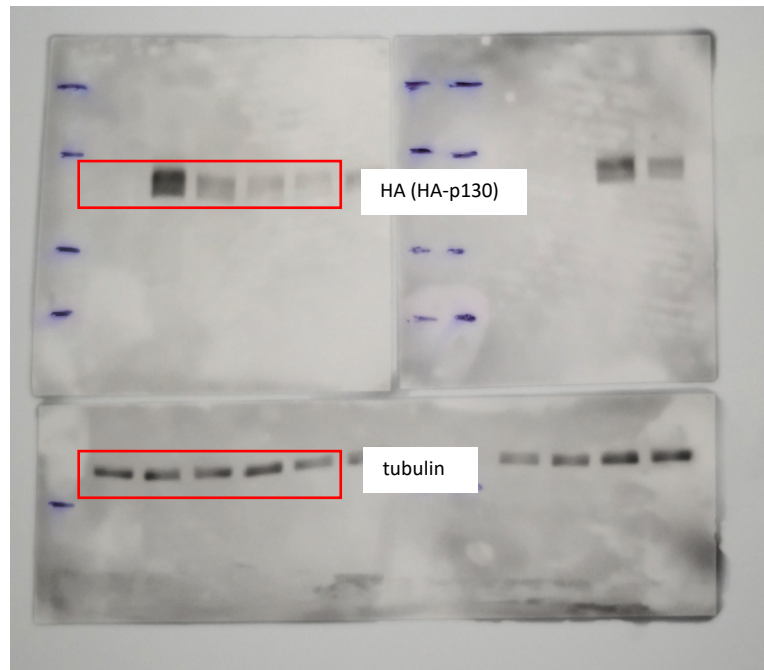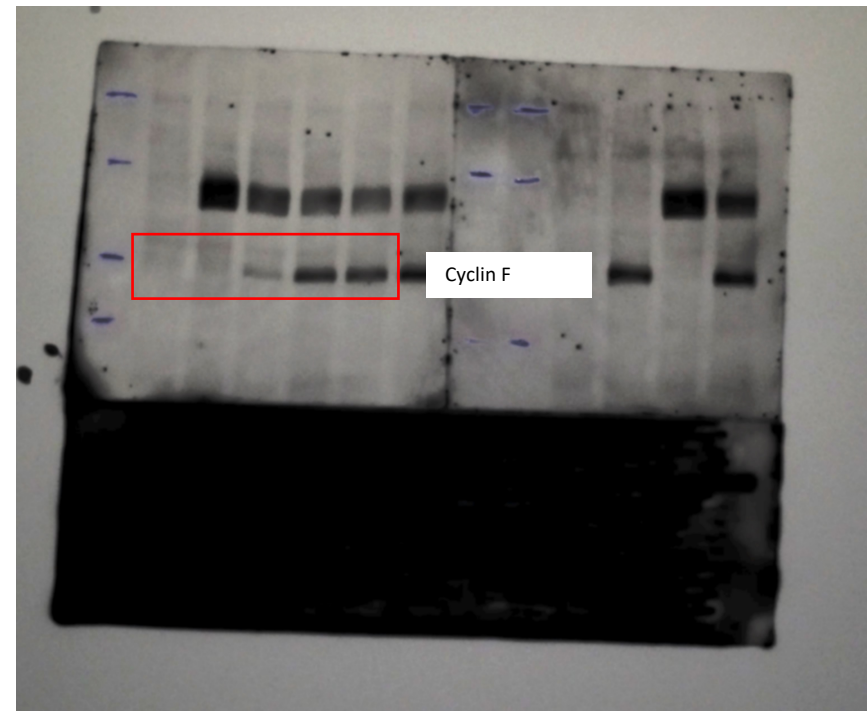

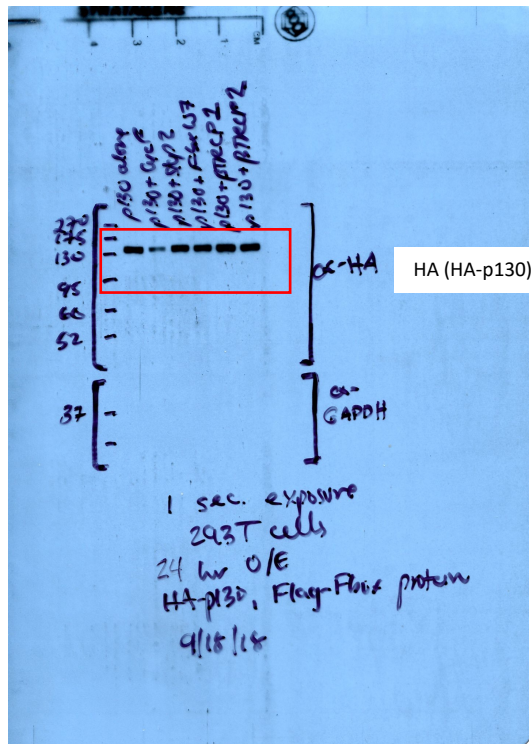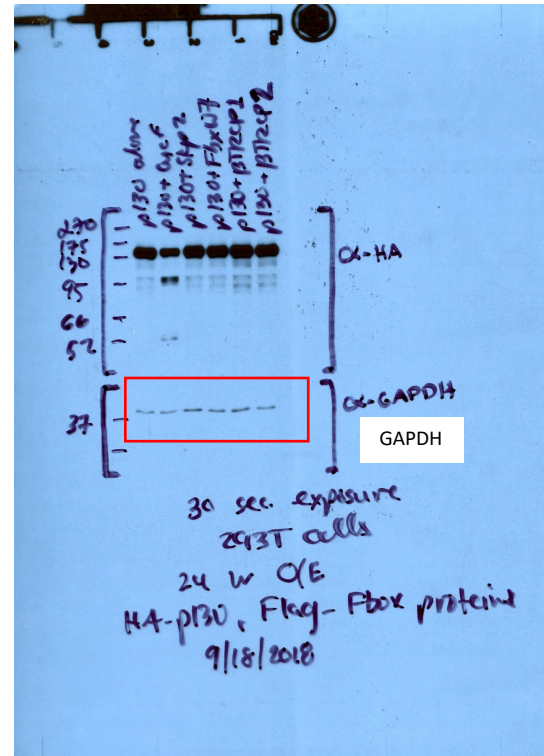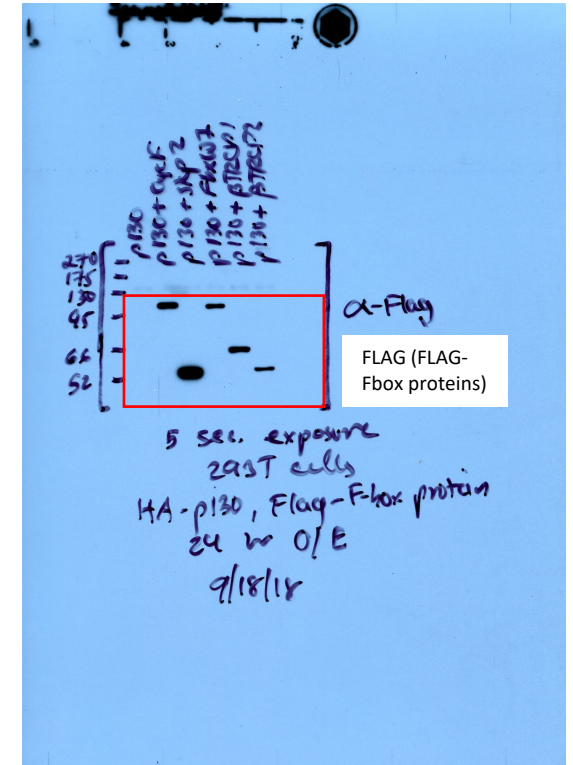

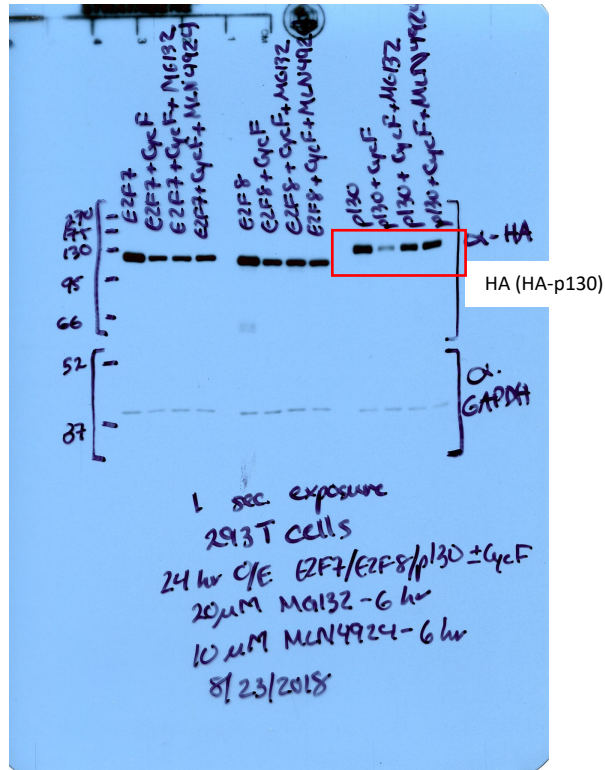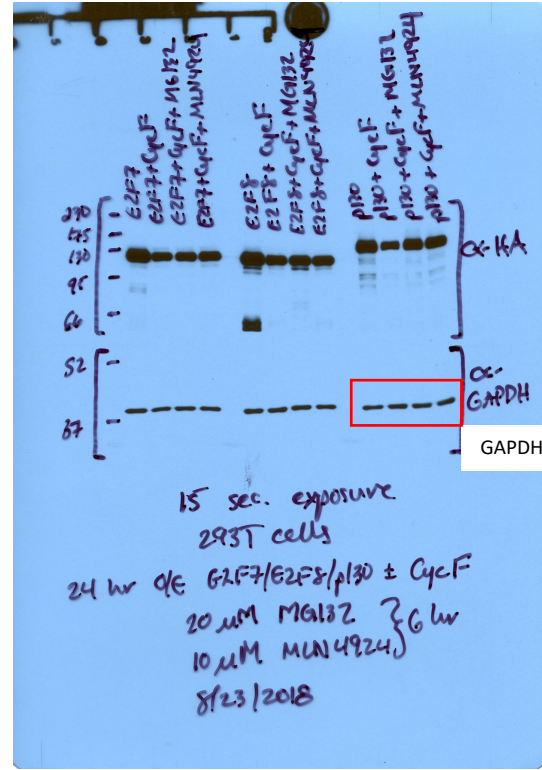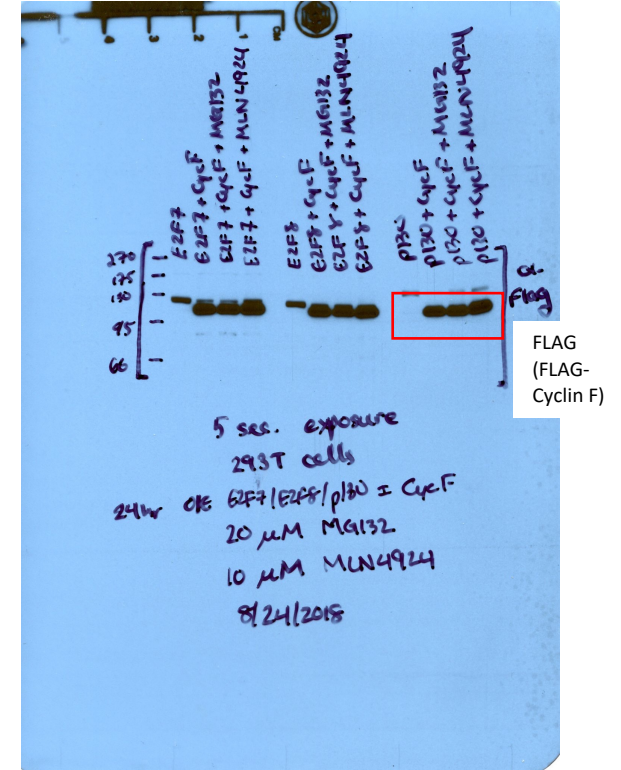



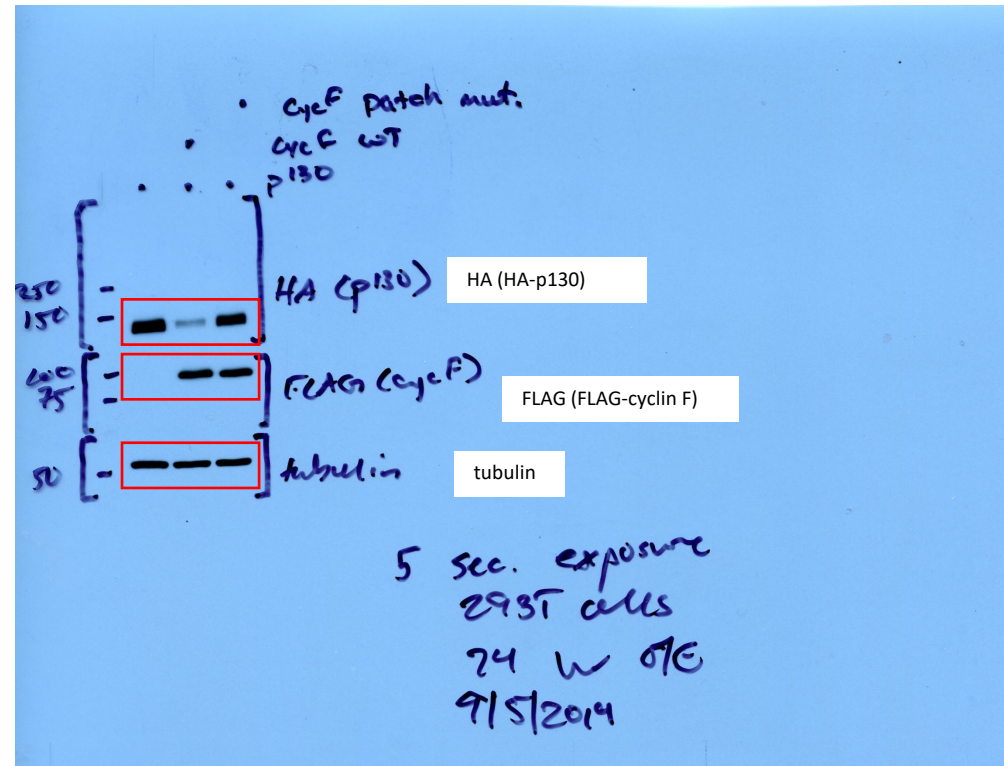

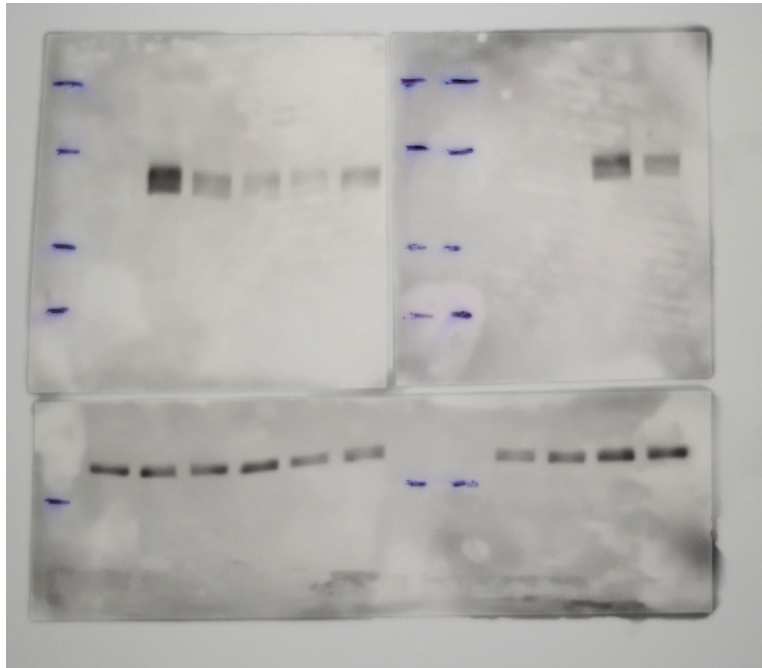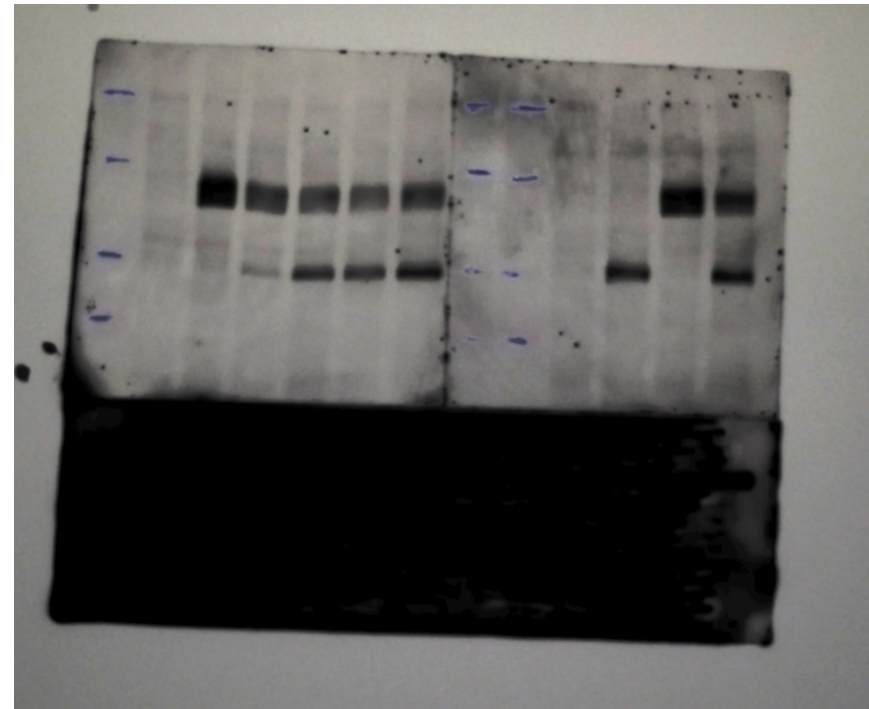

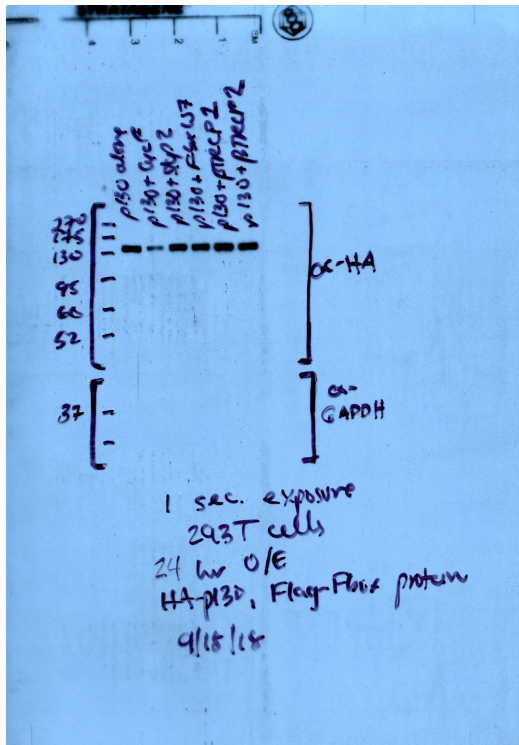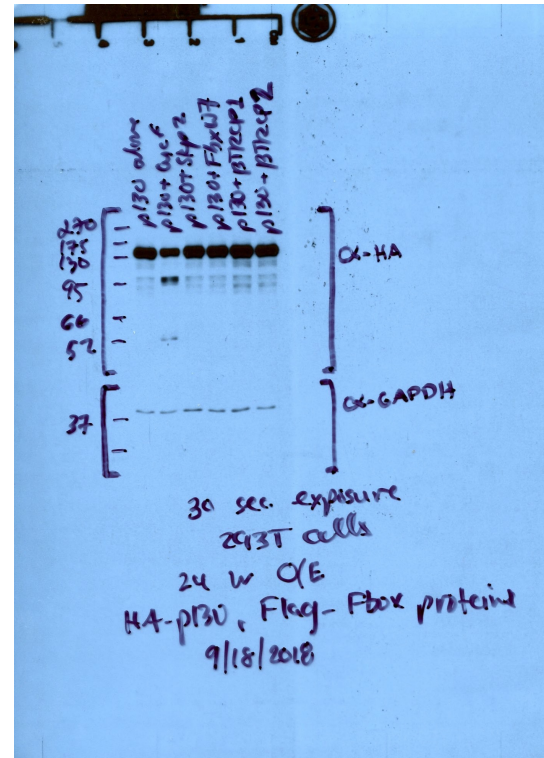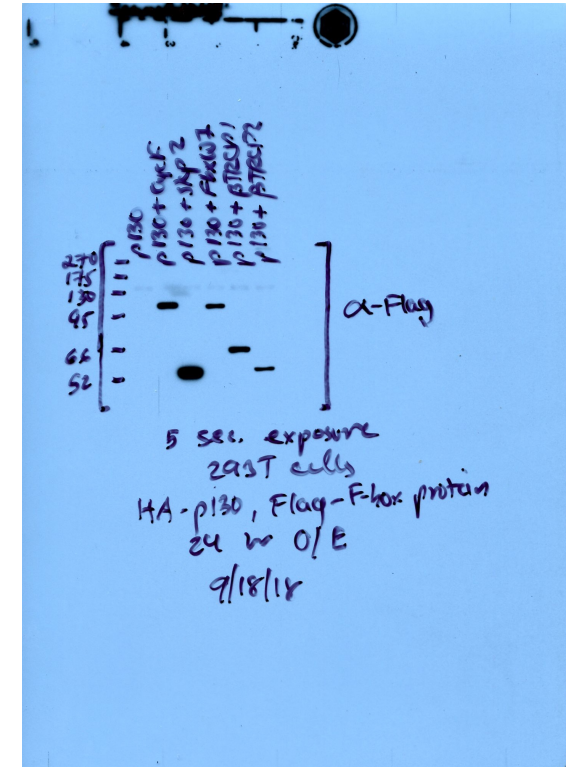



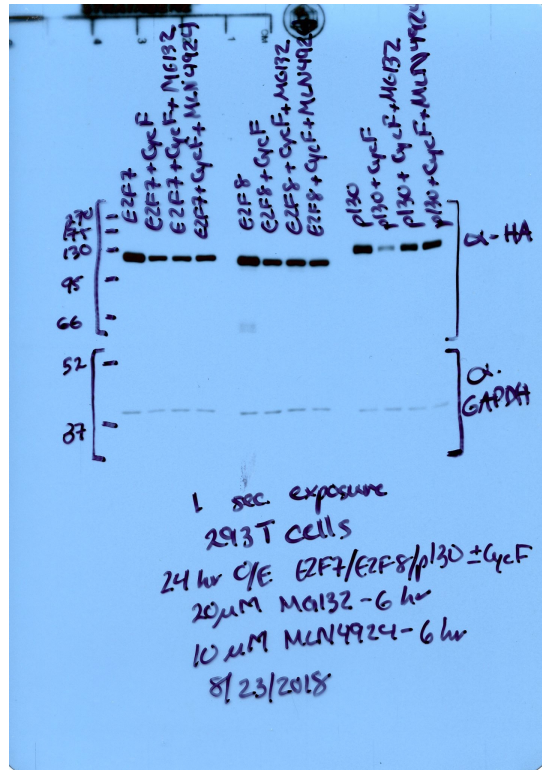

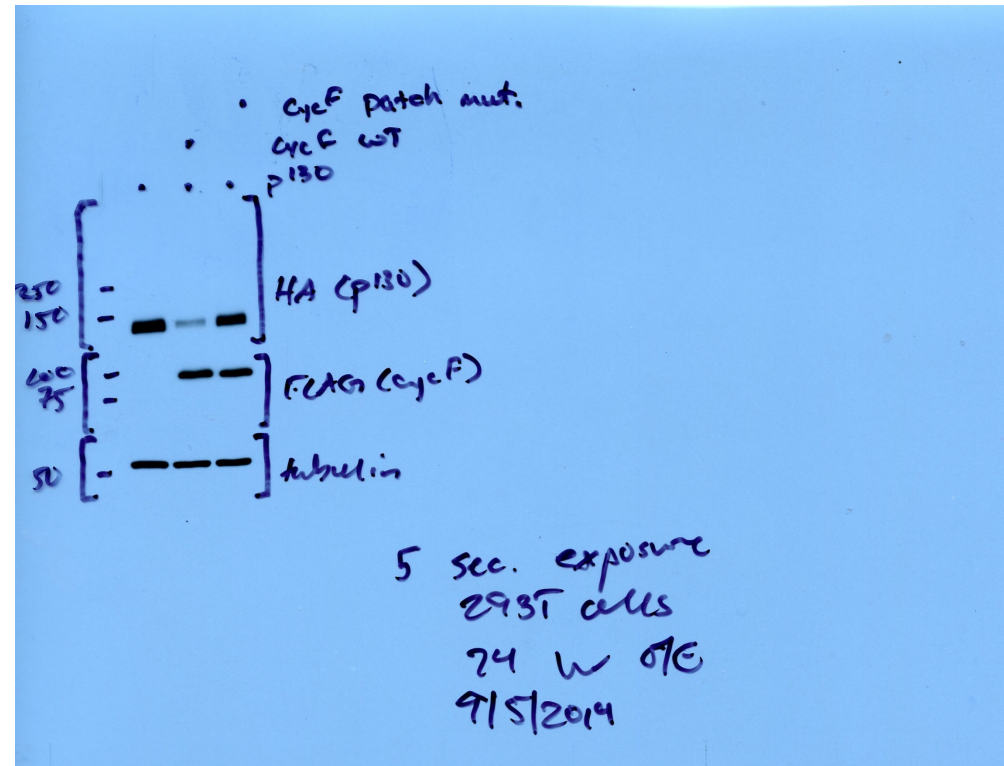

Supplement: supp2 [file elife-70691-supp2-v2.zip]

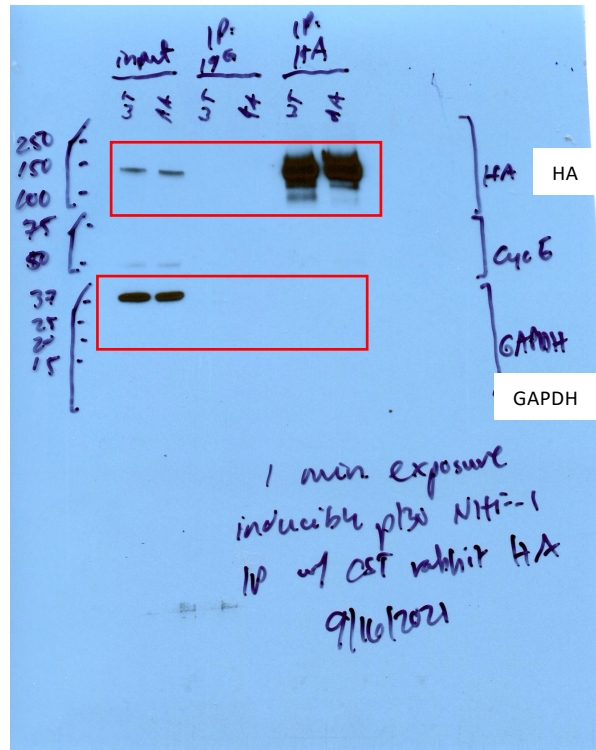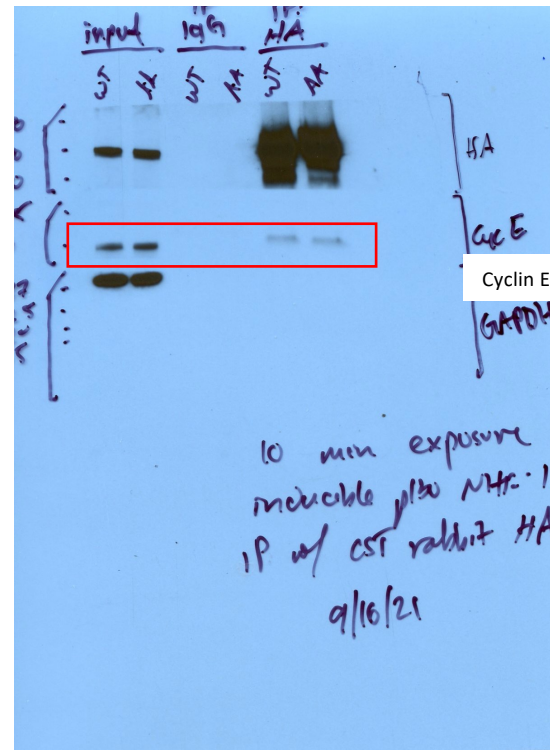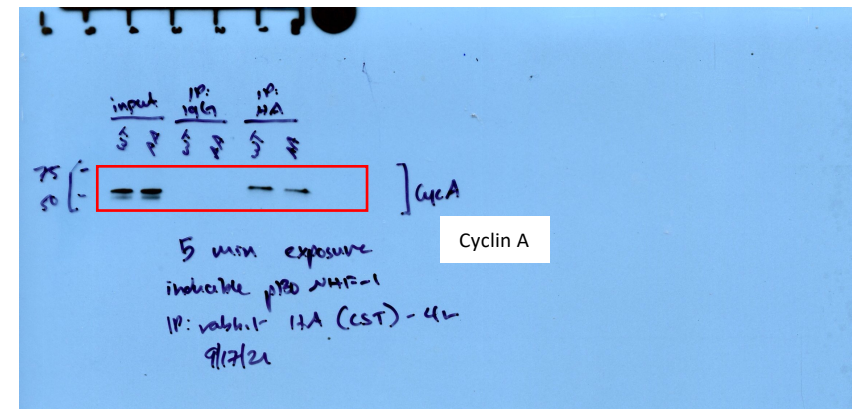

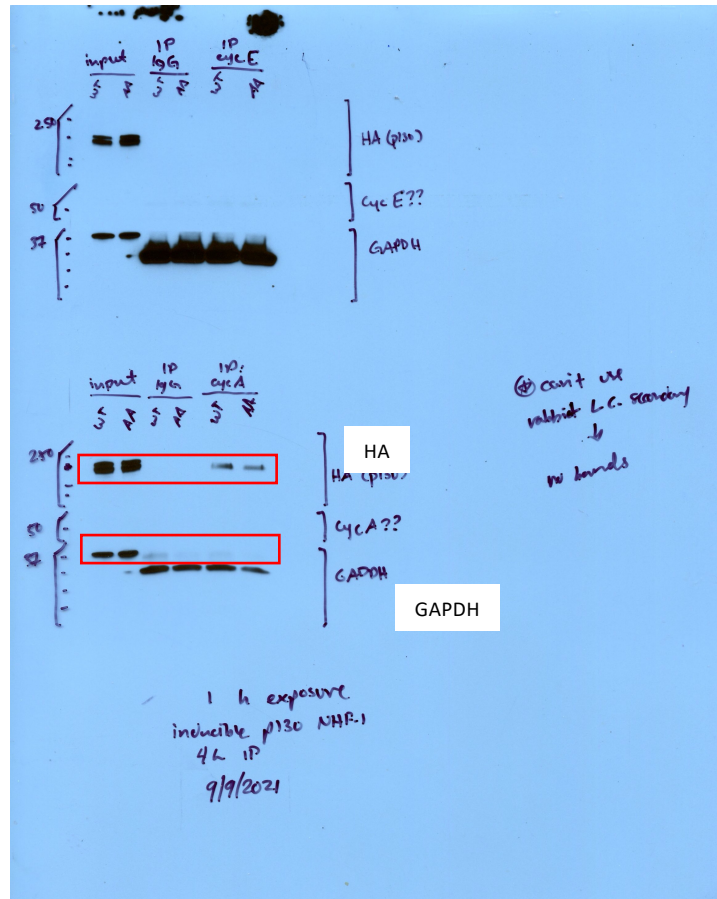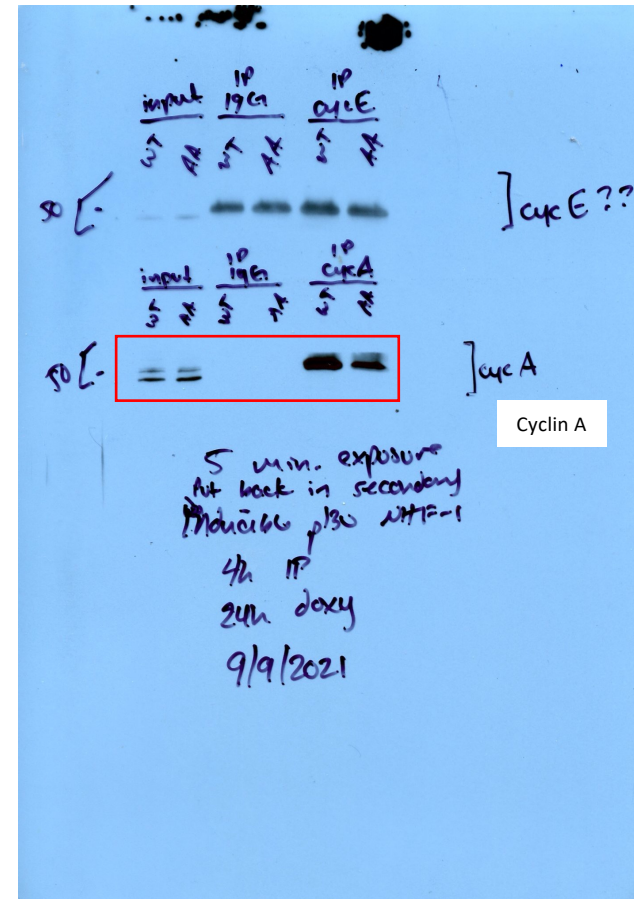

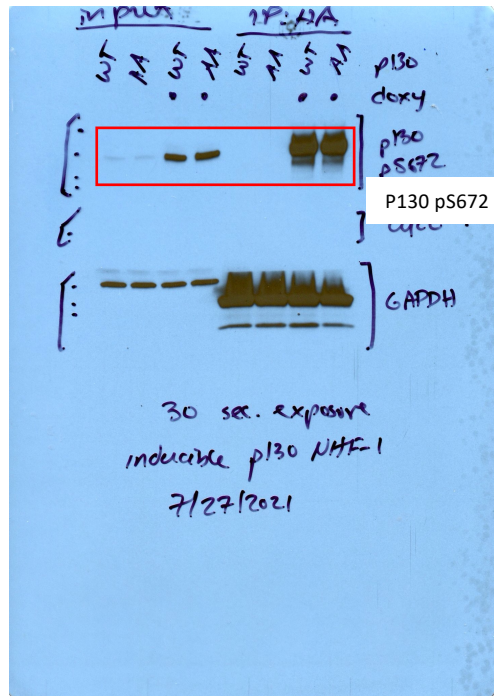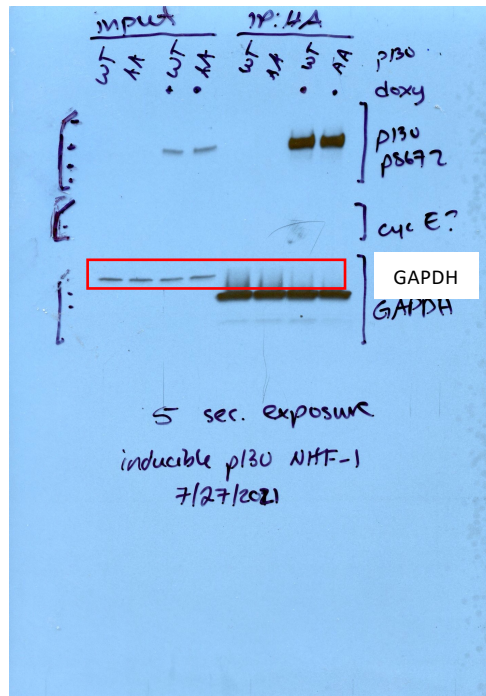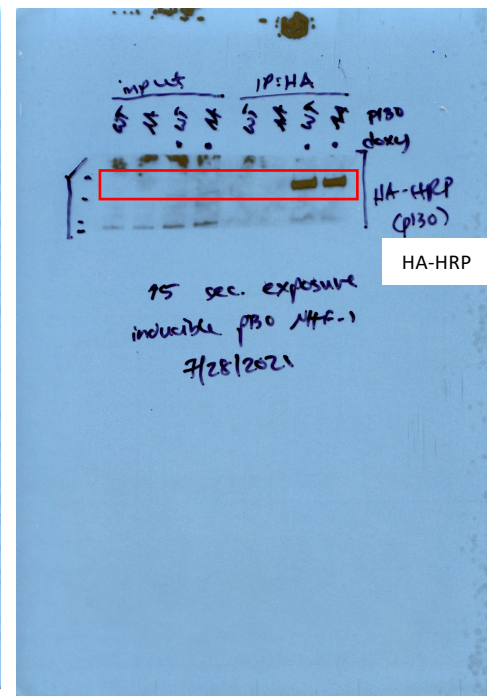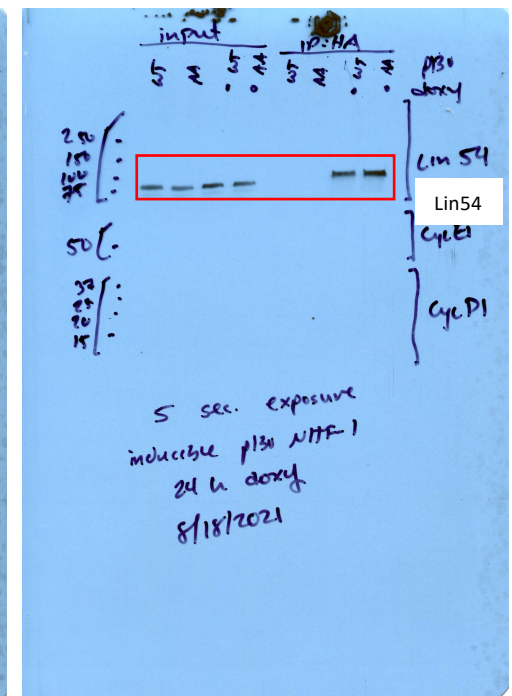

\*blotted membrane from 7/28 on  
8/18 once Lin54 antibody arrived



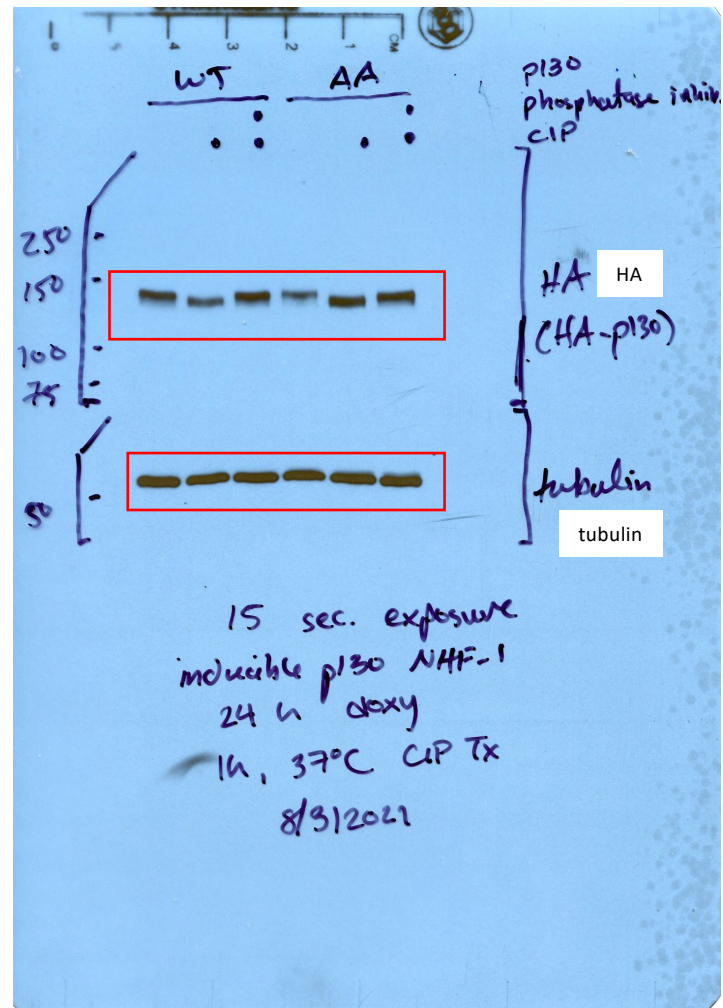

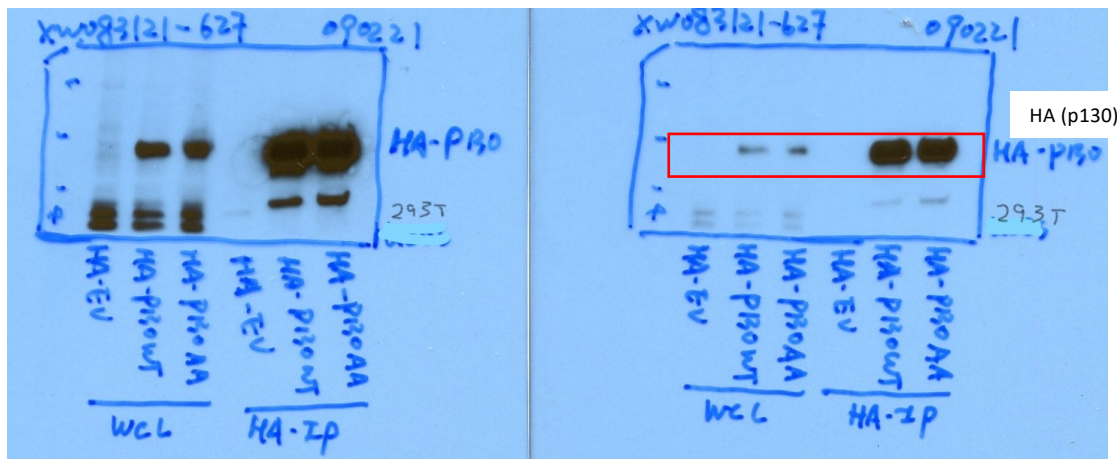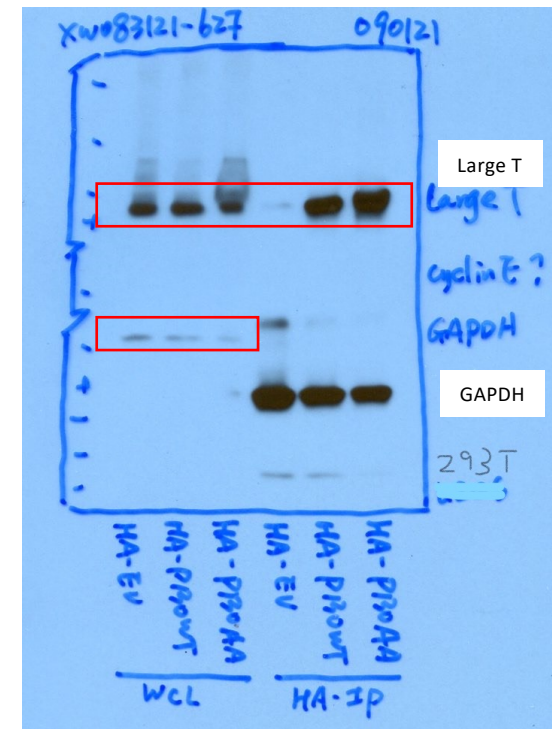

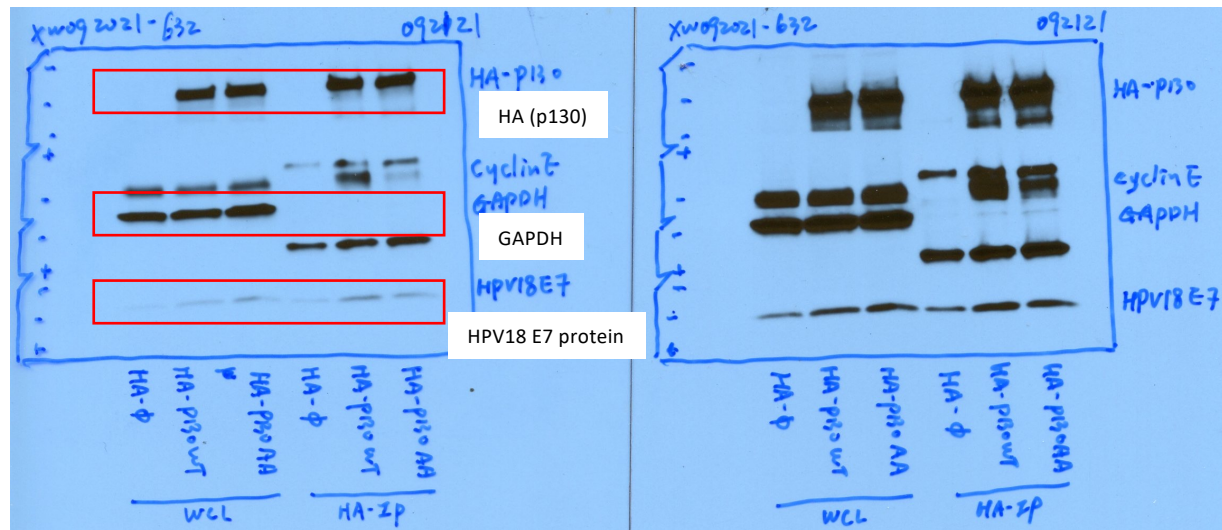

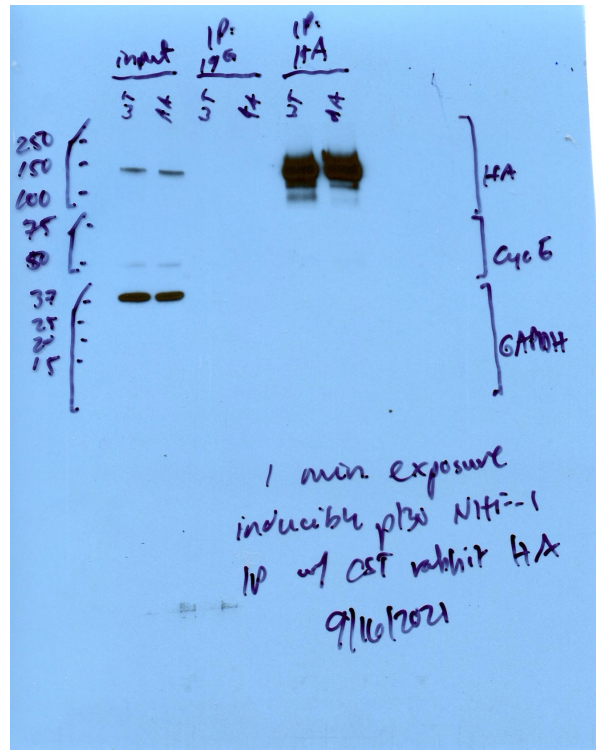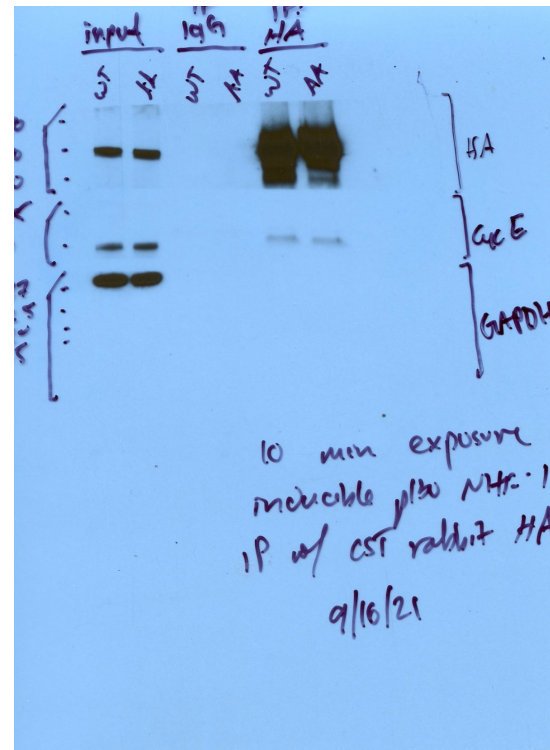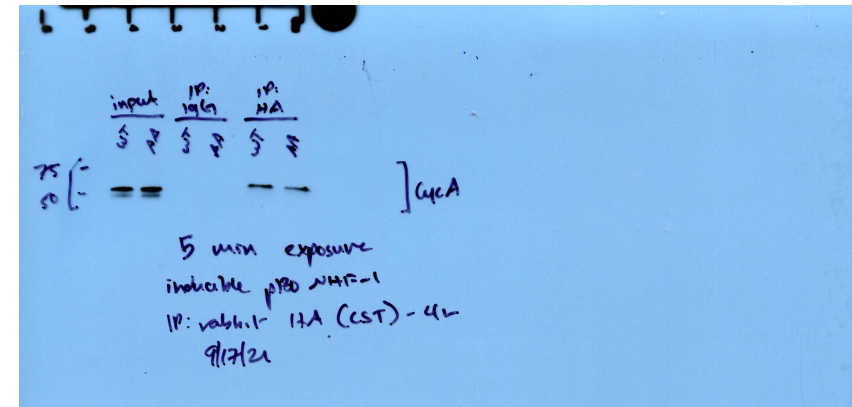



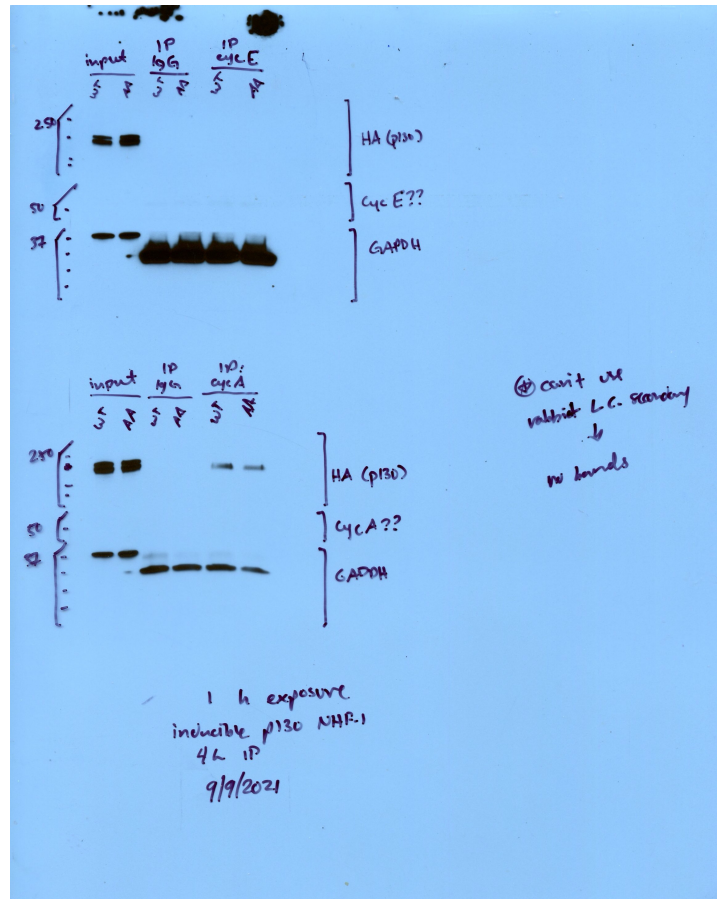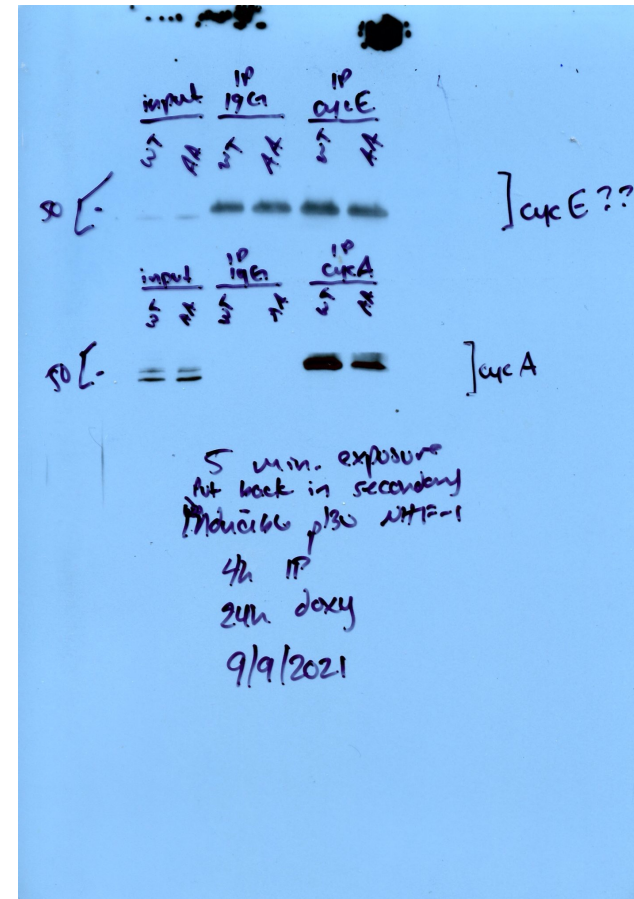



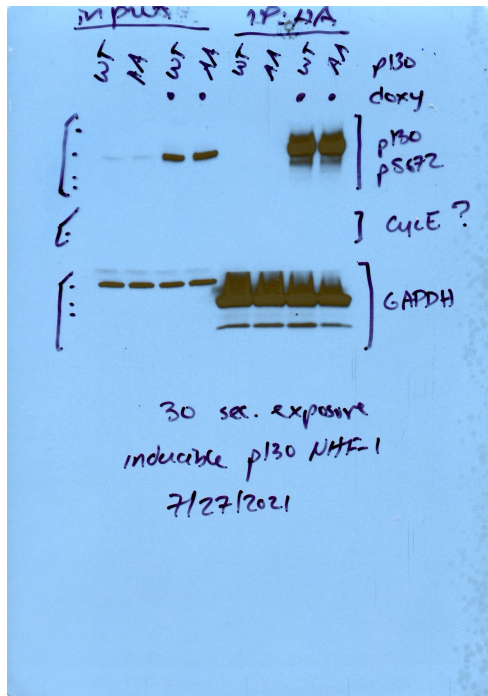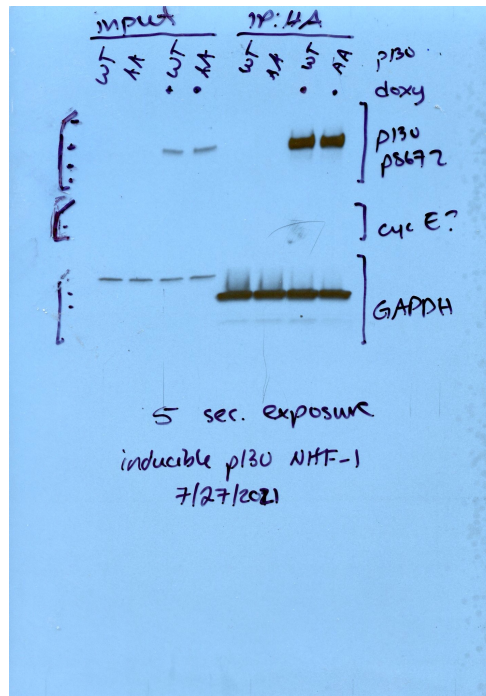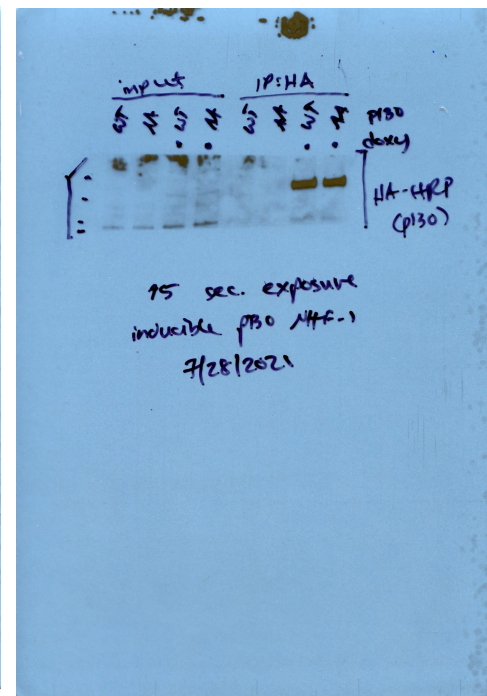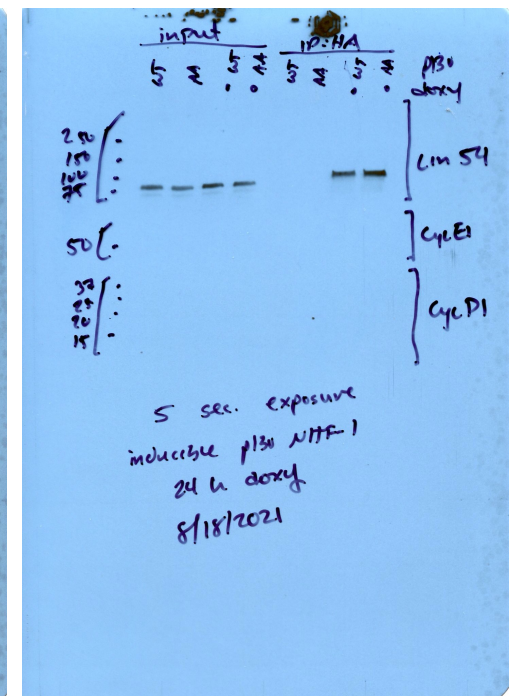

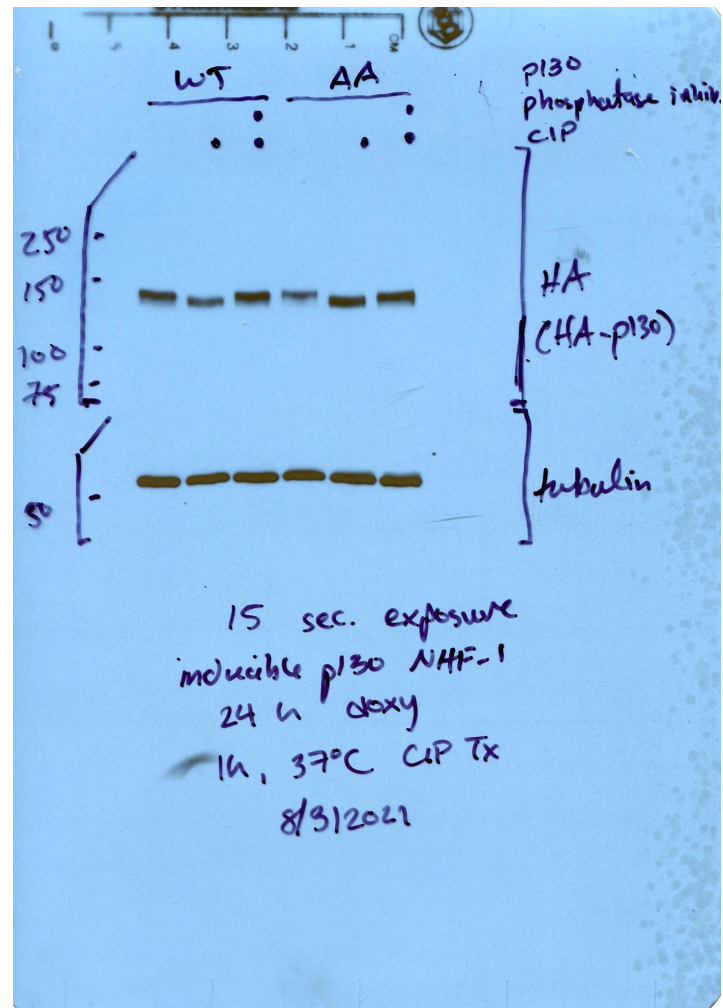

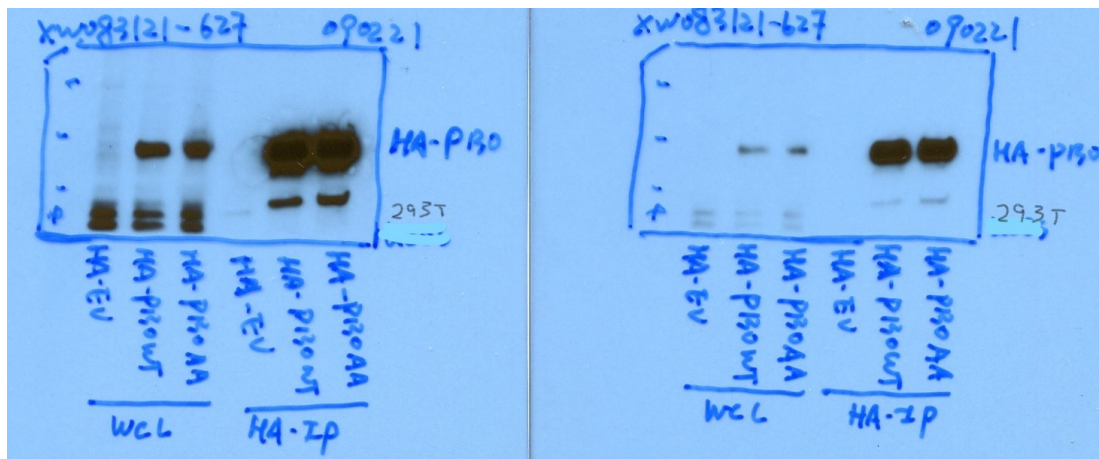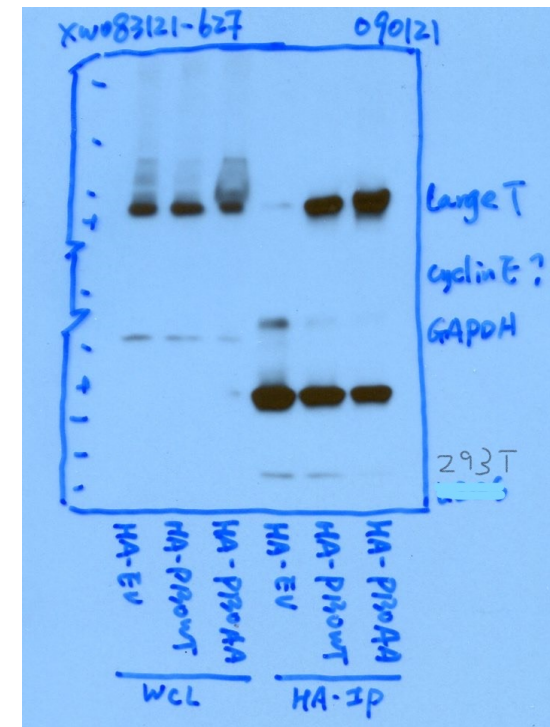



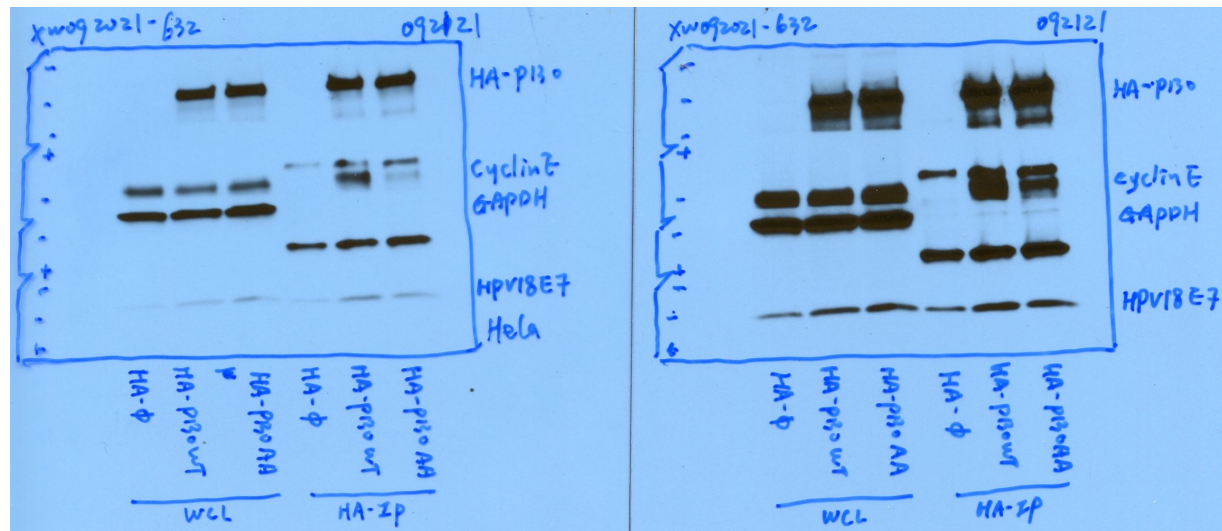

Supplement: supp2 [file elife-70691-supp2-v2.zip]

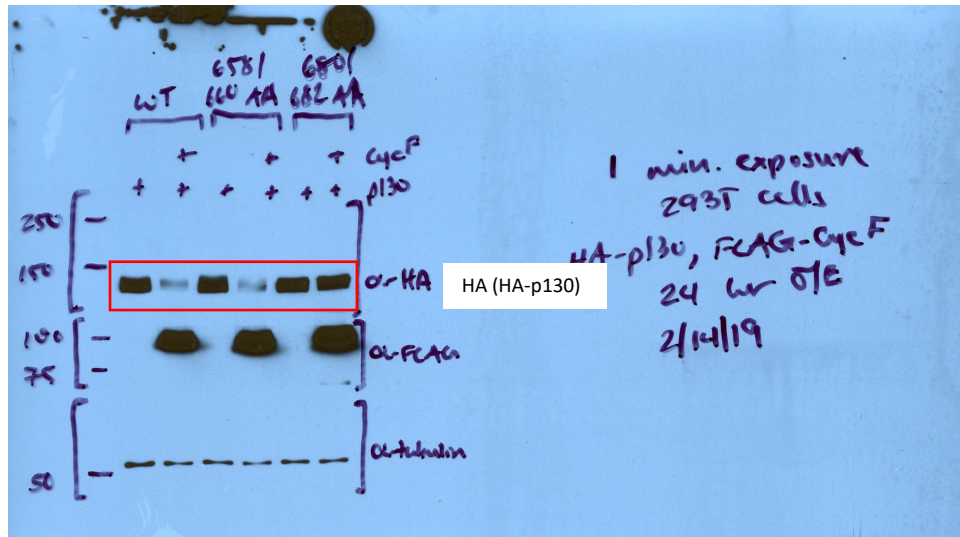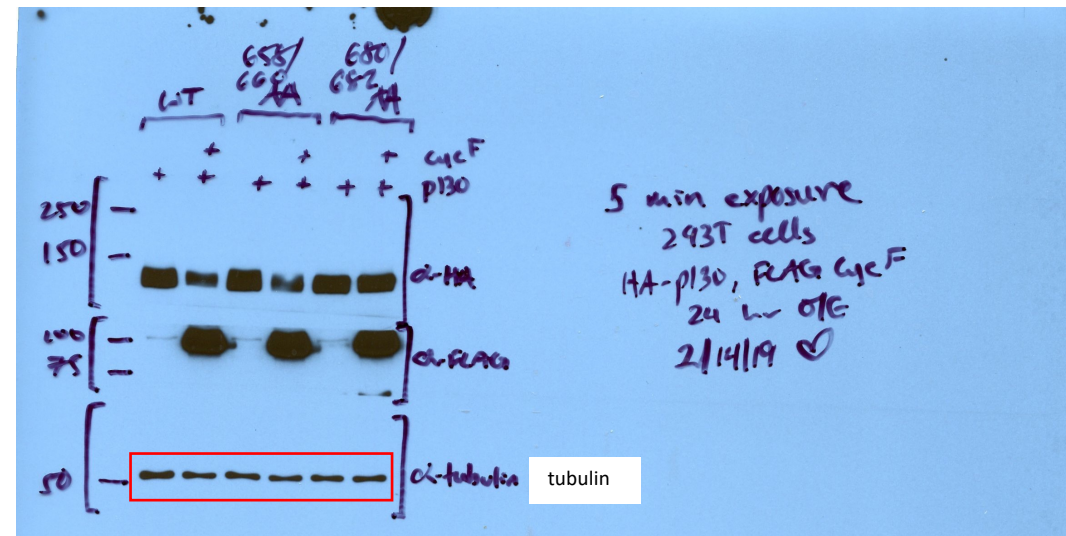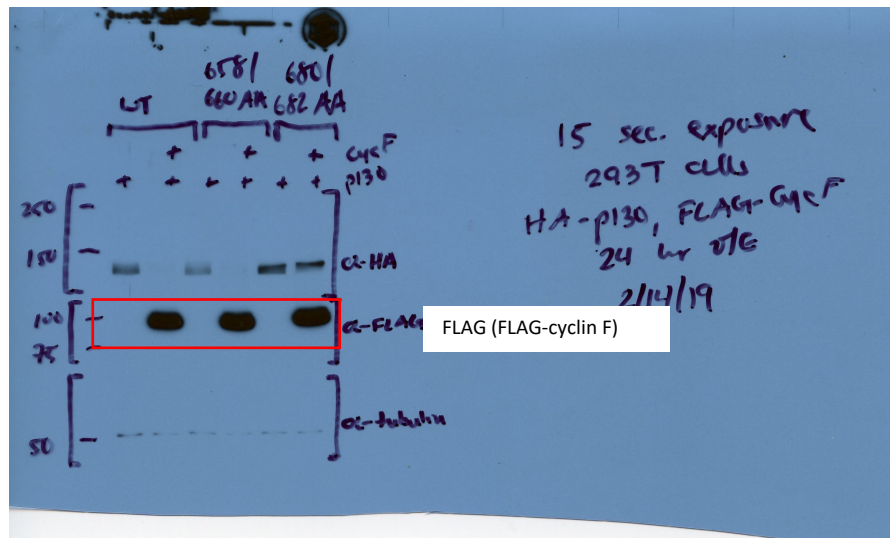

Left side:

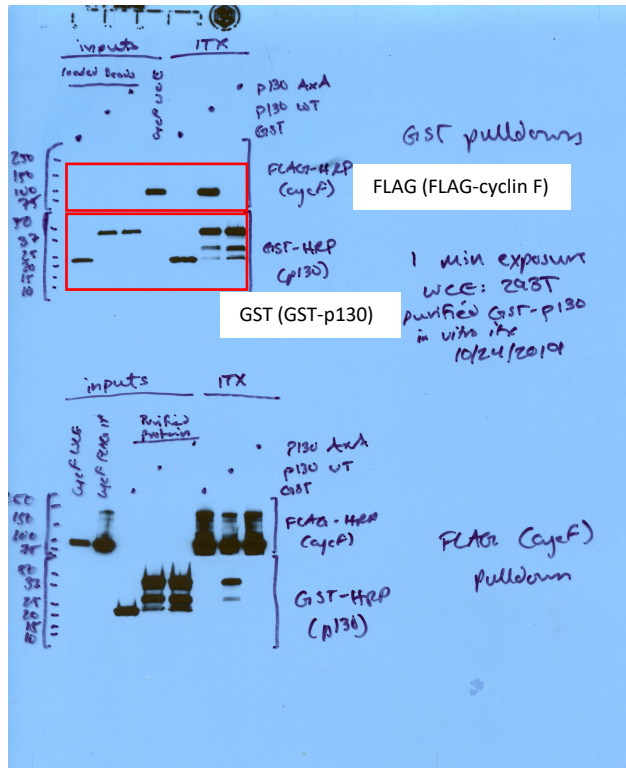

Right side:

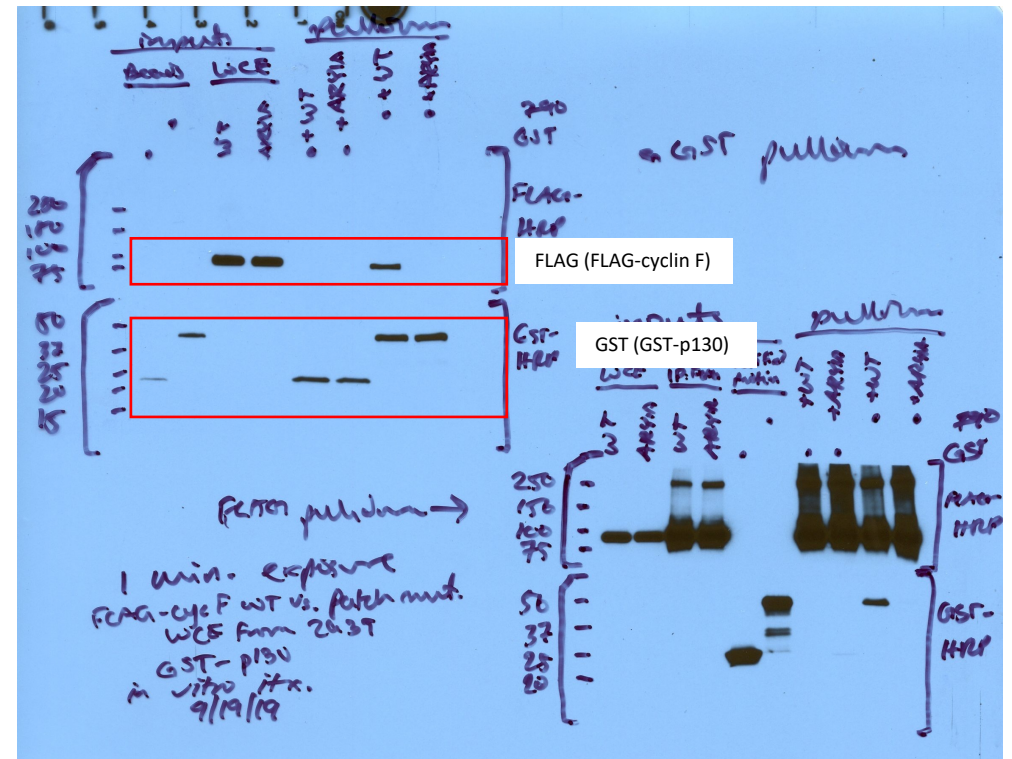



Right side:

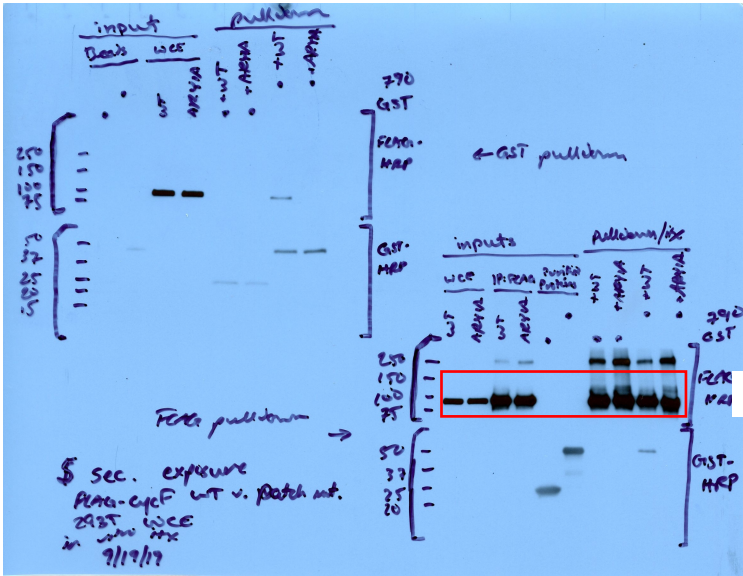

FLAG (FLAG-cyclin F)

Left side:

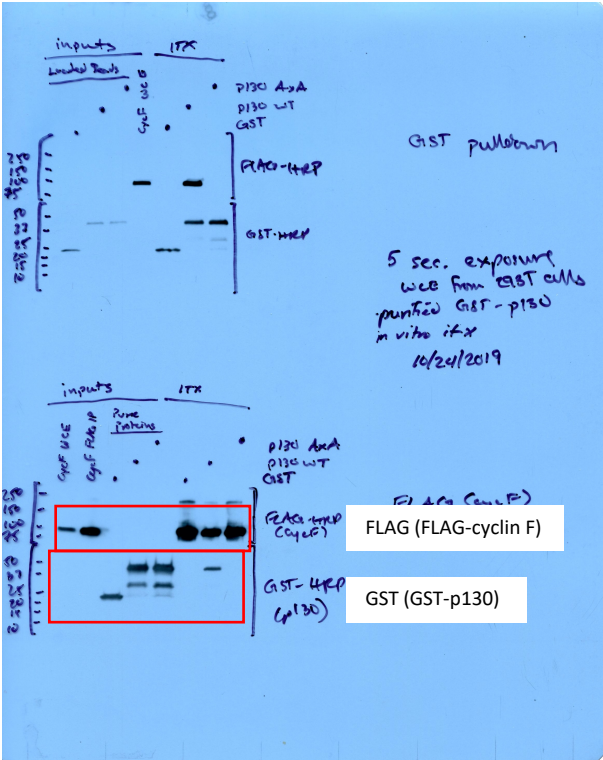

FLAG (FLAG-cyclin F)

GST (GST-p130)

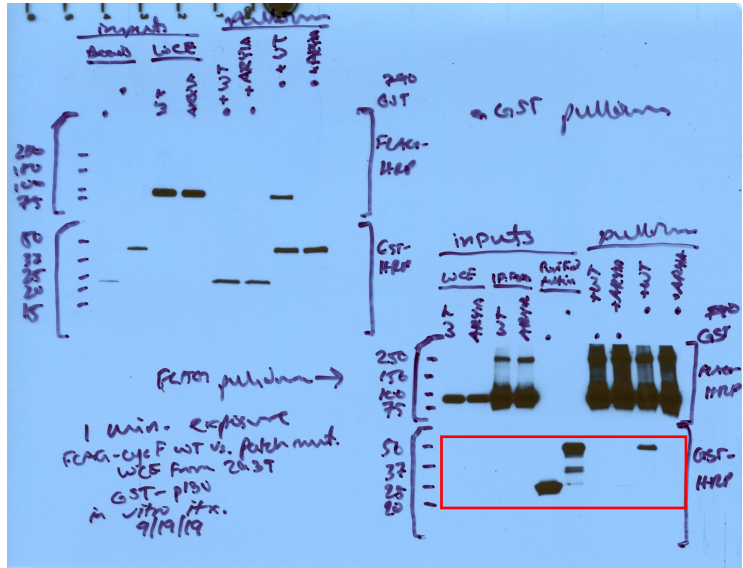

GST (GST-p130)

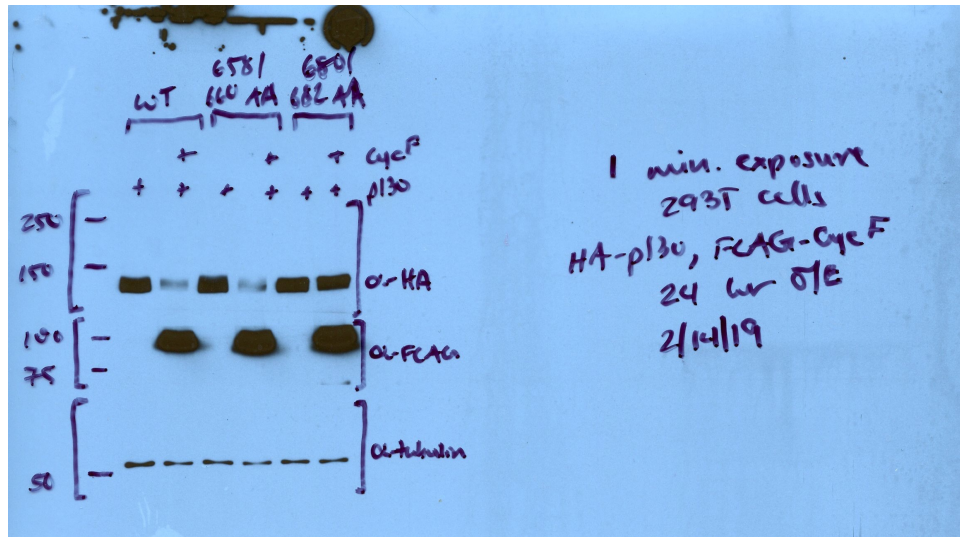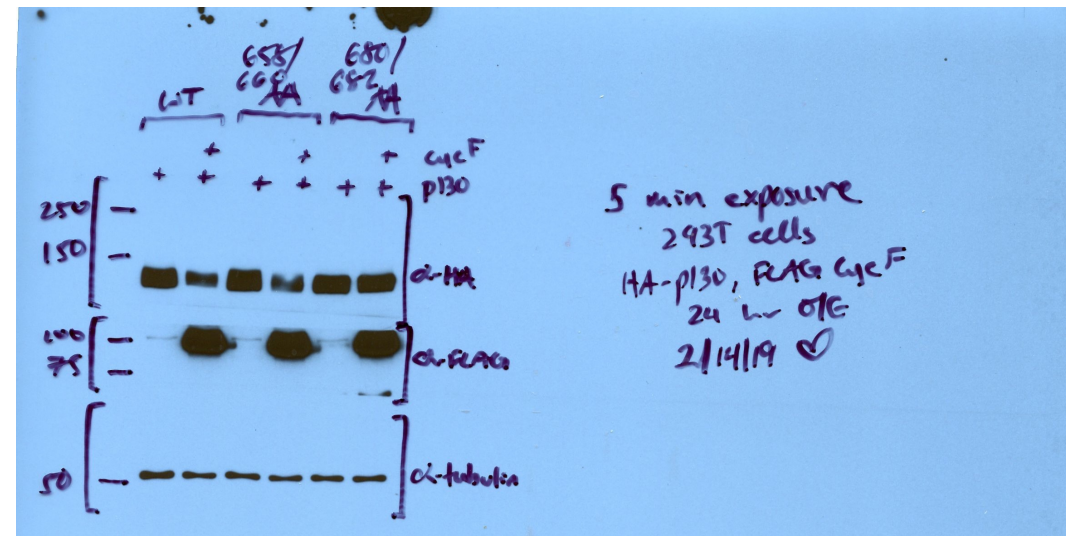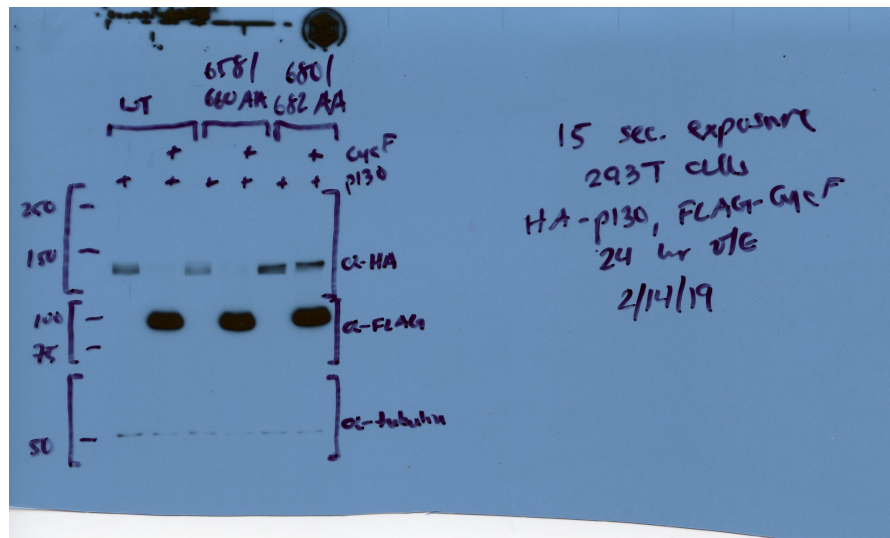



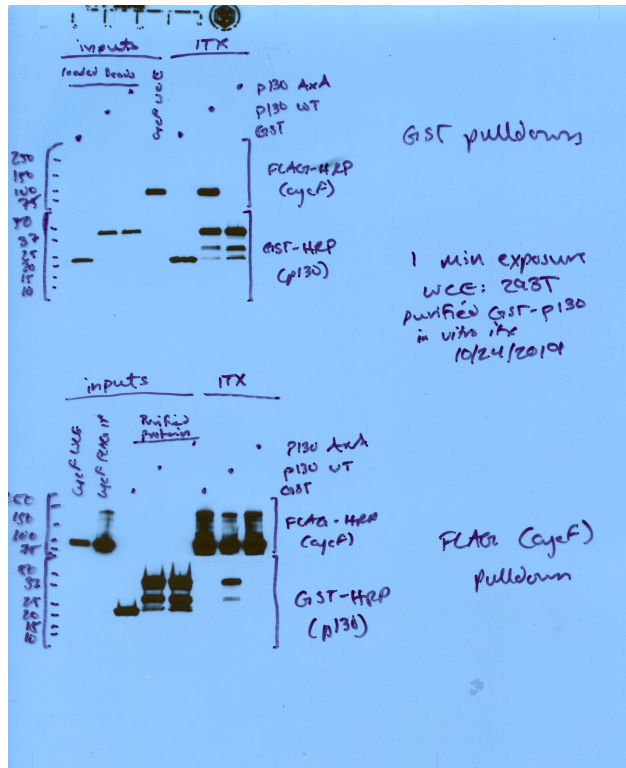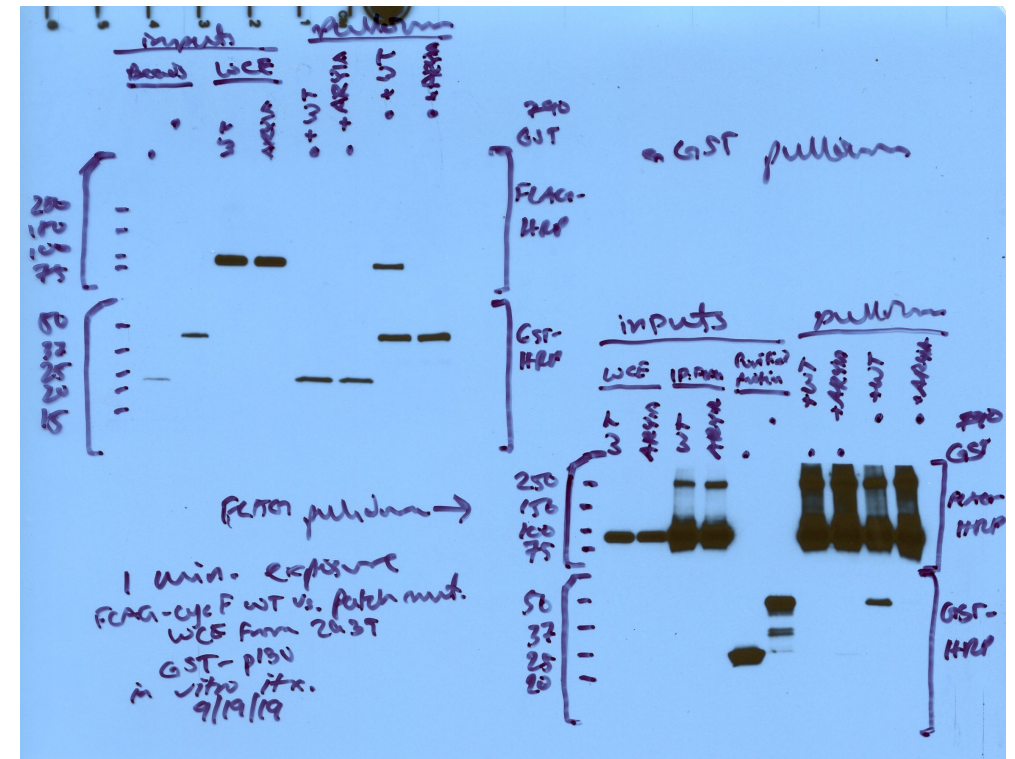

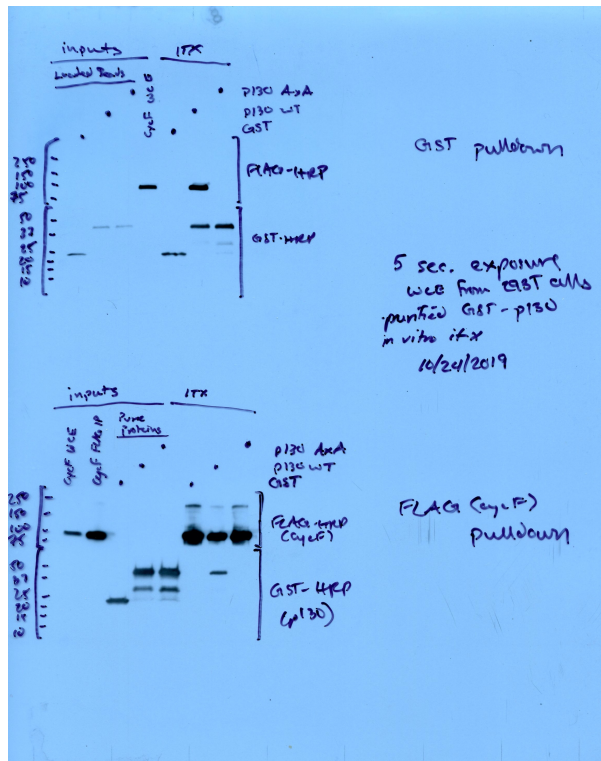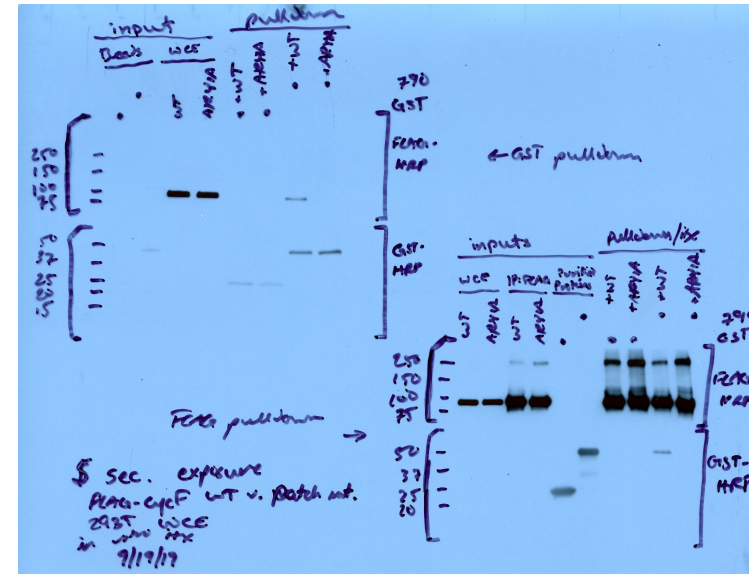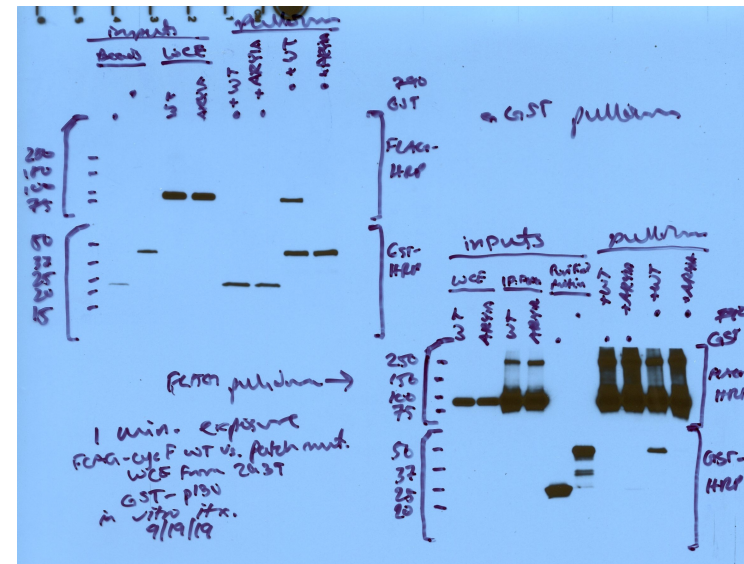

Supplement: supp2 [file elife-70691-supp2-v2.zip]

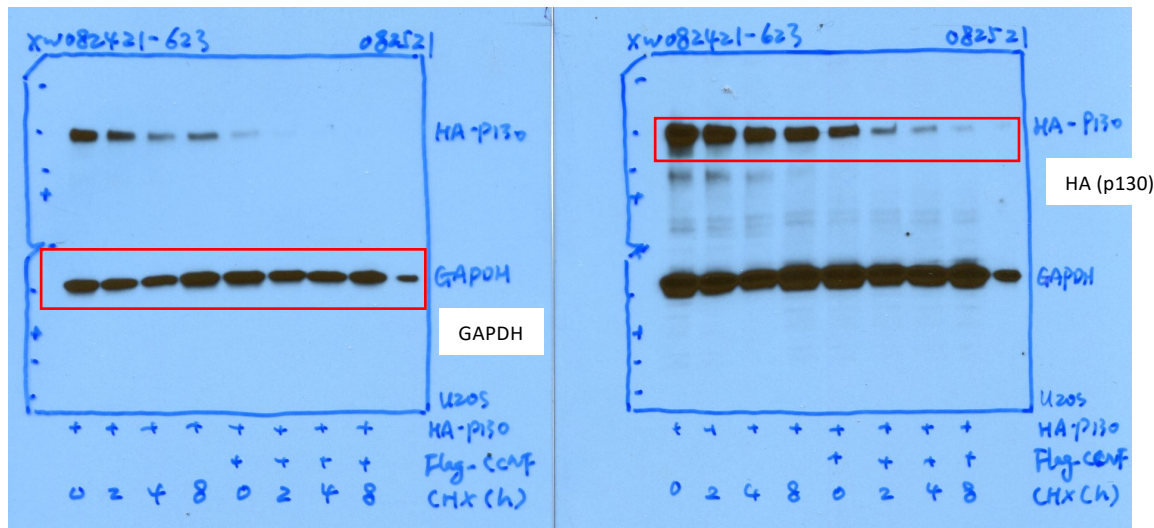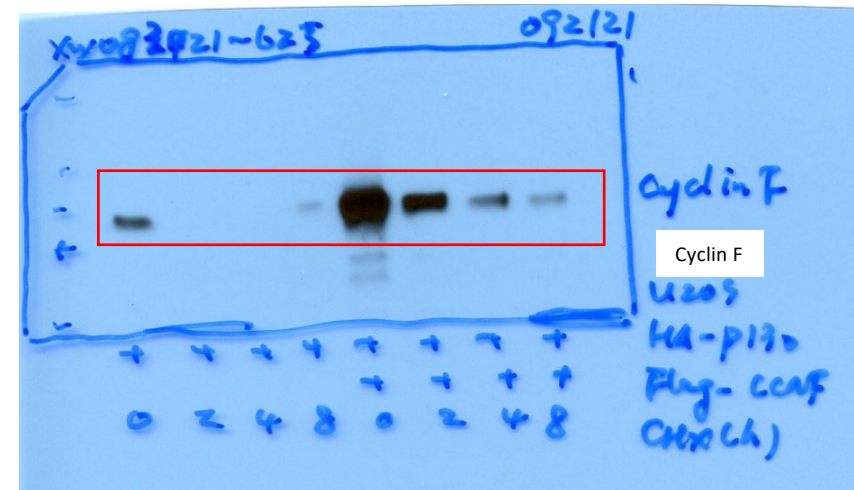

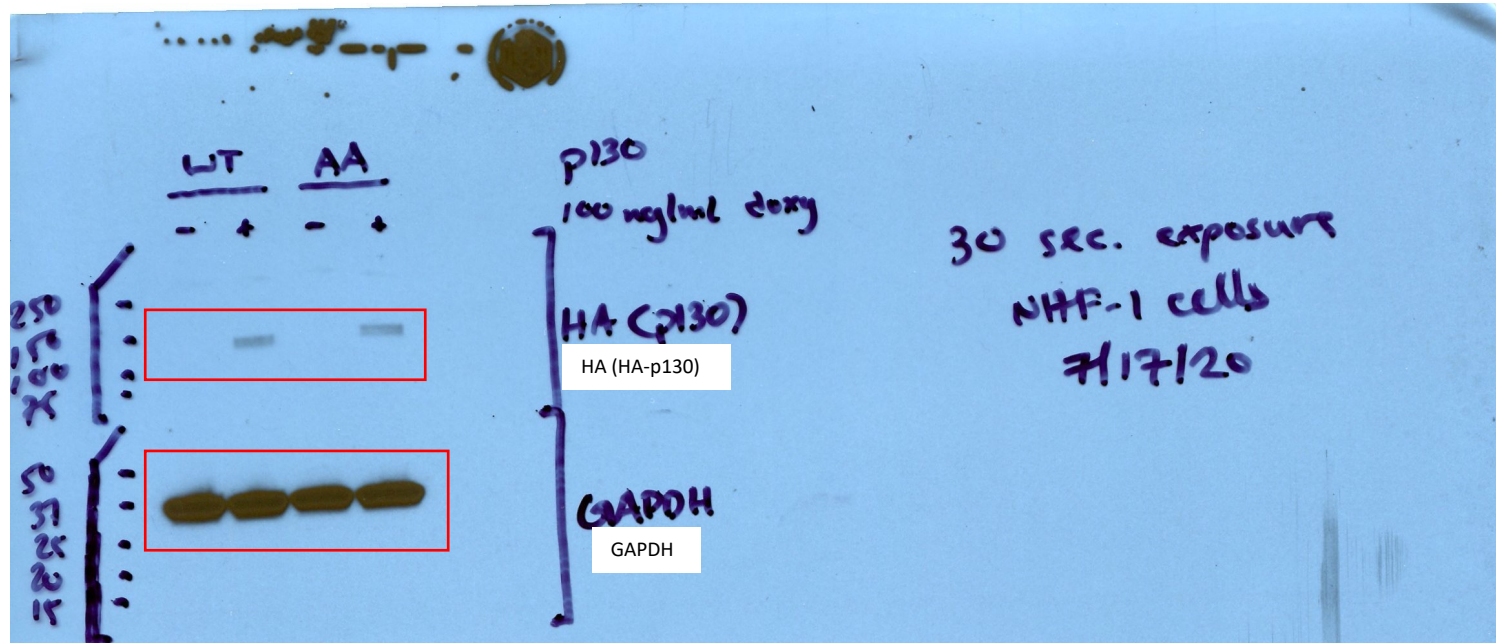

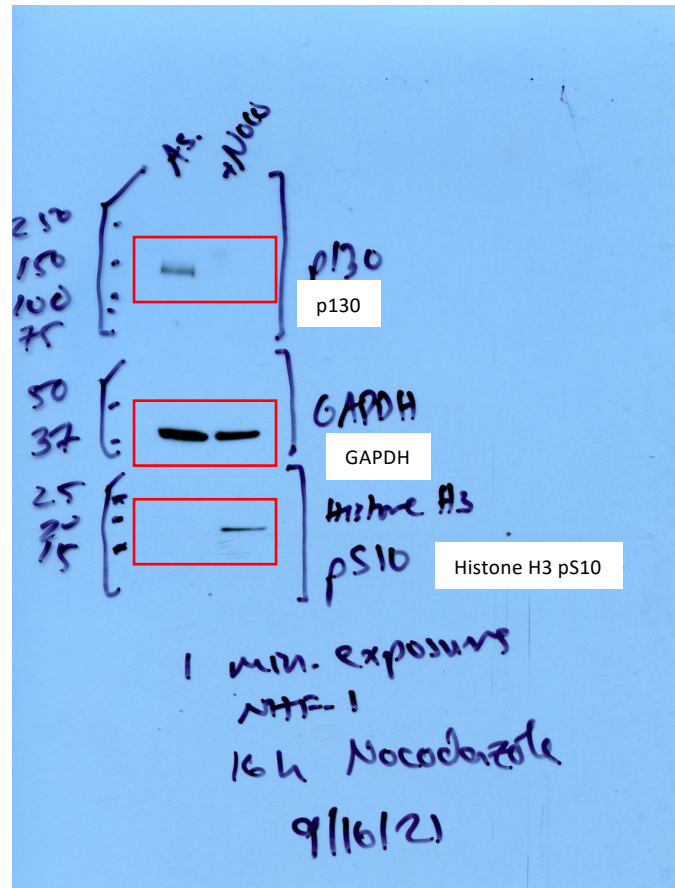

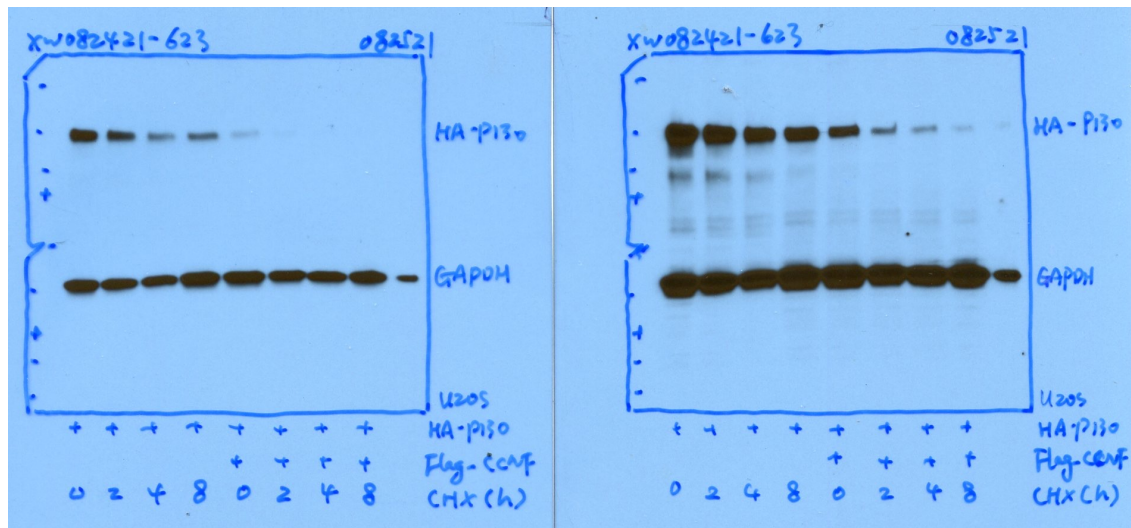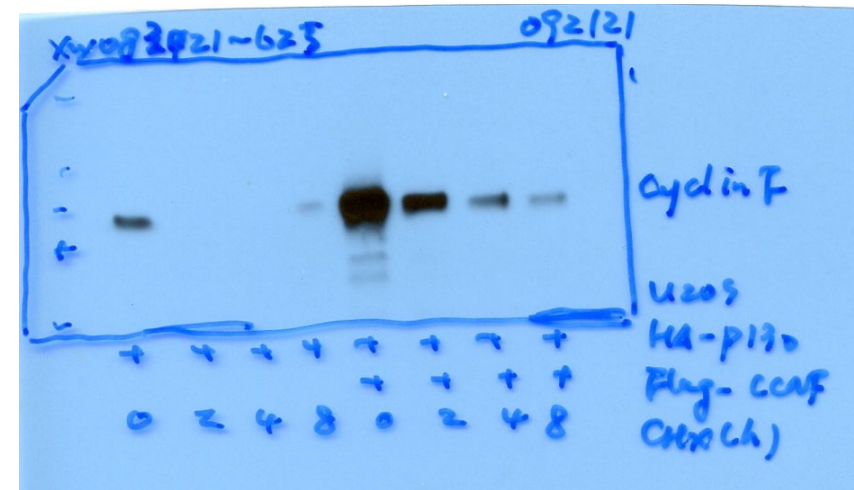



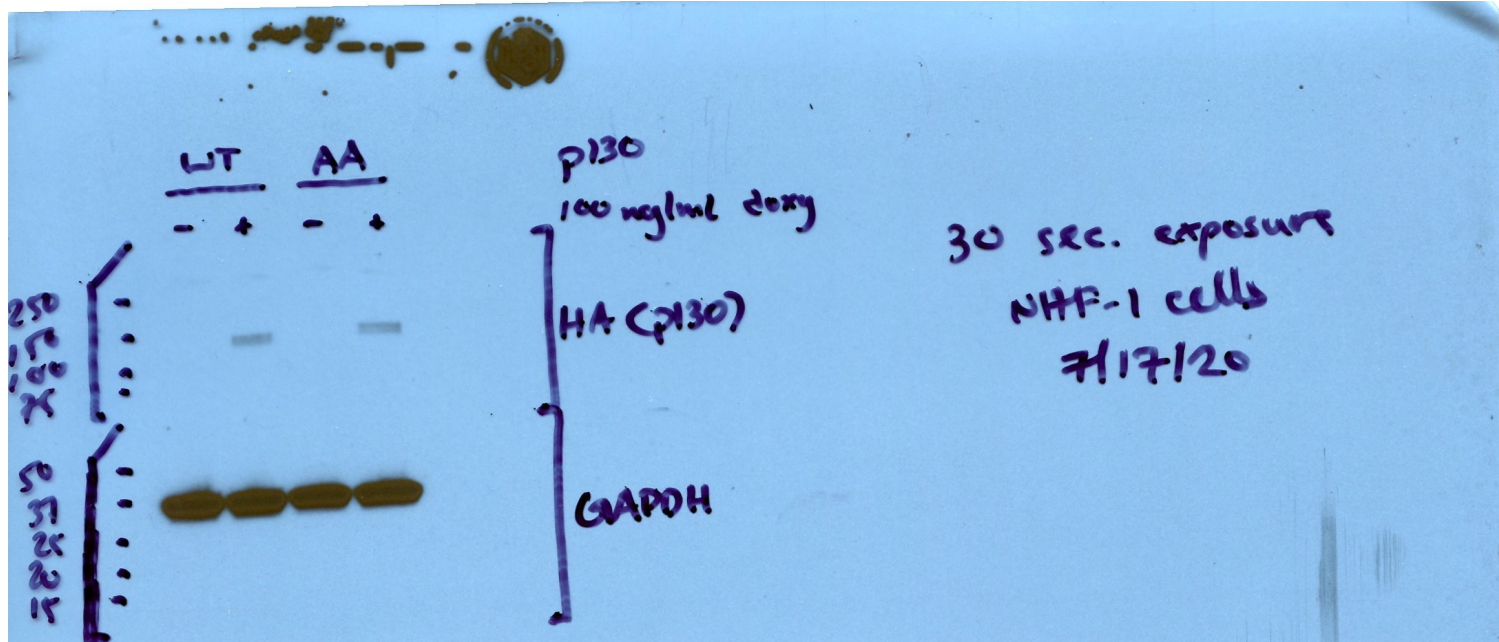

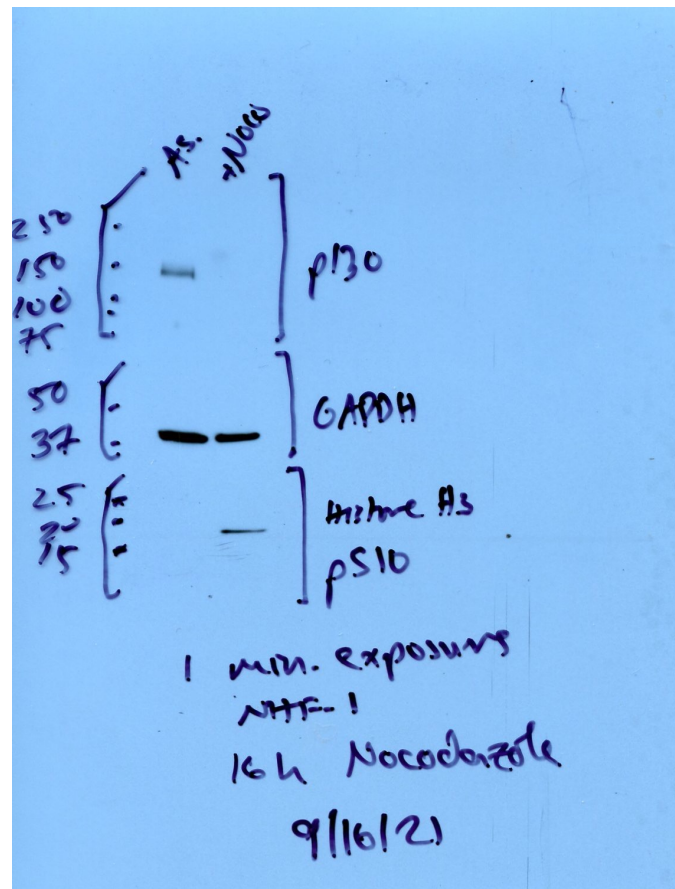

Supplement: supp2 [file elife-70691-supp2-v2.zip]

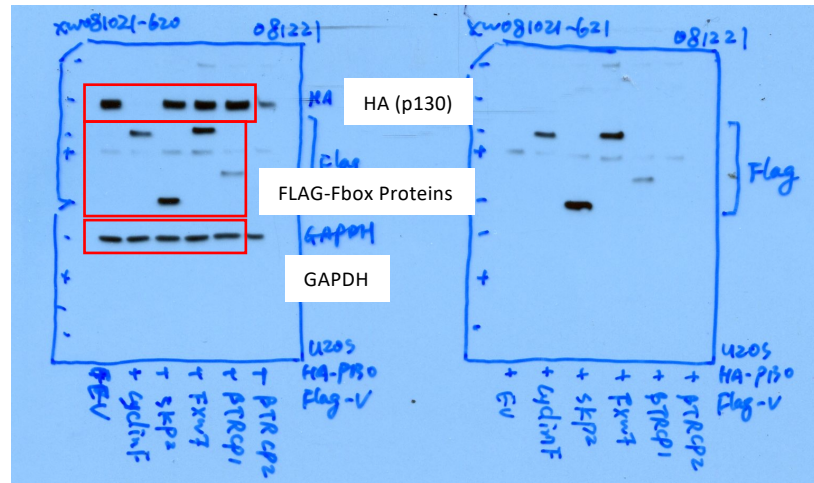

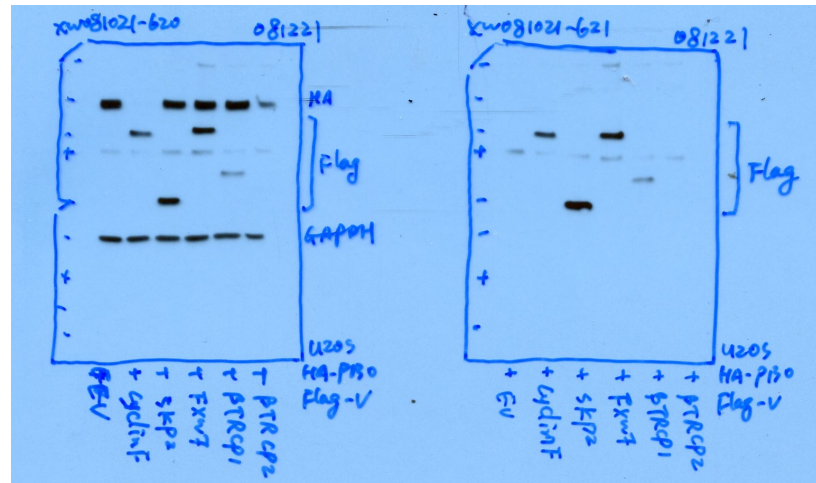

Supplement: supp2 [file elife-70691-supp2-v2.zip]

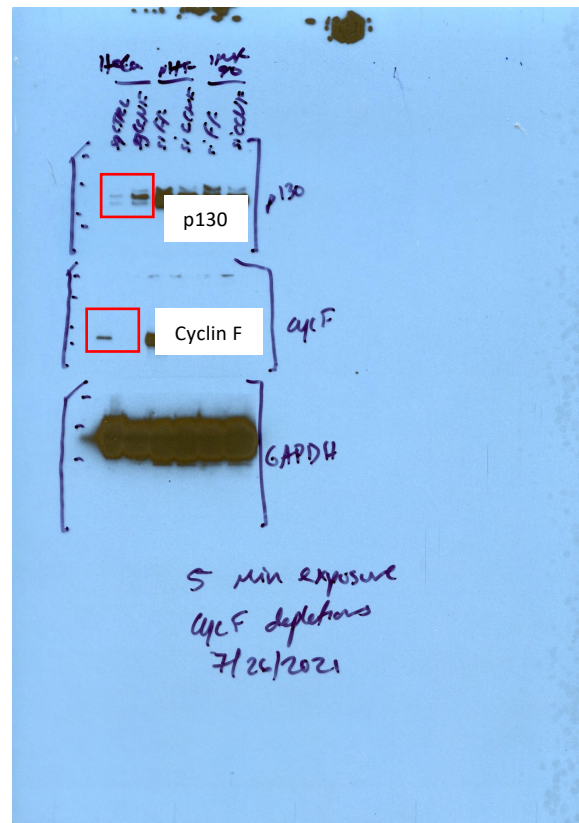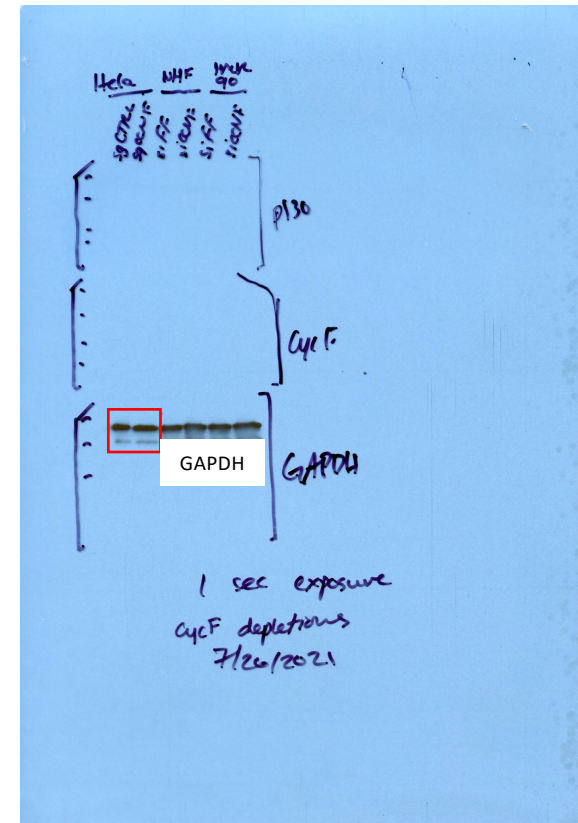

For the NHF-1 cells:

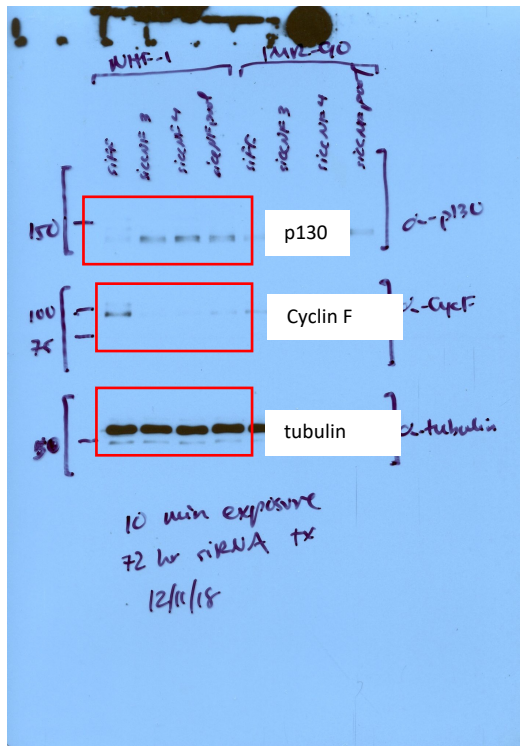

For the IMR-90 cells:

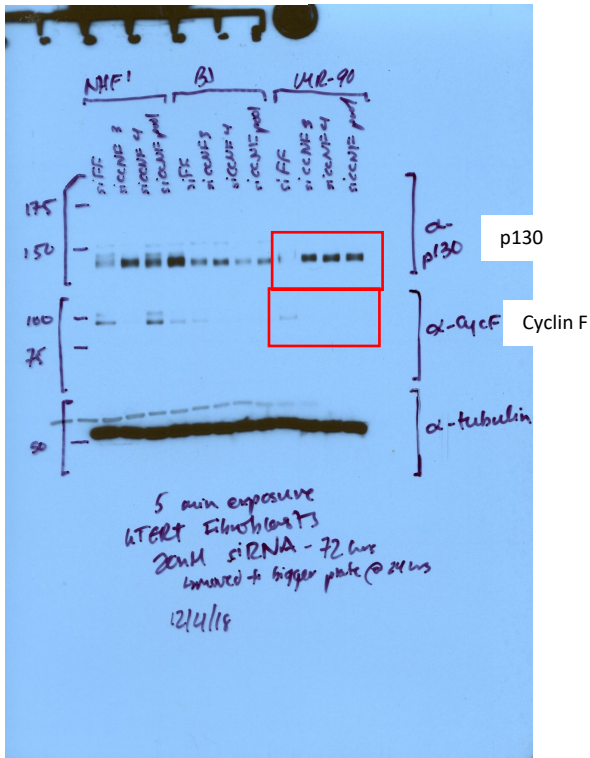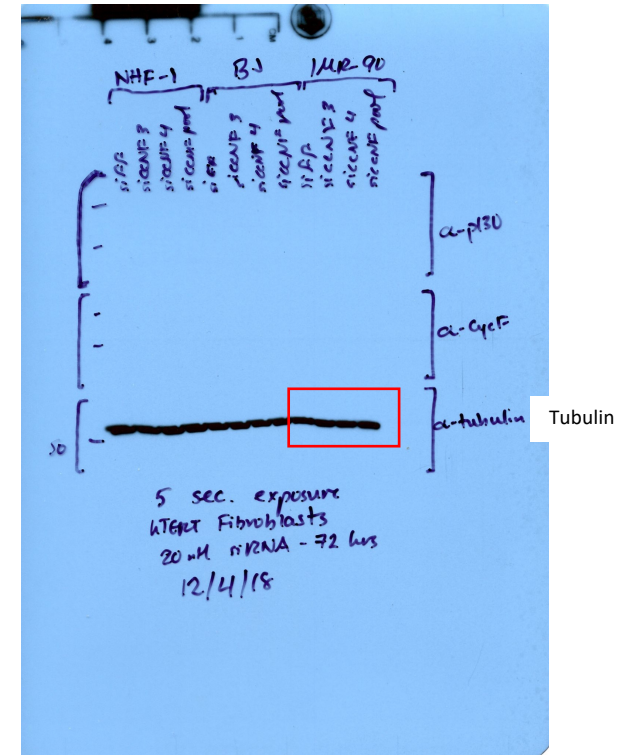

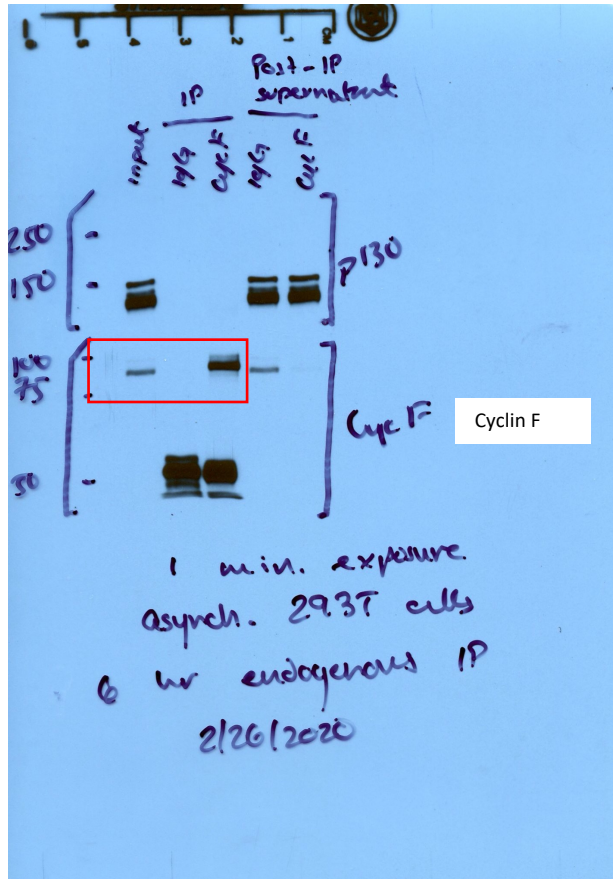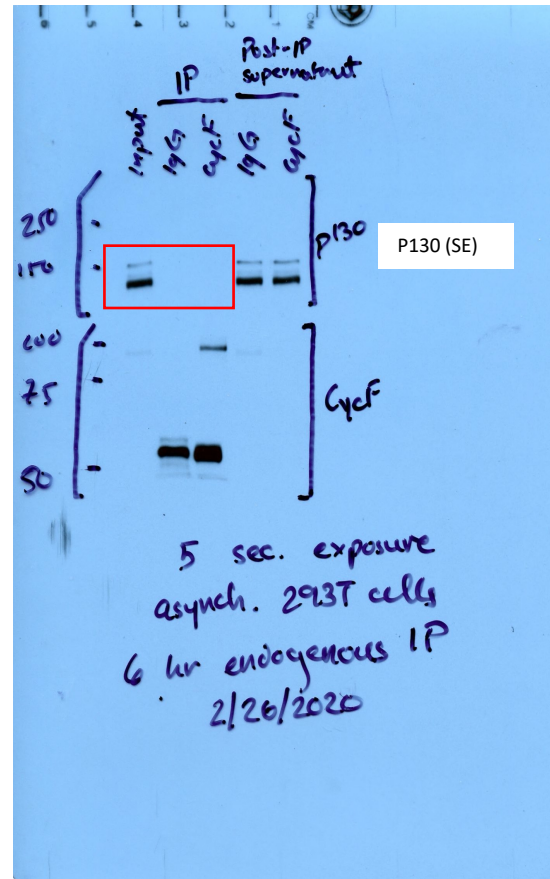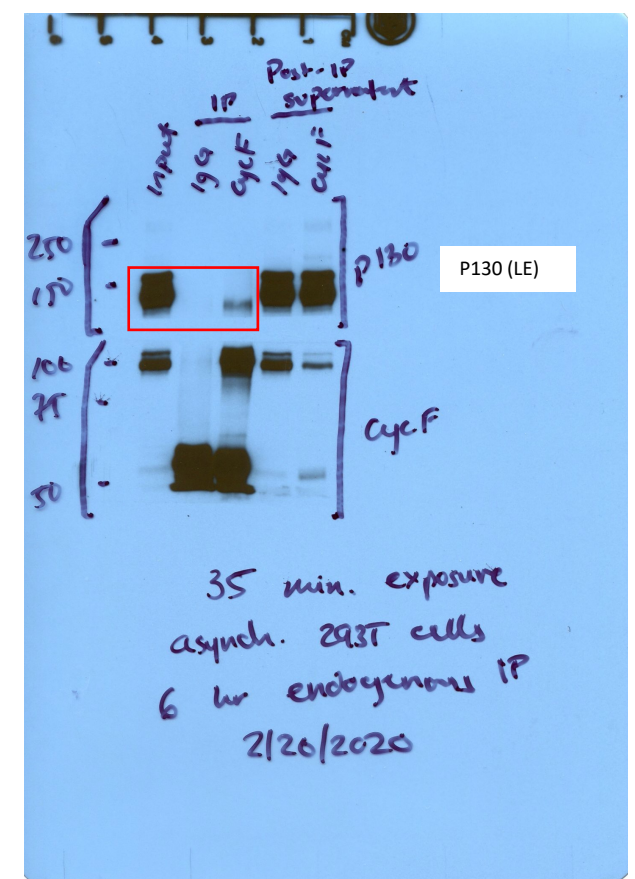



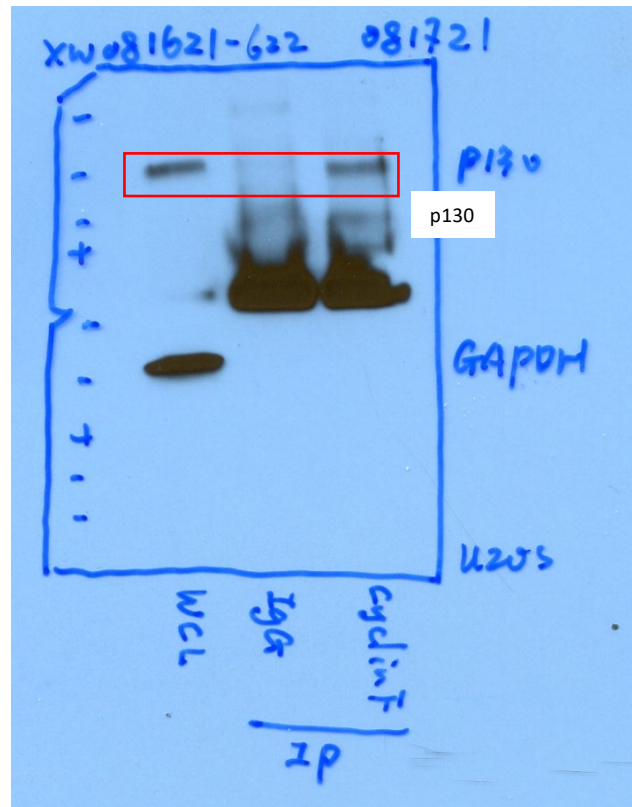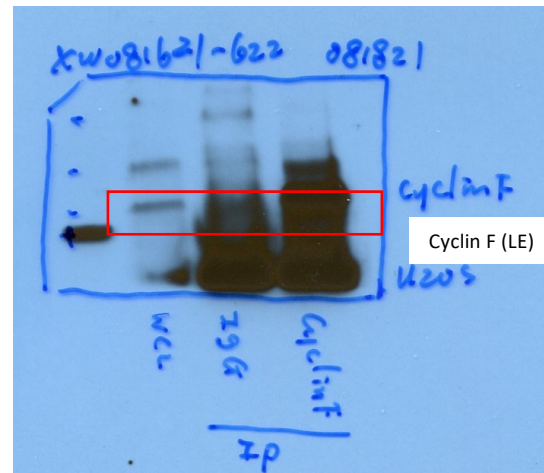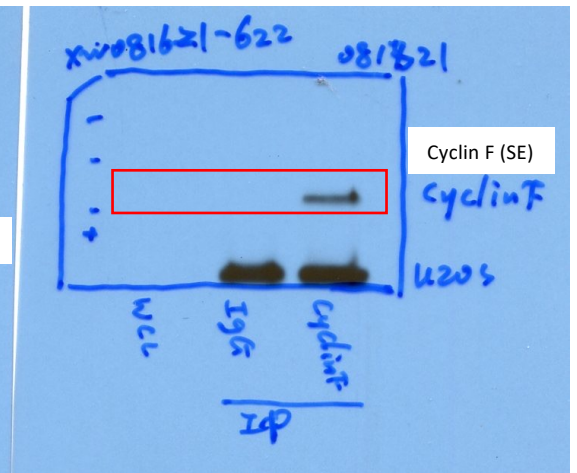

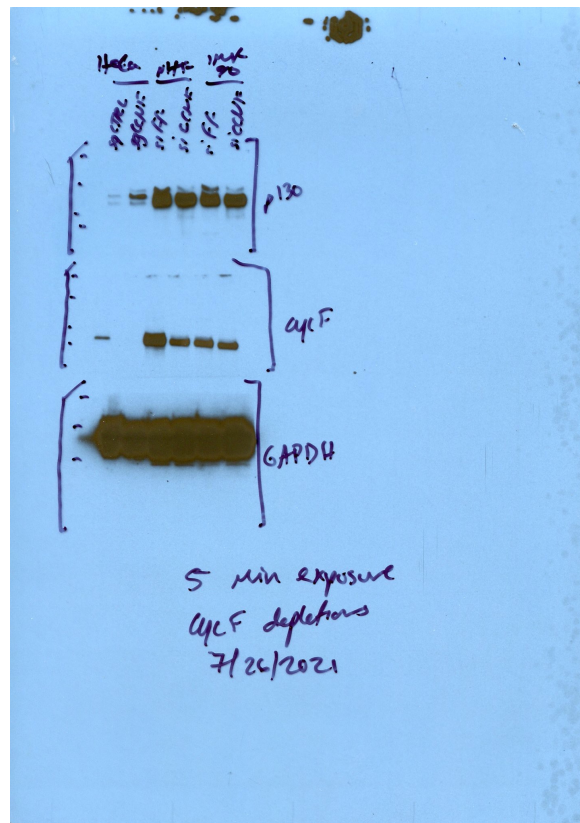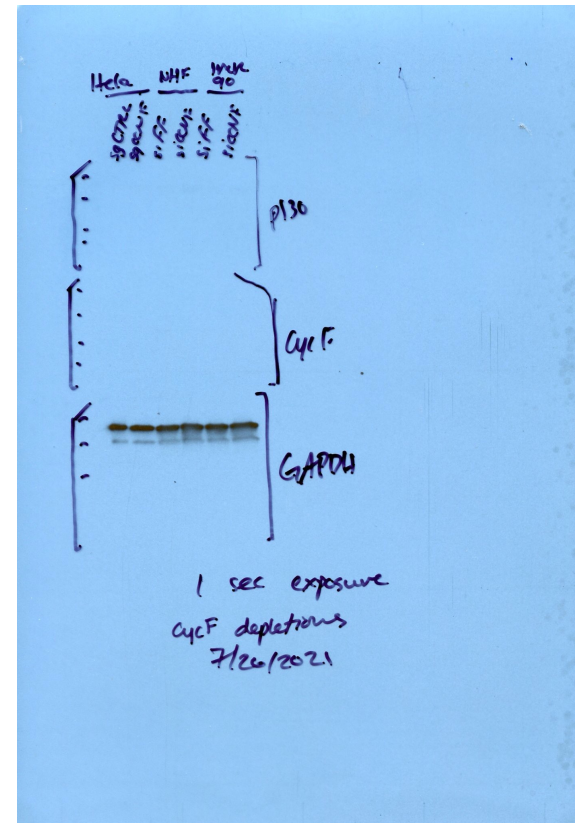

For the NHF-1 cells:

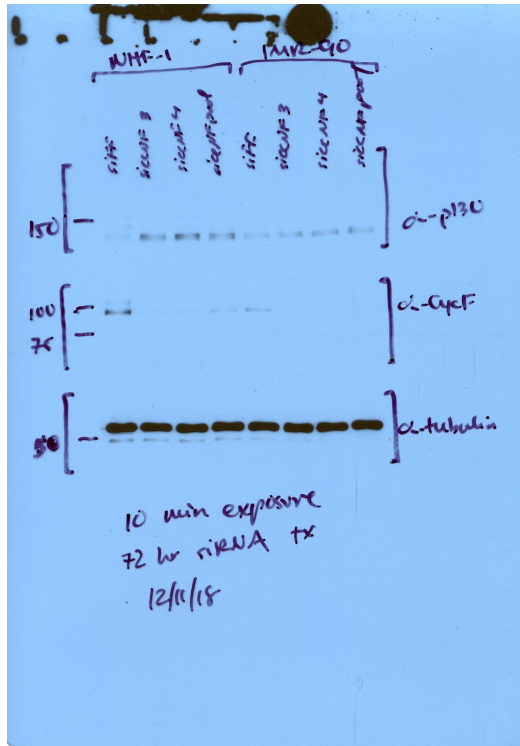

For the IMR-90 cells:

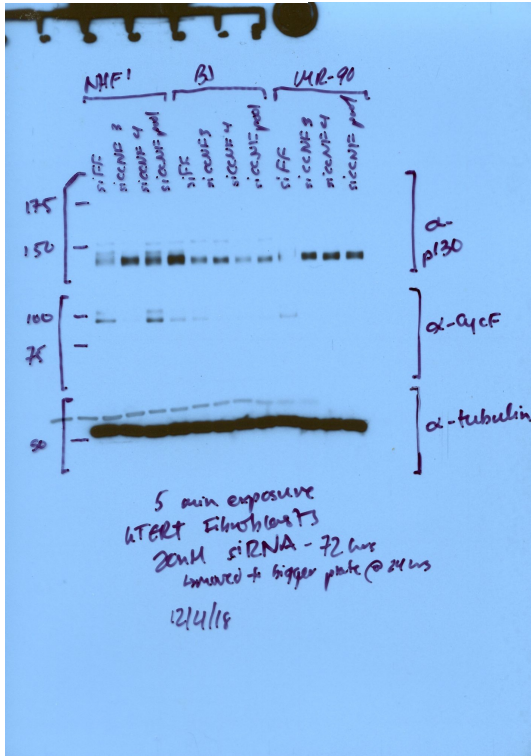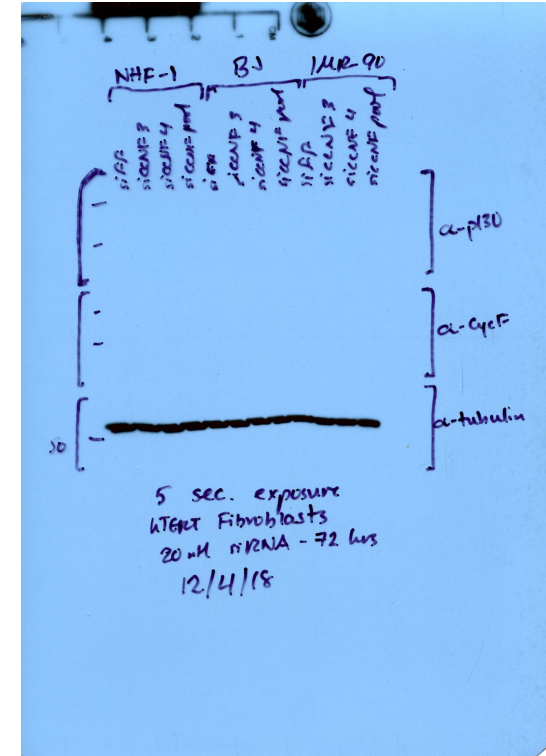



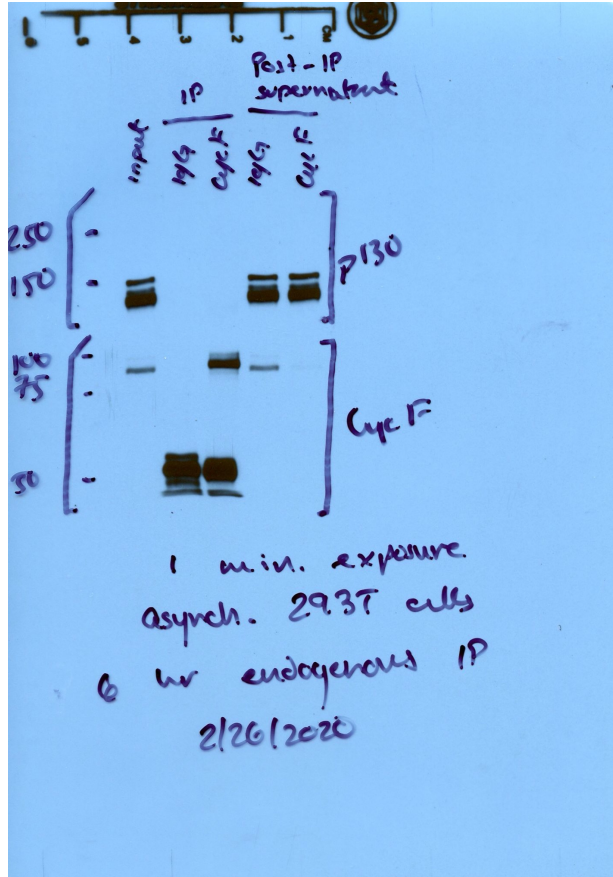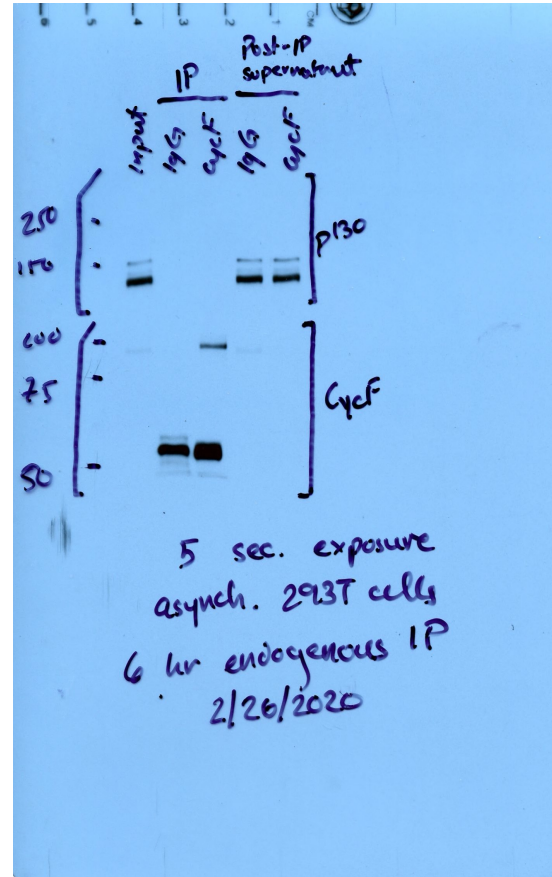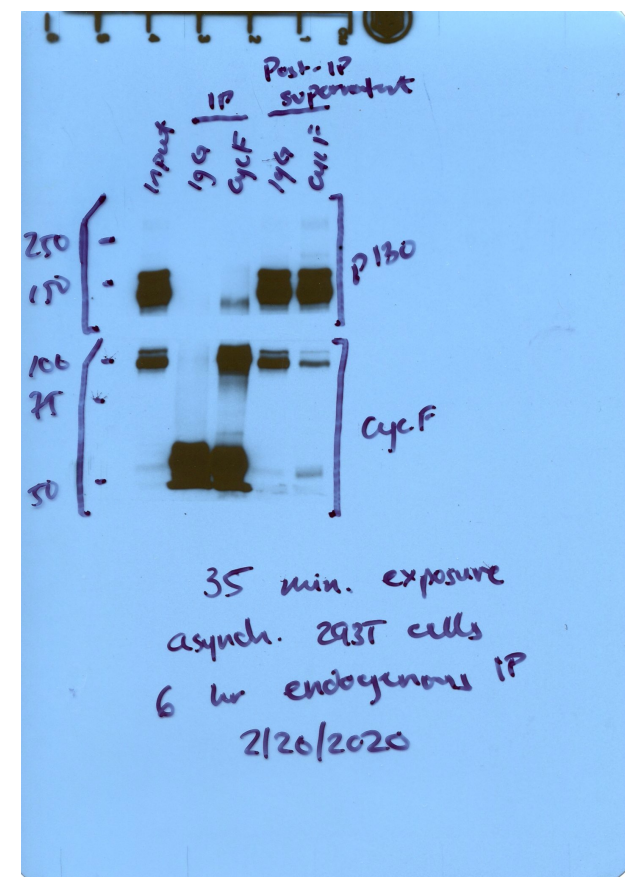

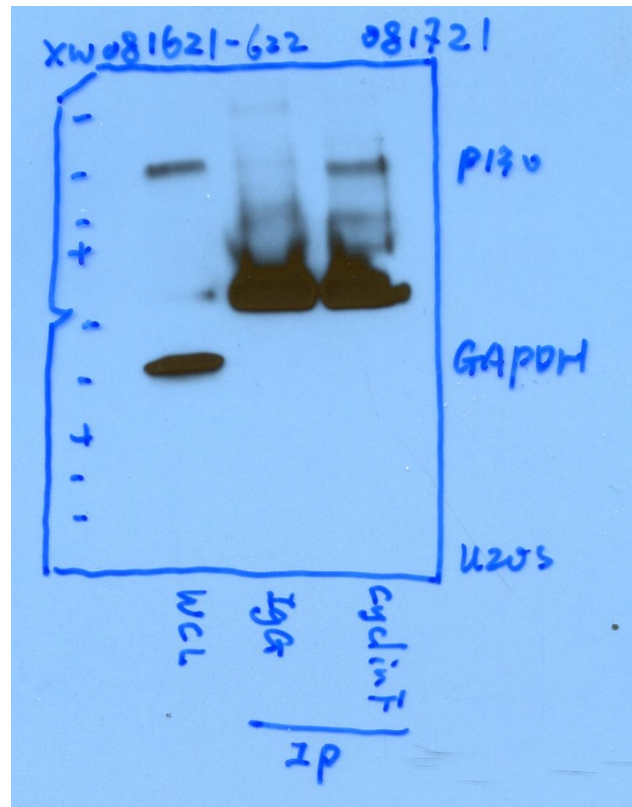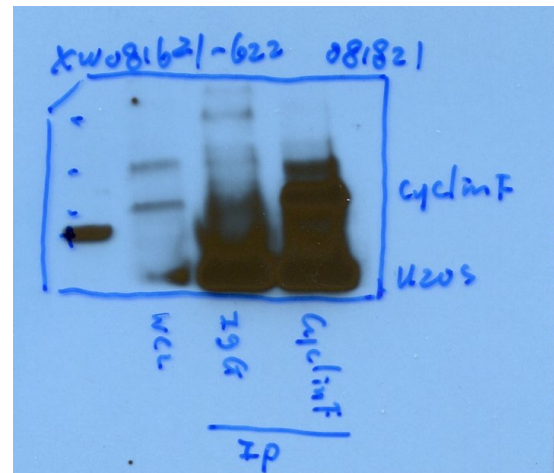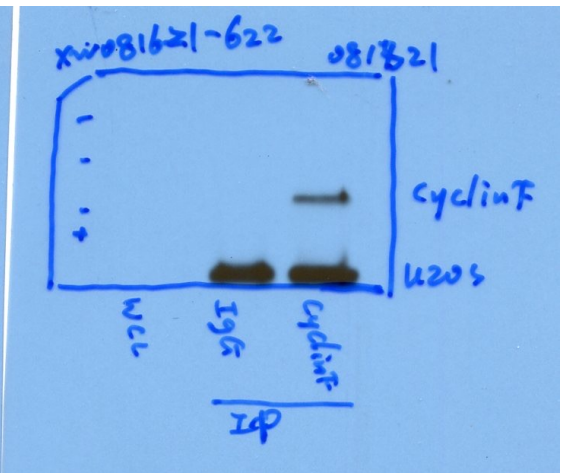

Supplement: supp2 [file elife-70691-supp2-v2.zip]

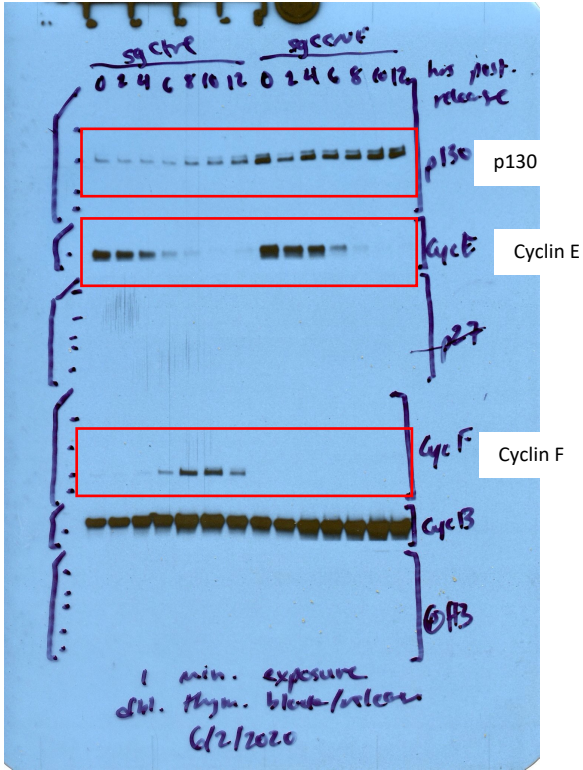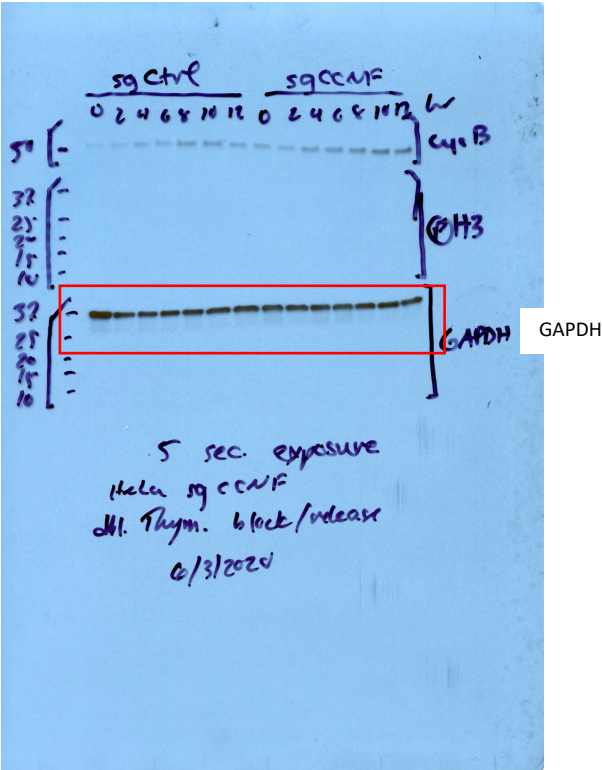

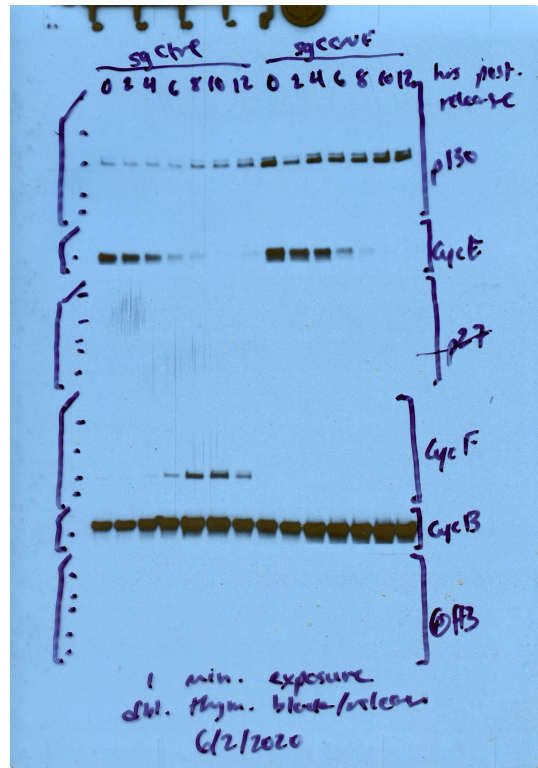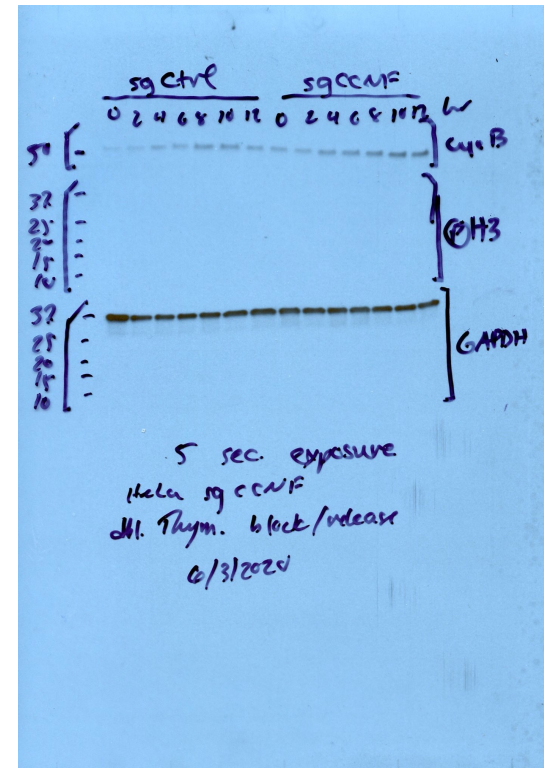

Supplement: supp2 [file elife-70691-supp2-v2.zip]

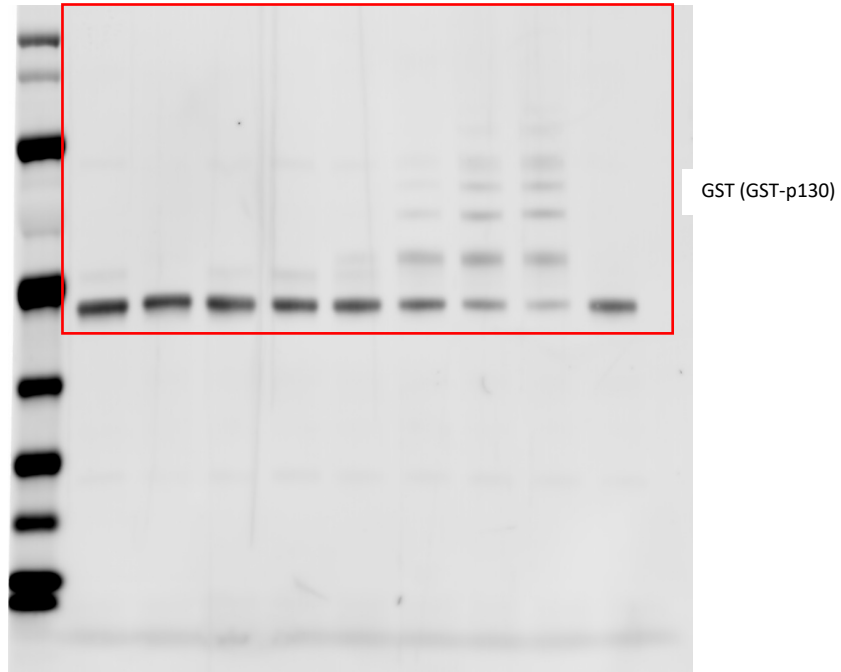

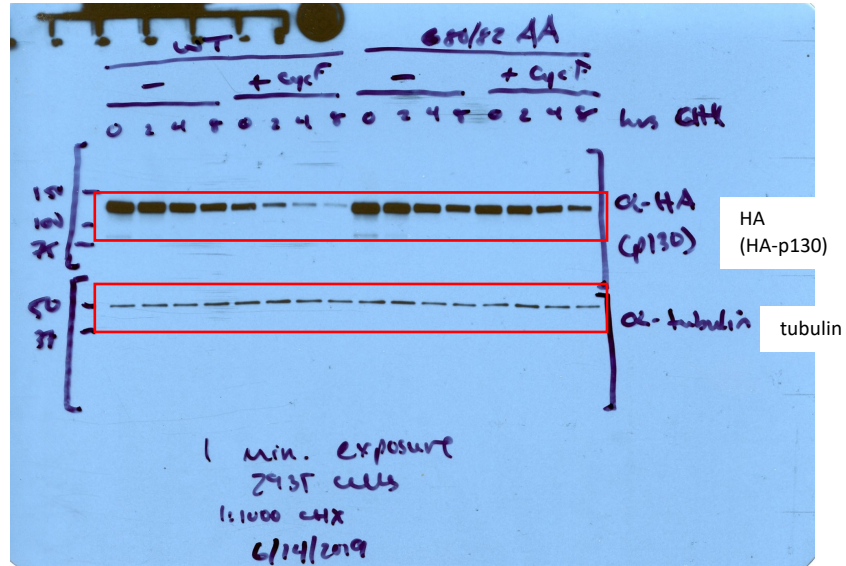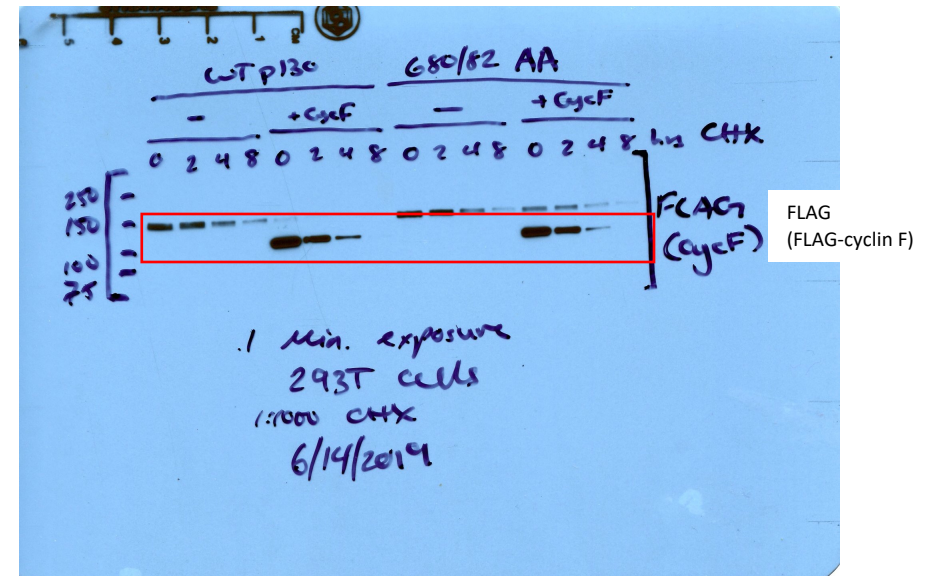

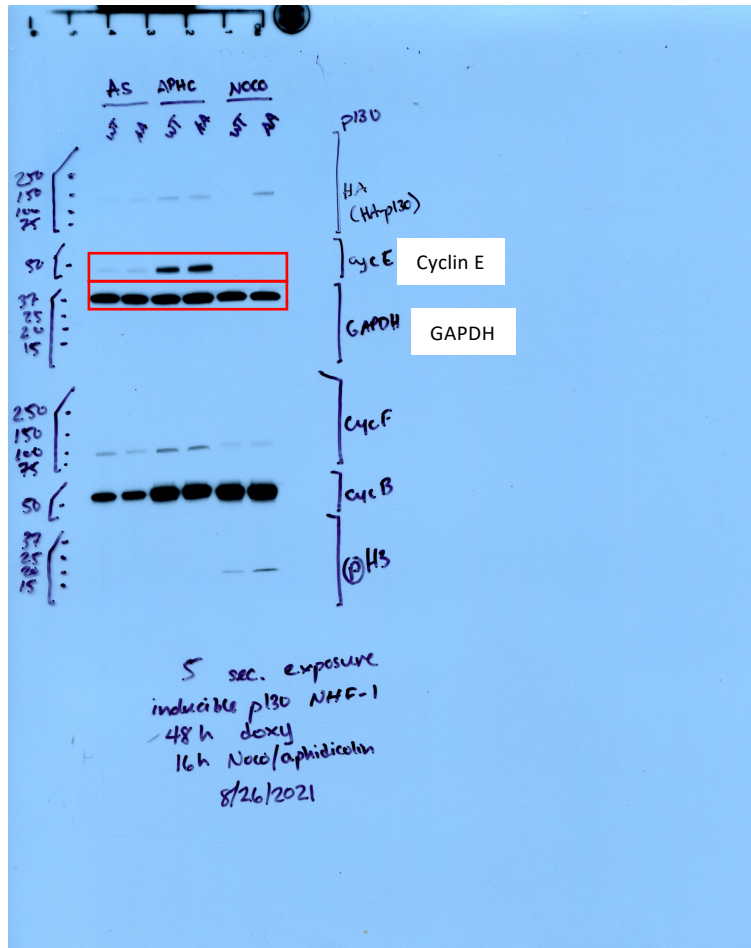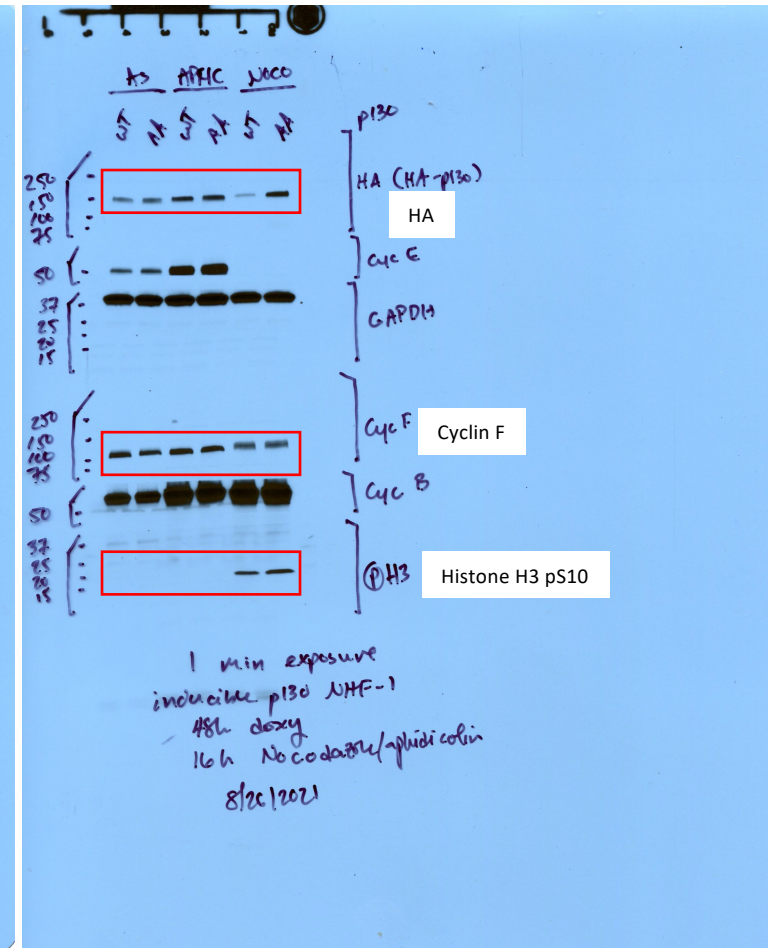

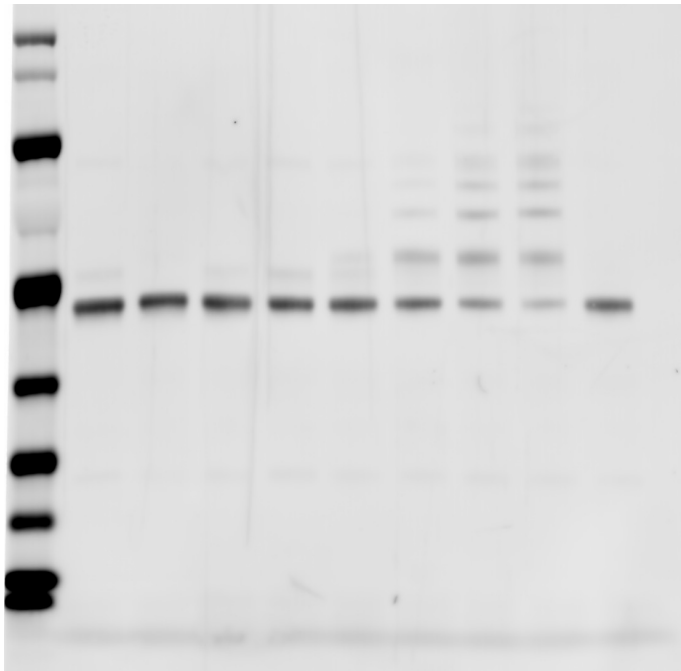

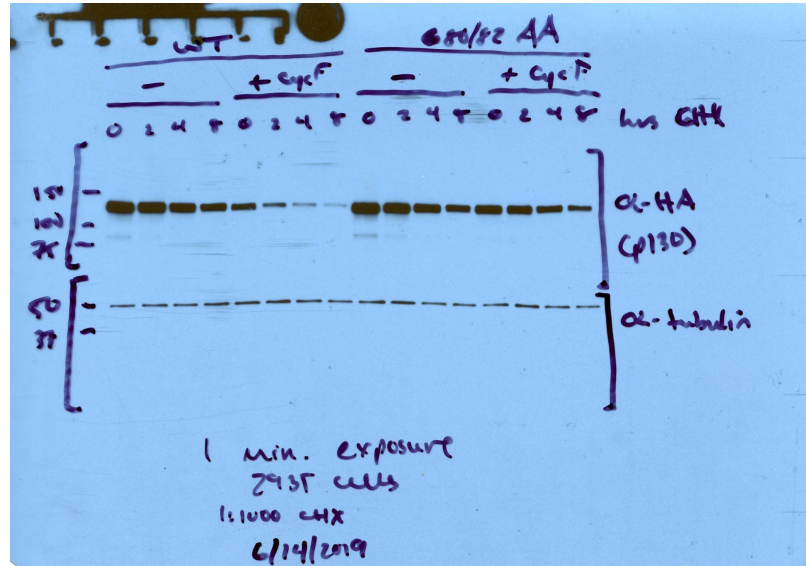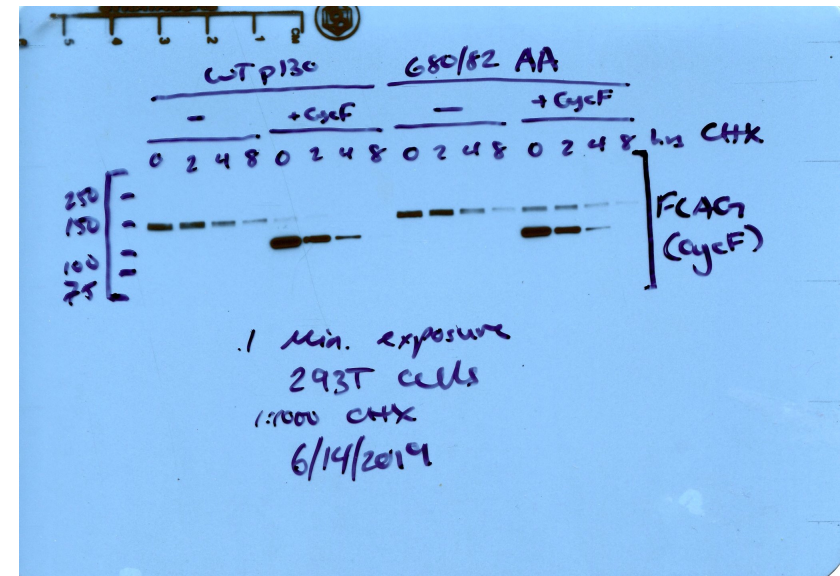



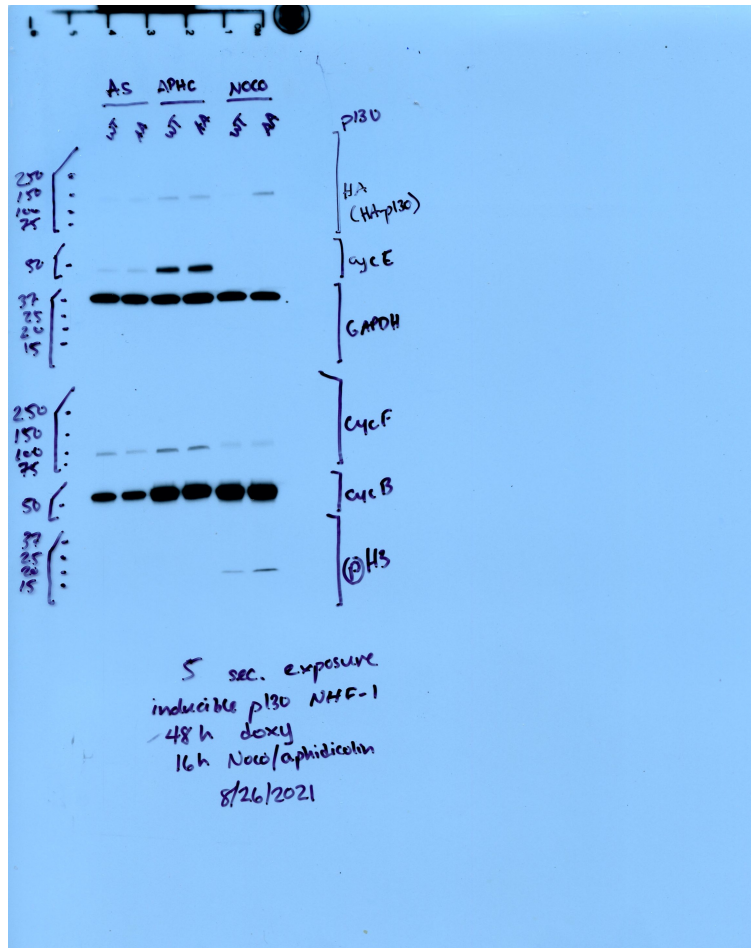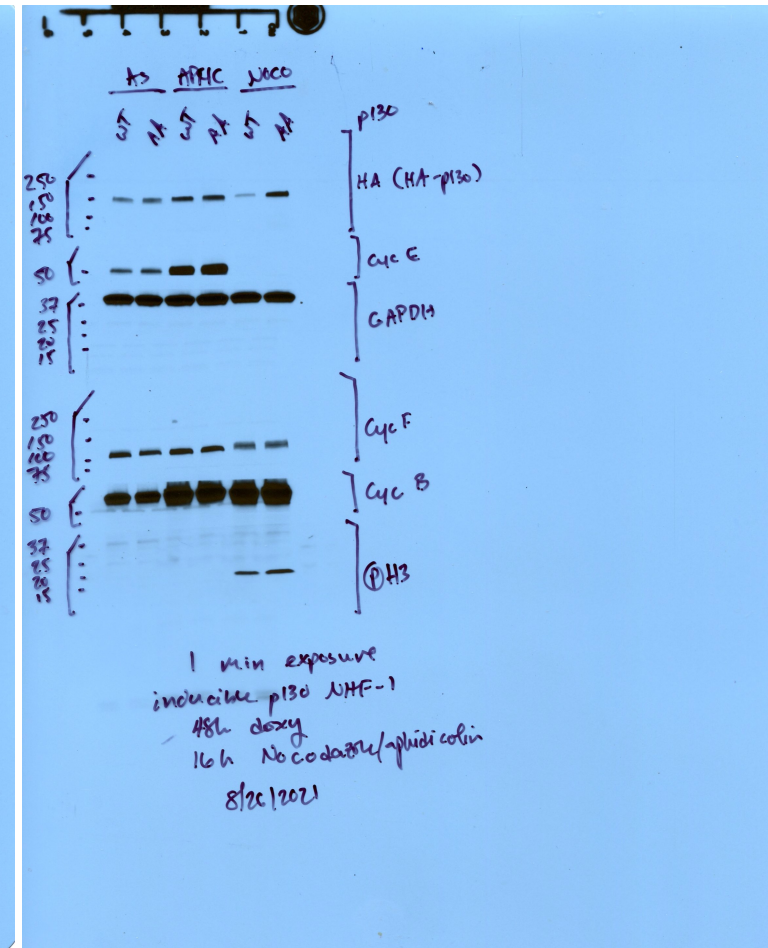

Supplement: supp2 [file elife-70691-supp2-v2.zip]
